# Supplementary material for: OsSHMT4 Is Required for Synthesis of Rice Storage Protein and Storage Organelle Formation in Endosperm Cells
Source: MDPI journal article supplement (doi:10.3390/plants13010081), 2023-12-26
Supplement: s1 [file s1]

Supplemental Figures for

**OsSHMT4 Is Required for Synthesis of Rice Storage Protein and Storage Organelle Formation in Endosperm Cells**

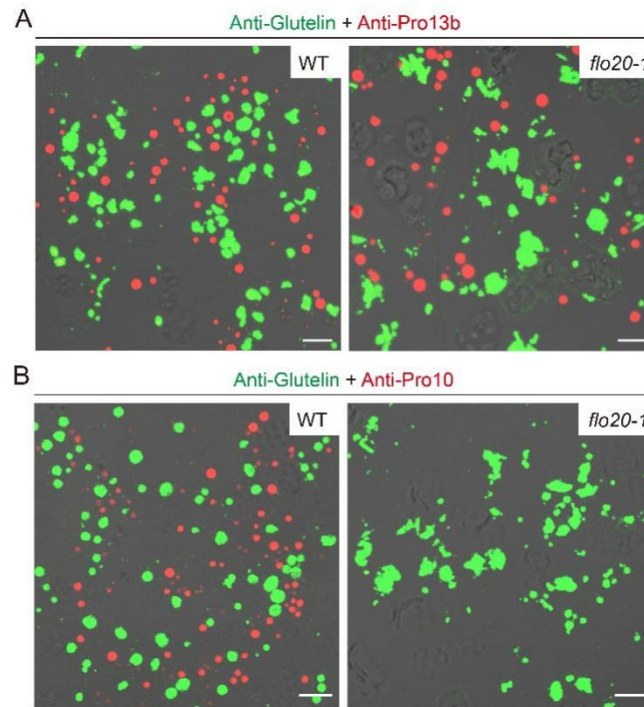

**Supplemental Figure 1.** Double immunofluorescence microscopy of glutelin and prolamins in the developing subaleurone cells of the WT and *flo20-1* endosperm at 9 DAF. Secondary antibodies labeled with Alexa Fluor 488 (green) and Alexa Fluor 555 (red) were used to detect antigens recognized by the monoclonal anti-glutelin antibodies from mice and polyclonal anti- Pro 13b (A) or anti- Pro 10 (B) antibodies from rabbits, respectively. Bars = 5  $\mu$ m.
