# Supplementary material for: OsSHMT4 Is Required for Synthesis of Rice Storage Protein and Storage Organelle Formation in Endosperm Cells
Source: Plants (Basel). 2023 Dec 26;13(1):81. doi: 10.3390/plants13010081 (PMC10780996; doi:10.3390/plants13010081)
Supplement: Supplementary file 1 [file plants-13-00081-s001.zip › Table S1.xlsx]

## Sheet: Table S1
Table S1. Summary of the RNA-seq outcomes of 6 samples
Samples	Independent replicate	Raw reads	Clean reads	Q20 (%)	Q30 (%)	GC content (%)	Clean bases	Total mapped (%)
WT	#1	43927184	43147922	97.23	92.49	52.42	6.47G	96.12
	#2	44333568	44162996	98	94.16	50.25	6.62G	0.9535
	#3	44739190	44532892	98.08	94.39	50.11	6.68G	0.9599
flo20-1	#1	45352756	45207078	98.25	94.9	49.78	6.78G	0.9186
	#2	47221144	45983668	97.73	93.73	50.51	6.9G	0.944
	#3	47851014	46581666	97.91	94.06	49.66	6.99G	0.9381
