# Supplementary material for: OsSHMT4 Is Required for Synthesis of Rice Storage Protein and Storage Organelle Formation in Endosperm Cells
Source: Plants (Basel). 2023 Dec 26;13(1):81. doi: 10.3390/plants13010081 (PMC10780996; doi:10.3390/plants13010081)
Supplement: Supplementary file 1 [file plants-13-00081-s001.zip › Table S2.xlsx]

## Sheet: Sheet1
Table S2. Identification of differentially expressed genes
Gene_id	Gene_start	Gene_end	flo20-1			Mean (flo20-1)	WT			Mean (WT)	log2FoldChange	Pvalue	Padj
			#1	#2	#3		#1	#2	#3
LOC_Os01g01660	327128	328451	1029.44	1308.92	1013.88	1117.41	387.213	150.389	217.007	251.536	2.1538	1.0221e-09	1.19025e-07
LOC_Os01g01970	524579	528002	115.157	77.7576	77.5595	90.1581	182.218	165.428	229.657	192.435	-1.09434	0.000722536	0.0162894
LOC_Os01g02120	612564	615650	11.3413	22.4633	24.2957	19.3668	49.3507	131.054	213.114	131.173	-2.76487	2.91998e-07	2.01701e-05
LOC_Os01g02160	632093	632913	363.793	364.597	141.102	289.831	46.8199	32.2263	55.4681	44.8381	2.69164	2.11373e-10	2.83823e-08
LOC_Os01g02910	1066448	1069826	46.2374	44.0627	44.8537	45.0512	7.59241	8.59368	5.83875	7.34161	2.6239	2.34881e-06	0.000126932
LOC_Os01g03340	1347567	1348786	0.872404	0	0	0.290801	7.59241	162.206	150.834	106.877	-8.38991	5.9162e-06	0.000291033
LOC_Os01g03360	1353629	1354802	0	0	0.934451	0.311484	53.1469	1825.08	1434.39	1104.2	-11.7583	1.45953e-09	1.64858e-07
LOC_Os01g03390	1365508	1366503	42.7478	18.1434	5.60671	22.166	70.8625	107.421	55.4681	77.9172	-1.80975	0.00255027	0.0430627
LOC_Os01g03914	1673010	1680632	365.537	363.733	252.302	327.191	928.805	718.646	628.638	758.697	-1.21235	2.05253e-05	0.000829775
LOC_Os01g04370	1948737	1949587	953.538	1578.48	1385.79	1305.94	4649.09	2994.9	2332.58	3325.52	-1.3483	3.42591e-05	0.00127891
LOC_Os01g04380	1951928	1952771	22.6825	76.0297	15.8857	38.1993	99.9668	232.029	121.641	151.212	-1.98319	0.000348619	0.00898625
LOC_Os01g04920	2275067	2278872	108.178	16.4155	41.1159	55.2365	84.782	261.033	222.845	189.553	-1.77987	0.00228147	0.0398169
LOC_Os01g04950	2292111	2298407	182.332	130.46	139.233	150.675	383.417	294.333	259.824	312.525	-1.05088	0.000426695	0.0105841
LOC_Os01g05064	2377322	2377980	17.4481	9.50371	6.54116	11.1643	53.1469	46.191	28.2206	42.5195	-1.92082	0.000777349	0.0171502
LOC_Os01g06140	2925935	2928765	16.5757	6.04781	4.67226	9.09858	0	0	0	0	5.49523	0.000853632	0.0184147
LOC_Os01g06220	2957066	2958443	9.59645	32.831	10.279	17.5688	1.2654	2.14842	0	1.13794	3.98886	0.00076541	0.0170279
LOC_Os01g06560	3091123	3092865	123.881	95.9011	65.4116	95.0647	45.5545	27.9294	43.7906	39.0915	1.28462	0.00184085	0.0336441
LOC_Os01g06630	3124351	3125325	11.3413	4.31987	4.67226	6.77779	12.654	125.683	109.963	82.7665	-3.61103	9.60508e-07	5.79785e-05
LOC_Os01g07160	3380727	3382058	5.23443	13.8236	12.1479	10.402	0	1.07421	0	0.35807	4.72468	0.00215719	0.038197
LOC_Os01g07250	3422011	3425559	94.2197	51.8384	55.1326	67.0636	222.711	195.506	223.819	214.012	-1.67326	8.09765e-07	5.11065e-05
LOC_Os01g07360	3473760	3477924	44.4926	81.2135	35.5091	53.7384	208.791	145.018	172.243	175.351	-1.70321	1.10032e-05	0.00049842
LOC_Os01g07530	3598418	3602211	45.365	63.934	18.689	42.6627	269.531	359.86	296.803	308.731	-2.85216	2.23629e-12	4.03115e-10
LOC_Os01g07560	3621211	3625356	3.48962	9.50371	1.8689	4.95408	32.9005	18.2616	24.3281	25.1634	-2.3317	0.00181023	0.0332461
LOC_Os01g07730	3711212	3713653	404.796	470.866	460.684	445.449	156.91	69.8236	119.694	115.476	1.95085	4.26187e-09	4.50457e-07
LOC_Os01g08150	3939131	3942405	39.2582	109.725	39.247	62.7433	11.3886	13.9647	21.4087	15.5874	1.99982	0.00045603	0.0111025
LOC_Os01g08260	4033751	4037473	2458.44	1794.47	1306.36	1853.09	658.009	806.731	1231.98	898.905	1.04316	0.00172931	0.0322466
LOC_Os01g08330	4081316	4082680	1.74481	5.18384	0	2.30955	44.2891	23.6326	27.2475	31.7231	-3.75418	7.28609e-06	0.0003512
LOC_Os01g08440	4152864	4154680	323.662	907.172	698.035	642.956	354.313	236.326	157.646	249.428	1.36791	0.000909491	0.0194128
LOC_Os01g08820	4431532	4433679	64.5579	84.6694	51.3948	66.874	10.1232	10.7421	5.83875	8.90135	2.92359	2.31571e-08	2.09432e-06
LOC_Os01g08860	4449032	4449876	1397.59	2264.47	1226	1629.36	3806.33	5476.32	3449.73	4244.13	-1.38109	1.26366e-05	0.000554326
LOC_Os01g09580	4909890	4914370	45.365	118.364	40.1814	67.9703	22.7772	9.66789	27.2475	19.8975	1.77227	0.00203032	0.0363743
LOC_Os01g09590	4917884	4919224	76.7716	39.7428	37.3781	51.2975	26.5734	10.7421	11.6775	16.331	1.66953	0.00273171	0.0453764
LOC_Os01g10400	5478476	5479836	207.632	128.732	99.0518	145.139	385.948	461.91	525.487	457.782	-1.65708	6.97275e-07	4.46494e-05
LOC_Os01g10440	5507002	5509548	55.8339	71.7098	43.9192	57.1543	151.848	126.757	104.124	127.576	-1.15459	0.00113501	0.0229873
LOC_Os01g10480	5543648	5544544	213.739	85.5334	85.9695	128.414	21.5118	19.3358	25.3012	22.0496	2.54009	1.01092e-07	7.6894e-06
LOC_Os01g11480	6183125	6183625	20.0653	4.31987	2.80335	9.06284	102.498	48.3394	47.6831	66.1734	-2.8593	2.01645e-05	0.000819844
LOC_Os01g12020	6541005	6543076	108.178	47.5185	68.2149	74.6372	11.3886	5.37105	9.73124	8.8303	3.08771	1.99832e-08	1.84533e-06
LOC_Os01g12030	6541971	6544461	156.16	491.601	244.826	297.529	8.85782	3.22263	3.8925	5.32431	5.84356	3.16996e-23	1.89607e-20
LOC_Os01g12190	6649789	6650522	136.095	44.0627	49.5259	76.5612	329.005	230.955	181.001	246.987	-1.68776	0.000189297	0.00537424
LOC_Os01g12250	6694004	6696795	64.5579	59.6142	41.1159	55.096	12.654	13.9647	11.6775	12.7654	2.11209	1.74674e-05	0.000725091
LOC_Os01g12860	7115771	7124102	70.6647	187.482	63.5427	107.23	30.3697	21.4842	47.6831	33.179	1.68883	0.00104622	0.021528
LOC_Os01g13360	7443685	7447196	1819.84	3000.58	3169.66	2663.36	5911.96	6241.16	5654.83	5935.98	-1.15627	2.79075e-05	0.00107222
LOC_Os01g14090	7891541	7894725	62.8131	128.732	45.7881	79.1111	13.9194	11.8163	25.3012	17.0123	2.20828	4.1501e-05	0.00149415
LOC_Os01g14410	8061858	8062908	1.74481	2.59192	4.67226	3.003	8.85782	36.5231	28.2206	24.5338	-3.04613	0.000294172	0.00775753
LOC_Os01g15000	8404247	8408377	208.505	329.174	213.055	250.244	675.725	577.925	463.207	572.286	-1.19235	7.26308e-05	0.00244125
LOC_Os01g15240	8532212	8532919	7.85164	11.2317	8.41006	9.16445	0	0	0	0	5.50463	0.000534163	0.012665
LOC_Os01g15480	8691739	8699628	102.071	241.913	112.134	152.039	44.2891	24.7068	33.0862	34.0274	2.16553	1.26056e-06	7.3397e-05
LOC_Os01g16040	9024897	9028876	2935.64	2248.06	2229.6	2471.1	5582.96	5569.78	6542.31	5898.35	-1.25518	1.36e-07	1.0054e-05
LOC_Os01g16140	9114002	9114253	34.8962	32.831	28.968	32.2317	384.682	185.838	107.044	225.855	-2.80544	1.17301e-09	1.35401e-07
LOC_Os01g16310	9245577	9253454	73.282	93.3091	66.346	77.6457	2.5308	1.07421	4.86562	2.82355	4.74972	1.37262e-12	2.56202e-10
LOC_Os01g16650	9445679	9446566	40.1306	144.284	51.3948	78.603	17.7156	6.44526	11.6775	11.9461	2.73084	7.75628e-06	0.000369132
LOC_Os01g17420	10018752	10020376	0	3.45589	0	1.15196	32.9005	7.51947	8.75812	16.3927	-3.79918	0.00202134	0.0362629
LOC_Os01g18110	10144292	10146312	2.61721	12.0956	5.60671	6.77318	89.8436	137.499	118.721	115.355	-4.08672	5.39662e-15	1.49503e-12
LOC_Os01g19140	10813997	10818530	68.0475	57.8862	49.5259	58.4866	6.32701	24.7068	20.4356	17.1565	1.75266	0.000763211	0.0169934
LOC_Os01g19240	10877635	10881693	125.626	89.8533	78.4939	97.9911	0	0	0	0	8.92316	1.04596e-12	1.96625e-10
LOC_Os01g20110	11412131	11421047	258.232	215.129	168.201	213.854	82.2512	98.8273	125.533	102.204	1.062	0.00101819	0.0210998
LOC_Os01g20840	11618335	11622535	757.247	824.231	830.727	804.068	1798.14	1807.89	1547.27	1717.77	-1.09503	9.0141e-07	5.52991e-05
LOC_Os01g20940	11693809	11700025	69.7923	112.317	55.1326	79.0805	172.095	166.502	152.781	163.793	-1.04846	0.00298931	0.0484736
LOC_Os01g21034	11741377	11750709	0	0	0	0	6.32701	26.8552	36.0056	23.0626	-7.14617	8.43518e-07	5.24816e-05
LOC_Os01g21590	12091633	12093276	265.211	200.442	275.663	247.105	1121.15	469.43	272.475	621.017	-1.32847	0.00275092	0.0454766
LOC_Os01g21900	12291788	12294943	4.36202	7.77576	3.73781	5.29186	5.06161	38.6715	76.8768	40.2033	-2.92911	0.000438657	0.0107792
LOC_Os01g22230	12499923	12504215	37.5134	22.4633	14.9512	24.976	117.682	85.9368	129.426	111.015	-2.14924	6.80623e-07	4.37962e-05
LOC_Os01g22540	12664720	12665440	0	2.59192	0.934451	1.17546	17.7156	19.3358	21.4087	19.4867	-4.04441	7.97399e-05	0.00264307
LOC_Os01g23580	13237248	13246183	8.72404	12.0956	20.5579	13.7925	0	0	0	0	6.09225	4.46234e-05	0.00159271
LOC_Os01g23990	13508317	13508882	11.3413	4.31987	2.80335	6.15483	40.4929	22.5584	34.0594	32.3702	-2.38643	0.00043639	0.0107537
LOC_Os01g24820	13979885	13983744	2.61721	7.77576	2.80335	4.39878	36.6967	47.2652	46.71	43.5573	-3.30155	2.33829e-07	1.63668e-05
LOC_Os01g25484	14446910	14453474	291.383	275.608	232.678	266.556	132.867	113.866	147.915	131.549	1.01843	0.000285685	0.00758106
LOC_Os01g26320	14924923	14928015	205.015	556.399	591.508	450.974	68.3317	16.1131	30.1669	38.2039	3.57202	1.83681e-12	3.35702e-10
LOC_Os01g27360	15281130	15283073	6.97923	2.59192	0.934451	3.50187	73.3933	46.191	49.6293	56.4046	-3.9935	2.00655e-09	2.21884e-07
LOC_Os01g28030	15672566	15676615	44.4926	63.934	36.4436	48.2901	13.9194	9.66789	24.3281	15.9718	1.58695	0.00287678	0.0469671
LOC_Os01g28134	15760468	15763180	96.8369	106.269	136.43	113.179	15.1848	5.37105	10.7044	10.4201	3.45831	2.60585e-13	5.44292e-11
LOC_Os01g28230	15814357	15815151	1.74481	12.0956	9.34451	7.72832	0	0	0	0	5.2579	0.00256937	0.043291
LOC_Os01g28300	15850967	15854629	106.433	310.167	320.517	245.706	140.46	76.2689	61.3068	92.6785	1.41078	0.00222256	0.0390216
LOC_Os01g28474	15948776	15953098	401.306	819.911	453.209	558.142	212.588	138.573	85.6349	145.599	1.94244	9.82126e-07	5.88783e-05
LOC_Os01g28810	16135872	16141134	661.282	802.631	672.805	712.24	199.934	178.319	190.732	189.662	1.90953	1.12132e-14	2.86515e-12
LOC_Os01g28960	16219615	16220763	42.7478	30.2391	28.0335	33.6735	192.341	146.092	131.372	156.602	-2.21394	8.95877e-10	1.07171e-07
LOC_Os01g28970	16224929	16226730	6.97923	26.7832	30.8369	21.5331	108.825	90.2336	58.3875	85.8152	-1.99472	0.000159662	0.00470222
LOC_Os01g32380	17767880	17768465	246.89	235.865	206.514	229.756	999.668	645.6	473.912	706.393	-1.61915	5.07278e-07	3.346e-05
LOC_Os01g32770	17975816	17977327	435.33	510.608	302.762	416.233	2714.29	1669.32	1116.17	1833.26	-2.13834	2.25969e-09	2.46766e-07
LOC_Os01g33040	18150894	18157844	56.7063	199.578	72.8872	109.724	3.79621	25.781	40.8712	23.4828	2.21026	0.000745405	0.0166674
LOC_Os01g33080	18186985	18193374	41.003	202.17	40.1814	94.4514	11.3886	10.7421	14.5969	12.2425	2.94481	6.63898e-06	0.000323564
LOC_Os01g33324	18359028	18363280	0	0.863974	0	0.287991	13.9194	17.1874	12.6506	14.5858	-5.51562	0.000130819	0.00397563
LOC_Os01g33370	18374765	18376668	13.0861	49.2465	20.5579	27.6302	1.2654	1.07421	0.973124	1.10425	4.65881	2.01861e-05	0.000819844
LOC_Os01g34610	19079248	19083485	113.413	125.276	89.7073	109.465	31.6351	36.5231	62.28	43.4794	1.32386	0.000770695	0.0170875
LOC_Os01g34880	19258341	19260839	311.448	133.052	176.611	207.037	384.682	695.014	731.789	603.828	-1.54481	4.94926e-05	0.00174604
LOC_Os01g34890	19264464	19280458	21.8101	169.339	147.643	112.931	255.611	490.914	461.261	402.595	-1.83466	0.000787359	0.01734
LOC_Os01g35240	19509980	19511790	3.48962	28.5111	14.9512	15.6507	0	0	0	0	6.2767	5.12975e-05	0.00179289
LOC_Os01g36390	20192025	20197004	166.629	363.733	270.991	267.118	106.294	110.644	119.694	112.211	1.25052	0.00031815	0.00833142
LOC_Os01g36720	20386195	20388517	6.97923	3.45589	0.934451	3.78986	48.0853	42.9684	33.0862	41.38	-3.43329	5.12175e-07	3.36145e-05
LOC_Os01g37910	21230393	21234929	461.502	587.502	369.108	472.704	215.118	197.655	208.249	207.007	1.19182	2.12656e-05	0.000854453
LOC_Os01g38480	21623575	21626767	617.662	589.23	737.282	648.058	2027.17	1144.03	833.968	1335.06	-1.0422	0.00230022	0.0400908
LOC_Os01g39136	22031208	22034011	29.6617	3.45589	2.80335	11.9737	110.09	256.736	110.936	159.254	-3.7292	4.4007e-08	3.70024e-06
LOC_Os01g40870	23113645	23119715	19.1929	20.7354	11.2134	17.0472	3.79621	2.14842	0.973124	2.30592	2.9338	0.00164322	0.0310009
LOC_Os01g41050	23247278	23250623	20.0653	29.3751	14.9512	21.4639	323.943	176.17	139.157	213.09	-3.30582	4.00435e-14	9.32625e-12
LOC_Os01g41140	23291659	23292667	94.2197	73.4378	46.7226	71.46	822.512	445.797	304.588	524.299	-2.87284	2.63747e-12	4.69006e-10
LOC_Os01g42234	23923718	23933451	71.5371	53.5664	41.1159	55.4065	125.275	147.167	116.775	129.739	-1.22586	0.000492323	0.0118357
LOC_Os01g42520	24181111	24184171	608.938	394.836	531.703	511.826	1753.85	1127.92	881.651	1254.47	-1.29287	6.2093e-05	0.00212505
LOC_Os01g42900	24408469	24410460	2.61721	0	4.67226	2.42982	25.308	15.0389	22.3819	20.9096	-3.12123	0.000498568	0.0119502
LOC_Os01g43370	24808514	24813403	505.122	304.983	313.976	374.693	99.9668	128.905	86.6081	105.16	1.83377	2.33976e-08	2.10883e-06
LOC_Os01g43710	25045176	25049414	505.994	764.617	690.559	653.724	213.853	352.341	328.916	298.37	1.13001	0.000185654	0.00529939
LOC_Os01g43890	25144495	25146560	310.576	333.494	187.825	277.298	62.0047	21.4842	30.1669	37.8853	2.88469	9.70575e-12	1.55754e-09
LOC_Os01g44050	25234661	25238165	258.232	320.534	345.747	308.171	156.91	70.8978	86.6081	104.805	1.56134	1.0639e-05	0.000484426
LOC_Os01g44340	25442405	25444195	0.872404	8.63974	5.60671	5.03962	106.294	47.2652	73.9574	75.8388	-3.90929	5.35231e-10	6.70772e-08
LOC_Os01g45110	25598446	25600373	38.3858	135.644	71.9527	81.9941	29.1043	10.7421	15.57	18.4721	2.16327	0.000133489	0.00404277
LOC_Os01g45460	25792699	25797614	25.2997	109.725	90.6418	75.222	122.744	295.408	268.582	228.911	-1.60712	0.0013314	0.0261687
LOC_Os01g45659	25931149	25931730	22.6825	50.9744	25.2302	32.9624	116.417	79.4915	65.1993	87.036	-1.3955	0.00213655	0.0379161
LOC_Os01g46220	26290150	26292389	1425.51	2403.57	1319.45	1716.18	25.308	1.07421	14.5969	13.6597	6.98104	1.87457e-13	4.01097e-11
LOC_Os01g46760	26652944	26658313	98.5817	144.284	134.561	125.809	297.37	261.033	232.577	263.66	-1.06654	0.000286385	0.0075902
LOC_Os01g47270	27014072	27014866	41.003	48.3825	38.3125	42.566	159.441	95.6046	89.5274	114.858	-1.42728	0.000189748	0.00537896
LOC_Os01g47300	27033000	27035765	13.9585	5.18384	10.279	9.80709	31.6351	70.8978	37.9518	46.8282	-2.25868	0.000122383	0.00374521
LOC_Os01g49130	28240069	28240557	8.72404	8.63974	14.9512	10.7717	92.3744	38.6715	25.3012	52.1157	-2.27057	0.000209995	0.0058483
LOC_Os01g49200	28282813	28287096	79.3888	217.721	74.7561	123.955	37.9621	22.5584	56.4412	38.9872	1.66628	0.00116984	0.0235021
LOC_Os01g50370	28921498	28923085	10.4689	15.5515	12.1479	12.7227	149.317	230.955	157.646	179.306	-3.81637	7.69608e-21	3.82161e-18
LOC_Os01g50410	28938971	28940927	13.0861	15.5515	4.67226	11.1033	77.1895	54.7847	47.6831	59.8858	-2.42072	6.27159e-06	0.00030794
LOC_Os01g50420	28945228	28948045	27.9169	10.3677	7.47561	15.2534	75.9241	60.1557	44.7637	60.2812	-1.97591	0.000388003	0.00976096
LOC_Os01g50440	28955683	28957041	1.74481	2.59192	0	1.44558	60.7393	38.6715	24.3281	41.2463	-4.80296	4.80206e-08	3.98677e-06
LOC_Os01g50700	29119761	29124636	420.499	319.67	309.303	349.824	1228.71	1559.75	1605.66	1464.7	-2.06601	1.60975e-15	4.65553e-13
LOC_Os01g51540	29605119	29606563	136.967	134.78	142.971	138.239	504.896	304.001	264.69	357.862	-1.37042	2.2195e-05	0.000882369
LOC_Os01g51570	29620954	29622393	21.8101	6.91179	5.60671	11.4429	0	0	0	0	5.82591	0.000246453	0.00668124
LOC_Os01g52140	29995196	29999996	405.668	319.67	268.188	331.175	487.18	896.965	870.946	751.697	-1.18306	0.000213819	0.00592346
LOC_Os01g52230	30025249	30026465	923.004	153.787	399.011	491.934	2037.3	1372.84	1051.95	1487.36	-1.59601	0.00136595	0.0266093
LOC_Os01g52514	30173442	30179151	0	0	1.8689	0.622968	3.79621	32.2263	23.355	19.7925	-5.04745	0.000228626	0.00626117
LOC_Os01g52690	30293943	30296578	4.36202	2.59192	0.934451	2.62946	8.85782	373.825	302.642	228.441	-6.43666	3.74794e-06	0.00019417
LOC_Os01g52730	30322749	30325085	12.2137	25.9192	24.2957	20.8095	65.8009	82.7141	62.28	70.265	-1.75677	9.29497e-05	0.00300522
LOC_Os01g52740	30340015	30341594	1.74481	2.59192	2.80335	2.38003	20.2464	24.7068	17.5162	20.8232	-3.13149	0.000138401	0.00418162
LOC_Os01g52830	30386374	30387917	102.071	298.935	155.119	185.375	618.782	435.055	383.411	479.083	-1.36881	0.000579212	0.0134424
LOC_Os01g52900	30413604	30415814	14.8309	83.8054	70.0838	56.2401	716.218	327.634	239.389	427.747	-2.92657	6.3424e-08	5.089e-06
LOC_Os01g53430	30694909	30696710	69.7923	105.405	114.003	96.4001	20.2464	13.9647	7.78499	13.9987	2.80608	3.89255e-09	4.16439e-07
LOC_Os01g53840	30949378	30954738	98.5817	77.7576	105.593	93.9774	182.218	266.404	189.759	212.794	-1.18023	0.000175463	0.00508014
LOC_Os01g53880	30975765	30979770	51.4718	37.1509	29.9024	39.5084	67.0663	98.8273	114.829	93.5741	-1.24604	0.00193884	0.0350959
LOC_Os01g53990	31055593	31058475	6.10683	5.18384	2.80335	4.69801	5.06161	29.0037	58.3875	30.8176	-2.71801	0.0013084	0.0258712
LOC_Os01g54270	31220321	31228566	16.5757	1.72795	2.80335	7.03566	29.1043	49.4136	43.7906	40.7695	-2.53216	0.000616564	0.0141102
LOC_Os01g54520	31359199	31362009	45.365	94.1731	52.3293	63.9558	86.0474	199.803	232.577	172.809	-1.43586	0.00123939	0.0247108
LOC_Os01g54670	31453332	31457551	61.0683	64.798	33.6402	53.1689	131.602	95.6046	131.372	119.526	-1.16625	0.00209743	0.0373731
LOC_Os01g54810	31524048	31527177	236.422	278.199	261.646	258.756	888.312	569.331	488.508	648.717	-1.3249	1.10545e-05	0.000499882
LOC_Os01g55000	31629246	31630738	11.3413	1.72795	1.8689	4.97937	27.8389	34.3747	27.2475	29.8203	-2.57599	0.000710918	0.01606
LOC_Os01g55220	31766630	31766842	37.5134	187.482	54.1982	93.0646	22.7772	18.2616	35.0325	25.3571	1.87256	0.00174335	0.0323794
LOC_Os01g55240	31795105	31797643	39.2582	25.9192	4.67226	23.2832	131.602	117.089	138.184	128.958	-2.46498	4.66144e-06	0.000236834
LOC_Os01g55310	31836495	31839636	246.018	247.96	328.927	274.302	746.587	1486.71	1280.63	1171.31	-2.09505	3.79091e-11	5.605e-09
LOC_Os01g55510	31981931	31982832	2.61721	2.59192	0.934451	2.04786	20.2464	23.6326	20.4356	21.4382	-3.37677	6.86937e-05	0.00232376
LOC_Os01g55600	32032686	32035011	79.3888	107.133	118.675	101.732	512.488	182.616	185.867	293.657	-1.52745	0.000385856	0.00975467
LOC_Os01g55690	32076732	32078743	598266	426885	533076	519409	1.51546e+06	1.4287e+06	1.20567e+06	1.38328e+06	-1.41315	6.00316e-09	6.14752e-07
LOC_Os01g55780	32130586	32137004	310.576	265.24	262.581	279.466	435.298	908.781	867.054	737.044	-1.39984	1.71203e-05	0.000711805
LOC_Os01g56940	32893379	32899784	26.1721	66.526	48.5915	47.0965	6.32701	0	9.73124	5.35275	3.1274	2.52957e-05	0.000986269
LOC_Os01g57050	32947994	32949231	35.7686	25.0552	17.7546	26.1928	125.275	88.0852	77.8499	97.07	-1.88415	8.69549e-06	0.000403612
LOC_Os01g57240	33073501	33078968	166.629	244.505	161.66	190.931	113.886	60.1557	73.9574	82.6665	1.21294	0.000731854	0.0164623
LOC_Os01g57450	33200667	33201485	291.383	530.48	404.617	408.827	1274.26	899.113	750.279	974.551	-1.25265	9.35016e-05	0.00301936
LOC_Os01g57890	33471900	33478535	2460.18	6840.08	3850.87	4383.71	234.099	102.05	92.4468	142.865	4.94328	2.49776e-30	2.85809e-27
LOC_Os01g58130	33618365	33619178	81.1336	35.4229	27.0991	47.8852	137.929	126.757	112.882	125.856	-1.39158	0.00152026	0.0290015
LOC_Os01g58590	33876599	33877057	587.128	943.459	554.13	694.906	0	0	0.973124	0.324375	10.7872	1.16748e-18	4.95576e-16
LOC_Os01g58600	33882081	33882290	776.44	1224.25	1039.11	1013.27	74.6587	18.2616	36.9787	43.2997	4.5607	1.35519e-27	1.22986e-24
LOC_Os01g58660	33911298	33911989	3145.89	9259.2	5434.77	5946.62	540.327	100.976	233.55	291.617	4.35152	1.55944e-17	5.70018e-15
LOC_Os01g59120	34149431	34152417	27.0445	192.666	66.346	95.3522	31.6351	17.1874	21.4087	23.4104	2.03178	0.0011552	0.023297
LOC_Os01g59730	34550353	34552638	270.445	191.802	171.005	211.084	46.8199	35.4489	53.5218	45.2635	2.22034	2.33763e-10	3.12293e-08
LOC_Os01g60740	35129858	35130917	0	0	0	0	45.5545	156.835	155.7	119.363	-9.51334	1.72932e-13	3.74932e-11
LOC_Os01g61020	35309604	35312765	121.264	143.42	81.2973	115.327	11.3886	0	2.91937	4.76933	4.67217	3.68546e-13	7.23835e-11
LOC_Os01g61044	35320780	35327164	4853.18	3857.64	5186.2	4632.34	483.384	62.3042	339.62	295.103	3.97338	3.92796e-15	1.11157e-12
LOC_Os01g61370	35496868	35498571	26.1721	23.3273	23.3613	24.2869	207.526	108.495	155.7	157.24	-2.69239	4.02808e-12	6.88384e-10
LOC_Os01g61800	35752490	35754195	86.368	90.7172	79.4284	85.5045	2.5308	0	0.973124	1.16798	6.28249	1.17487e-11	1.84049e-09
LOC_Os01g62190	36001241	36002103	239.911	134.78	142.971	172.554	754.18	597.261	532.299	627.913	-1.8626	4.05007e-09	4.31537e-07
LOC_Os01g62260	36029785	36030969	20.9377	42.3347	6.54116	23.2712	760.507	341.599	303.615	468.573	-4.32598	2.78414e-16	8.52011e-14
LOC_Os01g62770	36346113	36349549	3.48962	0.863974	1.8689	2.07416	27.8389	19.3358	17.5162	21.5636	-3.37295	9.67419e-05	0.00310116
LOC_Os01g62850	36398958	36401777	27.0445	31.103	22.4268	26.8581	86.0474	58.0073	78.8231	74.2926	-1.46487	0.000315382	0.00827539
LOC_Os01g62990	36485585	36489717	31.4066	83.8054	34.5747	49.9289	183.483	113.866	131.372	142.907	-1.51394	0.000600776	0.0138452
LOC_Os01g63010	36496069	36498165	68.9199	71.7098	74.7561	71.7953	318.881	179.393	175.162	224.479	-1.64214	2.03552e-06	0.000112073
LOC_Os01g63180	36616801	36621516	2.61721	0.863974	1.8689	1.78336	17.7156	13.9647	10.7044	14.1282	-2.98286	0.00215818	0.038197
LOC_Os01g63210	36639626	36640584	91.6024	153.787	131.758	125.716	497.303	248.142	221.872	322.439	-1.35695	0.000380041	0.00966824
LOC_Os01g63680	36936984	36939364	49.727	169.339	68.2149	95.7603	355.578	238.475	235.496	276.516	-1.52814	0.00054535	0.0128722
LOC_Os01g63810	37021488	37024131	61.0683	168.475	185.956	138.5	892.109	725.091	608.203	741.801	-2.42141	6.07376e-10	7.50466e-08
LOC_Os01g64170	37269723	37274713	110.795	186.618	106.527	134.647	62.0047	55.8589	70.0649	62.6429	1.10353	0.00250901	0.0426289
LOC_Os01g64360	37358204	37359596	296.617	254.008	214.924	255.183	568.166	545.698	507.971	540.612	-1.08237	2.28606e-05	0.000900825
LOC_Os01g64480	37415815	37416480	173.608	245.368	201.841	206.939	29.1043	5.37105	10.7044	15.0599	3.81306	3.26447e-15	9.33851e-13
LOC_Os01g64640	37513746	37514564	527.805	595.278	329.861	484.315	287.246	91.3078	130.399	169.651	1.51694	0.000312427	0.00820605
LOC_Os01g64790	37589452	37592446	267.828	196.122	193.431	219.127	113.886	79.4915	83.6887	92.3555	1.25037	7.81799e-05	0.00259463
LOC_Os01g64820	37625795	37636034	713.627	1181.92	962.485	952.676	220.18	342.673	384.384	315.746	1.59155	3.92799e-07	2.62377e-05
LOC_Os01g64910	37682288	37684066	19.1929	22.4633	26.1646	22.6069	2.5308	5.37105	4.86562	4.25582	2.38883	0.00114276	0.0230992
LOC_Os01g65240	37860082	37862131	143.947	92.4452	219.596	151.996	0	2.14842	0.973124	1.04051	7.12779	3.44588e-14	8.09721e-12
LOC_Os01g65490	38012798	38014299	0	3.45589	0	1.15196	35.4313	24.7068	37.9518	32.6966	-4.79669	8.14549e-07	5.11878e-05
LOC_Os01g65510	38022774	38024230	6.97923	45.7906	25.2302	26	153.114	87.011	66.1725	102.099	-1.97006	0.000631067	0.014392
LOC_Os01g65590	38072090	38074862	6.97923	13.8236	9.34451	10.0491	46.8199	31.1521	49.6293	42.5338	-2.07998	0.000142483	0.00428556
LOC_Os01g65700	38148684	38149663	25.2997	42.3347	21.4924	29.7089	0	0	0.973124	0.324375	6.24026	3.3385e-06	0.000174677
LOC_Os01g65770	38191820	38192525	21.8101	19.8714	10.279	17.3202	148.052	45.1168	32.1131	75.094	-2.10747	0.000564995	0.0132069
LOC_Os01g66150	38431286	38433670	163.14	115.772	102.79	127.234	432.768	227.732	199.49	286.664	-1.16929	0.00174506	0.0323883
LOC_Os01g66200	38454786	38460564	132.605	273.88	160.726	189.07	272.062	431.832	526.46	410.118	-1.11791	0.00238737	0.0412818
LOC_Os01g66940	38884741	38887723	334.131	228.089	228.941	263.72	773.161	581.147	511.863	622.057	-1.23703	2.71536e-05	0.00104631
LOC_Os01g67100	38953663	38960231	211.122	458.77	375.649	348.514	59.4739	48.3394	92.4468	66.7534	2.38051	7.44436e-10	9.0704e-08
LOC_Os01g67310	39066175	39068651	1965.53	1945.67	1846.48	1919.22	5505.77	4304.36	3601.53	4470.55	-1.21976	9.75848e-07	5.86355e-05
LOC_Os01g67640	39312730	39315691	56.7063	69.9819	57.936	61.5414	1.2654	1.07421	4.86562	2.40174	4.61642	1.38254e-10	1.89509e-08
LOC_Os01g67740	39365920	39374228	88.9852	414.707	223.334	242.342	11.3886	48.3394	64.2262	41.3181	2.54366	1.41464e-05	0.000613351
LOC_Os01g67830	39414801	39418617	0	1.72795	0	0.575982	5.06161	31.1521	71.0381	35.7506	-5.93105	8.46569e-06	0.000396441
LOC_Os01g67870	39437967	39442873	133.478	164.155	118.675	138.769	267	305.076	296.803	289.626	-1.06139	0.000127067	0.00386746
LOC_Os01g68570	39829708	39831455	13.9585	7.77576	15.8857	12.54	35.4313	40.82	54.495	43.5821	-1.8044	0.000603243	0.0138777
LOC_Os01g68960	40067821	40069605	41.8754	91.5812	72.8872	68.7813	186.014	133.202	132.345	150.52	-1.12811	0.00285212	0.0467386
LOC_Os01g69900	40385312	40389442	150.926	189.21	143.905	161.347	259.407	372.751	336.701	322.953	-1.00182	0.000488003	0.011772
LOC_Os01g69960	40460001	40461483	29.6617	10.3677	18.689	19.5728	65.8009	64.4526	49.6293	59.9609	-1.61352	0.0010134	0.0210586
LOC_Os01g70500	40833544	40834861	0	0	0	0	17.7156	18.2616	15.57	17.1824	-6.71321	2.38022e-06	0.000128136
LOC_Os01g70680	40921899	40922318	5262.34	4852.94	3597.64	4570.97	60.7393	13.9647	33.0862	35.9301	7.00509	3.40378e-67	2.98603e-63
LOC_Os01g70690	40923718	40924053	61.9407	41.4707	33.6402	45.6839	12.654	2.14842	0	4.93415	3.28348	4.10066e-05	0.0014804
LOC_Os01g71420	41384286	41386417	1114.06	634.157	655.985	801.401	2233.44	2589.92	2375.4	2399.58	-1.58214	4.8913e-08	4.04809e-06
LOC_Os01g71474	41397748	41401593	173.608	199.578	207.448	193.545	1247.69	881.926	635.45	921.688	-2.25099	2.8849e-13	5.93162e-11
LOC_Os01g72170	41853850	41854883	15.7033	14.6876	8.41006	12.9336	1.2654	1.07421	0	0.779871	4.12773	0.00181435	0.0332986
LOC_Os01g72470	42020859	42021464	77.644	63.0701	63.5427	68.0856	6.32701	1.07421	2.91937	3.4402	4.35854	2.72022e-11	4.0909e-09
LOC_Os01g72490	42037167	42039622	80.2612	57.8862	47.657	61.9348	120.213	150.389	208.249	159.617	-1.36726	0.00018529	0.00529939
LOC_Os01g73580	42626321	42630440	3.48962	2.59192	0	2.02718	24.0426	17.1874	8.75812	16.6627	-3.01485	0.00221405	0.0389242
LOC_Os01g74450	43115742	43117231	238.166	171.931	142.037	184.045	59.4739	67.6752	56.4412	61.1968	1.58924	2.7461e-06	0.000147193
LOC_Os02g01100	50256	55886	200.653	275.608	205.579	227.28	27.8389	50.4878	76.8768	51.7345	2.12484	5.50429e-08	4.48489e-06
LOC_Os02g01190	110763	112365	448.416	333.494	188.759	323.556	94.9052	67.6752	114.829	92.4697	1.80641	2.13402e-06	0.00011628
LOC_Os02g01830	458596	459988	28.7893	22.4633	24.2957	25.1828	0	2.14842	3.8925	2.01364	3.56727	4.76016e-05	0.00168384
LOC_Os02g03030	1190846	1192461	31.4066	37.1509	39.247	35.9348	2.5308	1.07421	5.83875	3.14792	3.47801	2.31601e-06	0.000125417
LOC_Os02g03710	1558479	1559143	765.971	555.535	680.281	667.262	308.758	54.7847	106.071	156.538	2.09557	1.80835e-05	0.000747132
LOC_Os02g03720	1560693	1563343	38.3858	35.4229	51.3948	41.7345	3.79621	13.9647	11.6775	9.81281	2.06569	0.000387631	0.00976096
LOC_Os02g03750	1570082	1574900	119.519	104.541	95.314	106.458	283.45	166.502	210.195	220.049	-1.04535	0.00103358	0.021318
LOC_Os02g04240	1859994	1864612	143.074	136.508	96.2485	125.277	24.0426	27.9294	33.0862	28.3528	2.13779	1.76947e-08	1.66317e-06
LOC_Os02g04630	2070492	2075369	7.85164	1.72795	2.80335	4.12765	20.2464	27.9294	36.0056	28.0605	-2.76615	0.000192237	0.00541974
LOC_Os02g04780	2192208	2193869	26.1721	50.1105	21.4924	32.5917	86.0474	117.089	106.071	103.069	-1.65962	8.83885e-05	0.00288314
LOC_Os02g05480	2642977	2646360	612.428	590.094	636.361	612.961	1595.67	1507.12	1290.36	1464.38	-1.25622	3.59504e-08	3.12258e-06
LOC_Os02g05830	2874934	2876452	18.3205	11.2317	8.41006	12.6541	30.3697	192.284	185.867	136.173	-3.42801	2.6115e-08	2.33774e-06
LOC_Os02g06340	3166574	3170816	63.6855	231.545	52.3293	115.853	29.1043	16.1131	16.5431	20.5868	2.50174	2.07959e-05	0.000839426
LOC_Os02g06410	3204086	3206334	90.73	144.284	91.5762	108.863	350.516	204.1	245.227	266.615	-1.29011	0.0001638	0.00480053
LOC_Os02g06560	3279687	3279953	53.2167	26.7832	32.7058	37.5685	115.152	114.94	96.3393	108.81	-1.53262	8.05907e-05	0.00266791
LOC_Os02g07030	3594229	3596594	0	0	0	0	3.79621	11.8163	16.5431	10.7185	-6.04204	0.000161927	0.00476157
LOC_Os02g07180	3687919	3691368	24.4273	34.5589	19.6235	26.2032	6.32701	7.51947	2.91937	5.58862	2.24561	0.00129545	0.0256823
LOC_Os02g07550	3909437	3910014	3275.88	2973.8	3616.33	3288.67	703.564	352.341	607.23	554.378	2.56909	1.09406e-17	4.23432e-15
LOC_Os02g07600	3932584	3933222	2020.49	1432.47	1777.33	1743.43	304.962	177.245	234.523	238.91	2.86912	4.11074e-23	2.40414e-20
LOC_Os02g07624	3946045	3946543	5825.04	6388.22	6340.25	6184.51	666.867	205.174	293.884	388.642	3.99398	4.85648e-25	3.55036e-22
LOC_Os02g07628	3948762	3949211	1288.54	2400.98	2384.72	2024.75	210.057	88.0852	158.619	152.254	3.73528	3.85194e-24	2.66778e-21
LOC_Os02g09200	4724221	4726015	12.2137	19.0074	20.5579	17.2597	0	0	1.94625	0.64875	4.60159	0.000386213	0.00975467
LOC_Os02g09300	4787847	4789277	4.36202	10.3677	12.1479	8.95919	0	0	0	0	5.47036	0.000771927	0.0170875
LOC_Os02g09310	4791457	4793241	526.06	698.955	602.721	609.245	74.6587	38.6715	63.2531	58.8611	3.37588	3.28763e-26	2.62194e-23
LOC_Os02g09380	4820464	4822685	370.772	234.137	211.186	272.032	136.663	135.35	130.399	134.138	1.02069	0.00130179	0.0257598
LOC_Os02g09440	4843093	4847183	123.881	46.6546	77.5595	82.6985	124.009	287.888	310.427	240.775	-1.54349	0.000509272	0.0121735
LOC_Os02g10780	5706636	5709127	305.341	160.699	253.236	239.759	725.076	667.084	601.391	664.517	-1.47061	1.08468e-06	6.41494e-05
LOC_Os02g11040	5912591	5914192	0	0.863974	0	0.287991	16.4502	111.718	162.512	96.8933	-8.25112	1.22703e-09	1.41017e-07
LOC_Os02g11790	6092981	6095907	27.0445	28.5111	17.7546	24.4367	169.564	105.273	68.1187	114.318	-2.21948	8.57877e-07	5.31524e-05
LOC_Os02g12550	6559488	6562188	61.9407	139.964	62.6082	88.1709	0	0	0	0	8.77105	7.7108e-12	1.24499e-09
LOC_Os02g12760	6680298	6683072	73.282	82.9415	63.5427	73.2554	39.2275	33.3005	20.4356	30.9879	1.25146	0.00271417	0.0452098
LOC_Os02g13290	7078703	7080035	5.23443	9.50371	1.8689	5.53568	204.995	89.1594	90.5006	128.218	-4.51806	1.03117e-14	2.66061e-12
LOC_Os02g13380	7135134	7138112	489.419	263.512	267.253	340.061	874.393	623.042	546.896	681.443	-1.00196	0.00286882	0.0468955
LOC_Os02g13520	7245015	7248672	17.4481	13.8236	8.41006	13.2272	68.3317	85.9368	97.3124	83.8603	-2.66221	4.68467e-09	4.89251e-07
LOC_Os02g13900	7548246	7551644	21.8101	41.4707	25.2302	29.5037	122.744	61.2299	81.7424	88.5721	-1.58134	0.000382073	0.00969661
LOC_Os02g14600	8057649	8059669	59725.7	107038	164284	110349	53869.4	40377.4	35966.7	43404.5	1.34616	0.000179838	0.00517265
LOC_Os02g15250	8516600	8518271	432.712	839.782	437.323	569.939	1261.61	1350.28	1165.8	1259.23	-1.1434	0.000294978	0.00776704
LOC_Os02g15560	8732273	8737878	40.1306	59.6142	63.5427	54.4292	336.597	640.229	393.142	456.656	-3.06999	3.12664e-18	1.28573e-15
LOC_Os02g15710	8854327	8854985	1678.51	2838.15	2285.67	2267.44	153.114	52.6363	79.7962	95.182	4.58027	3.81216e-33	5.28045e-30
LOC_Os02g15740	8869108	8871520	198.036	139.1	125.216	154.117	388.479	333.005	336.701	352.728	-1.19345	4.19402e-05	0.00150584
LOC_Os02g15930	9021454	9023139	259.104	273.016	199.973	244.031	441.625	922.746	876.785	747.052	-1.61463	1.29217e-06	7.44142e-05
LOC_Os02g16030	9106572	9111711	54.0891	51.8384	34.5747	46.8341	16.4502	8.59368	3.8925	9.64547	2.3131	0.000101286	0.00321936
LOC_Os02g17080	9764691	9770197	4.36202	11.2317	11.2134	8.9357	0	0	0	0	5.46697	0.00077742	0.0171502
LOC_Os02g17230	9877605	9879276	37.5134	215.993	121.479	124.995	24.0426	2.14842	5.83875	10.6766	3.58021	6.56552e-07	4.25595e-05
LOC_Os02g18000	10444560	10450976	30.5341	28.5111	30.8369	29.9607	117.682	105.273	68.1187	97.0246	-1.69211	1.5989e-05	0.000679802
LOC_Os02g18410	10714983	10716780	868.042	722.282	956.878	849.067	354.313	276.072	269.555	299.98	1.50233	8.0188e-09	7.90408e-07
LOC_Os02g18870	11009378	11014981	296.617	190.938	232.678	240.078	94.9052	99.9015	109.963	101.59	1.23935	4.83015e-05	0.00170631
LOC_Os02g19540	11414816	11416688	55.8339	39.7428	44.8537	46.8101	8.85782	8.59368	17.5162	11.6559	1.98953	0.000191874	0.00541819
LOC_Os02g19880	11693453	11698948	12.2137	35.4229	24.2957	23.9774	0	0	0	0	6.89191	8.14944e-07	5.11878e-05
LOC_Os02g20130	11860597	11860982	11.3413	6.91179	9.34451	9.19919	0	0	0	0	5.50948	0.000535972	0.0126964
LOC_Os02g20360	11997094	12002633	64.5579	267.832	88.7729	140.388	539.061	346.97	296.803	394.278	-1.48847	0.00195195	0.0352248
LOC_Os02g21300	12645460	12648014	53.2167	26.7832	33.6402	37.88	6.32701	10.7421	7.78499	8.2847	2.18649	0.000265938	0.00716373
LOC_Os02g25640	14991648	14993715	103808	133404	157482	131565	432925	338265	283707	351632	-1.41829	2.17854e-07	1.54126e-05
LOC_Os02g25820	15130358	15131464	4.36202	8.63974	7.47561	6.82579	0	0	0	0	5.07893	0.00301422	0.0488175
LOC_Os02g26470	15543703	15544246	147.436	130.46	112.134	130.01	389.744	295.408	325.024	336.725	-1.37153	9.12602e-07	5.57259e-05
LOC_Os02g28850	17074201	17082223	75.0268	254.008	72.8872	133.974	15.1848	21.4842	25.3012	20.6568	2.69084	7.62986e-07	4.85031e-05
LOC_Os02g29010	17167417	17172740	655.176	1248.44	792.415	898.677	11.3886	2.14842	5.83875	6.4586	7.16324	1.93038e-47	7.25769e-44
LOC_Os02g29580	17600936	17601543	19.1929	2.59192	3.73781	8.50754	21.5118	37.5973	71.0381	43.3824	-2.3515	0.00180586	0.0332122
LOC_Os02g30300	18025721	18027431	33.1514	34.5589	42.0503	36.5869	105.028	70.8978	71.0381	82.3214	-1.16727	0.002495	0.0424731
LOC_Os02g30600	18211533	18211742	457.14	292.023	274.729	341.297	1336.26	631.635	526.46	831.453	-1.28363	0.0008697	0.0187153
LOC_Os02g30800	18348888	18370959	790.398	1484.31	1251.23	1175.31	301.166	566.108	724.978	530.751	1.14582	0.00174197	0.0323765
LOC_Os02g31030	18537041	18540912	1807.62	917.54	1153.11	1292.76	7760.71	9914.95	7863.82	8513.16	-2.71923	2.42179e-19	1.09891e-16
LOC_Os02g32270	19053913	19054446	3.48962	0	0.934451	1.47469	30.3697	45.1168	39.8981	38.4615	-4.70176	6.09571e-08	4.93622e-06
LOC_Os02g32580	19303396	19304621	39.2582	18.1434	16.8201	24.7406	217.649	138.573	134.291	163.504	-2.72008	2.54664e-10	3.38497e-08
LOC_Os02g32840	19488188	19488950	164.012	77.7576	73.8217	105.197	582.085	293.259	289.991	388.445	-1.88277	4.81195e-06	0.000243073
LOC_Os02g33310	19789145	19790978	44.4926	44.0627	28.0335	38.8629	10.1232	7.51947	6.81187	8.15152	2.26675	9.24336e-05	0.00299221
LOC_Os02g33430	19868199	19873307	220.718	269.56	254.171	248.15	110.09	110.644	140.13	120.288	1.04253	0.000238972	0.00651736
LOC_Os02g34260	20491113	20491868	0	0	0	0	7.59241	31.1521	9.73124	16.1586	-6.62805	1.16169e-05	0.000518192
LOC_Os02g34270	20498875	20499876	7.85164	5.18384	2.80335	5.27961	41.7583	177.245	113.856	110.953	-4.38882	2.9146e-12	5.08973e-10
LOC_Os02g34810	20868260	20872079	68.0475	77.7576	43.9192	63.2415	24.0426	17.1874	20.4356	20.5552	1.62698	0.000362769	0.0093236
LOC_Os02g35060	21039611	21042737	335.876	285.111	263.515	294.834	72.1279	92.382	85.6349	83.3816	1.81982	3.02096e-10	3.95551e-08
LOC_Os02g35650	21435187	21435990	18.3205	4.31987	3.73781	8.79272	0	0	0	0	5.44597	0.00135749	0.0265034
LOC_Os02g36200	21822874	21823590	0	0	0	0	27.8389	9.66789	24.3281	20.6116	-6.97436	9.98516e-07	5.96404e-05
LOC_Os02g36320	21922917	21923963	69.7923	13.8236	10.279	31.2983	0	0	1.94625	0.64875	5.46724	4.34548e-05	0.00155739
LOC_Os02g36600	22102488	22105124	21.8101	12.9596	14.0168	16.2622	34.1659	64.4526	67.1456	55.2547	-1.76857	0.000405428	0.0101523
LOC_Os02g36670	22135516	22136944	347.217	112.317	148.578	202.704	1135.07	705.756	570.251	803.691	-1.98654	3.31224e-06	0.000173995
LOC_Os02g37010	22350068	22352009	752.012	497.649	540.113	596.591	2209.39	1286.9	1062.65	1519.65	-1.34841	5.09095e-05	0.0017817
LOC_Os02g37230	22493811	22499968	68.0475	6.91179	15.8857	30.2817	0	0	0	0	7.22914	1.02174e-06	6.07003e-05
LOC_Os02g37480	22622379	22623188	207.632	197.85	81.2973	162.26	29.1043	38.6715	34.0594	33.945	2.25526	1.78408e-07	1.28993e-05
LOC_Os02g38470	23255086	23262297	183.205	109.725	159.791	150.907	7.59241	10.7421	14.5969	10.9771	3.76058	6.39395e-17	2.21804e-14
LOC_Os02g39140	23643092	23651534	12.2137	12.0956	2.80335	9.03755	0	0	0	0	5.48643	0.000942998	0.0199661
LOC_Os02g39625	23906740	23907120	12.2137	57.8862	19.6235	29.9078	0	0	0	0	7.21163	3.4727e-07	2.33746e-05
LOC_Os02g40110	24283189	24284804	42.7478	68.2539	33.6402	48.214	306.227	161.131	130.399	199.252	-2.04281	1.69838e-06	9.5102e-05
LOC_Os02g41830	25150451	25151106	0.872404	7.77576	0	2.88272	49.3507	27.9294	31.14	36.14	-3.62628	1.93449e-05	0.00078933
LOC_Os02g41904	25190484	25191221	0	0	0.934451	0.311484	16.4502	3.22263	30.1669	16.6132	-5.70719	0.000180977	0.00518839
LOC_Os02g42850	25759839	25763028	497.27	432.851	425.175	451.766	1179.35	994.718	773.634	982.569	-1.12032	1.94586e-05	0.000792742
LOC_Os02g43250	26052820	26054216	189.312	120.092	145.774	151.726	661.805	363.083	310.427	445.105	-1.55118	1.46028e-05	0.000632099
LOC_Os02g43360	26163059	26164221	541.763	573.678	506.473	540.638	183.483	87.011	103.151	124.548	2.12312	9.76857e-11	1.38967e-08
LOC_Os02g43470	26240126	26242983	10.4689	7.77576	17.7546	11.9997	49.3507	48.3394	34.0594	43.9165	-1.87462	0.000460102	0.0111706
LOC_Os02g43594	26309385	26316083	6.97923	3.45589	1.8689	4.10134	24.0426	23.6326	31.14	26.2717	-2.67353	0.000211152	0.0058743
LOC_Os02g44080	26608361	26609658	32.279	71.7098	36.4436	46.8108	3.79621	0	0	1.2654	5.37921	1.26068e-07	9.37247e-06
LOC_Os02g44106	26638624	26639988	297.49	376.692	302.762	325.648	8.85782	1.07421	1.94625	3.95942	6.45925	1.33815e-30	1.6008e-27
LOC_Os02g44710	27091853	27092809	127.371	101.085	135.495	121.317	711.156	321.189	245.227	425.857	-1.81018	6.79839e-06	0.000330111
LOC_Os02g44820	27137204	27138314	1024.2	450.994	332.665	602.62	1684.25	1210.63	1182.35	1359.08	-1.17294	0.00308423	0.0497066
LOC_Os02g45344	27559203	27567049	381.241	290.295	270.056	313.864	611.189	745.501	607.23	654.64	-1.0604	6.23545e-05	0.00213123
LOC_Os02g45760	27853853	27856163	87.2404	163.291	129.889	126.807	558.042	227.732	192.679	326.151	-1.36092	0.00164504	0.0310129
LOC_Os02g45940	27993898	27994741	261.721	129.596	71.0183	154.112	58.2085	11.8163	58.3875	42.8041	1.84996	0.00138539	0.0268687
LOC_Os02g46290	28224916	28225634	2030.08	1597.49	1653.98	1760.52	528.938	299.704	209.222	345.955	2.34959	1.08868e-11	1.71568e-09
LOC_Os02g46620	28453885	28454909	22.6825	18.1434	12.1479	17.6579	45.5545	71.972	48.6562	55.3942	-1.6477	0.000565048	0.0132069
LOC_Os02g46650	28472825	28478009	79.3888	76.8936	67.2805	74.521	10.1232	16.1131	22.3819	16.2061	2.18337	1.47581e-06	8.38885e-05
LOC_Os02g46680	28487549	28498680	165.757	291.159	200.907	219.274	105.028	85.9368	90.5006	93.8219	1.22661	0.000197178	0.00553233
LOC_Os02g46810	28574011	28574592	279.169	85.5334	131.758	165.487	58.2085	71.972	66.1725	65.451	1.33732	0.0025958	0.0436525
LOC_Os02g47110	28755170	28758865	197.163	251.416	240.154	229.578	633.967	809.954	527.433	657.118	-1.51707	4.72897e-08	3.93851e-06
LOC_Os02g47130	28768769	28772100	89.8576	421.619	154.184	221.887	50.6161	40.82	54.495	48.6437	2.18959	1.60869e-05	0.000682865
LOC_Os02g47150	28777004	28784587	351.579	1098.11	498.063	649.251	268.265	238.475	284.152	263.631	1.30032	0.00105804	0.0217346
LOC_Os02g47180	28802793	28805992	543.508	914.084	402.749	620.113	46.8199	162.206	229.657	146.228	2.08086	1.70509e-05	0.000710992
LOC_Os02g47370	28921176	28921795	21.8101	18.1434	8.41006	16.1212	88.5782	48.3394	39.8981	58.9386	-1.86062	0.000504583	0.0120834
LOC_Os02g47600	29081821	29086715	213.739	180.57	187.825	194.045	306.227	523.14	430.121	419.829	-1.11436	0.000152491	0.00453701
LOC_Os02g48094	29438332	29440658	0	0	0.934451	0.311484	3.79621	10.7421	14.5969	9.71172	-4.9386	0.00182519	0.0334043
LOC_Os02g48480	29677821	29678633	2597.15	2278.3	2128.68	2334.71	13899.2	4091.66	3311.54	7100.8	-1.60462	0.000422656	0.0105137
LOC_Os02g48570	29736163	29741713	400.434	287.703	258.843	315.66	892.109	870.11	666.59	809.603	-1.35818	1.41138e-06	8.05742e-05
LOC_Os02g48850	29886240	29887103	233.804	671.307	681.215	528.776	0	0	1.94625	0.64875	9.51805	1.1269e-17	4.29823e-15
LOC_Os02g49860	30468750	30470088	6.10683	12.0956	4.67226	7.62491	53.1469	48.3394	50.6025	50.6963	-2.72577	7.11515e-07	4.53406e-05
LOC_Os02g50140	30631239	30632768	1840.77	2000.96	1785.74	1875.82	53.1469	20.41	10.7044	28.0871	6.08846	1.88331e-46	6.19563e-43
LOC_Os02g50630	30924455	30927914	89.8576	131.324	53.2637	91.4818	7.59241	12.8905	17.5162	12.6664	2.83511	4.28142e-08	3.61148e-06
LOC_Os02g50700	30971577	30972889	34.0238	70.8458	47.657	50.8422	94.9052	124.608	124.56	114.691	-1.17473	0.00227102	0.0396607
LOC_Os02g50910	31120608	31124019	102.944	215.993	136.43	151.789	37.9621	34.3747	69.0918	47.1429	1.68101	7.36487e-05	0.00246601
LOC_Os02g51040	31220568	31222229	322.79	438.899	227.072	329.587	1018.65	552.144	572.197	714.33	-1.1148	0.0014894	0.0286326
LOC_Os02g51470	31526904	31528541	102.071	98.493	77.5595	92.7079	40.4929	23.6326	31.14	31.7552	1.55278	7.57893e-05	0.00252484
LOC_Os02g51480	31529599	31531859	84.6232	90.7172	72.8872	82.7425	32.9005	26.8552	36.9787	32.2448	1.35858	0.000378076	0.00965101
LOC_Os02g51890	31781325	31787892	82.006	82.9415	99.0518	87.9998	183.483	185.838	209.222	192.848	-1.13338	9.06212e-05	0.00294441
LOC_Os02g51970	31823825	31825264	13.9585	29.3751	14.9512	19.4283	1.2654	0	0.973124	0.746176	4.734	0.000177722	0.00512298
LOC_Os02g52430	32088082	32090304	735.437	718.826	719.527	724.597	2353.65	1303.02	975.071	1543.91	-1.09081	0.00116252	0.0233907
LOC_Os02g52460	32095322	32098710	162.267	174.523	167.267	168.019	107.559	55.8589	80.7693	81.3958	1.04983	0.00183891	0.0336321
LOC_Os02g52510	32125277	32134832	50.5994	108.861	68.2149	75.8917	21.5118	33.3005	33.0862	29.2995	1.36714	0.00251789	0.0427246
LOC_Os02g52550	32155213	32156482	34.8962	38.0148	18.689	30.5333	5.06161	3.22263	5.83875	4.70766	2.69611	0.000115691	0.00359052
LOC_Os02g52850	32312866	32315992	1.74481	8.63974	13.0823	7.82229	0	0	0	0	5.27373	0.00248371	0.0423906
LOC_Os02g53410	32686077	32686828	83.7508	69.9819	68.2149	73.9825	334.066	284.666	191.705	270.146	-1.86629	9.34336e-09	9.10736e-07
LOC_Os02g53720	32886843	32889742	117.775	35.4229	49.5259	67.5745	121.479	374.899	368.814	288.397	-2.09432	3.5071e-05	0.00129711
LOC_Os02g54140	33179486	33180458	294.873	579.726	275.663	383.421	711.156	1096.77	802.828	870.251	-1.18236	0.000682119	0.0154759
LOC_Os02g54280	33279514	33295107	551.359	425.939	438.258	471.852	86.0474	206.248	227.711	173.336	1.44126	8.72419e-05	0.00287723
LOC_Os02g54390	33330509	33331432	950.048	912.356	618.607	827.004	10.1232	0	4.86562	4.99628	7.43092	5.63678e-46	1.64832e-42
LOC_Os02g54960	33663555	33667490	12335.8	13923.8	13158.9	13139.5	1655.15	696.088	1231	1194.08	3.46032	4.55732e-27	3.86902e-24
LOC_Os02g55080	33734390	33737329	667.389	625.517	790.546	694.484	1632.37	1550.08	1651.39	1611.28	-1.21437	1.13905e-07	8.54059e-06
LOC_Os02g55210	33815812	33818376	17.4481	101.085	30.8369	49.79	0	0	0	0	7.94675	8.8333e-09	8.64219e-07
LOC_Os02g55230	33824477	33828248	162.267	333.494	211.186	235.649	10.1232	8.59368	6.81187	8.50959	4.80568	5.38204e-24	3.63191e-21
LOC_Os02g55410	33936188	33940538	265.211	401.748	334.534	333.831	111.355	124.608	143.049	126.338	1.39979	1.99398e-06	0.000110479
LOC_Os02g55880	34206868	34209854	123.881	117.5	87.8384	109.74	249.284	209.471	224.792	227.849	-1.05241	0.00031597	0.00828257
LOC_Os02g55910	34223117	34227621	226.825	90.7172	127.085	148.209	447.952	613.374	483.643	514.99	-1.79691	6.59814e-07	4.26658e-05
LOC_Os02g56100	34328237	34333226	88.9852	145.148	81.2973	105.143	7.59241	15.0389	30.1669	17.5994	2.55661	4.77356e-07	3.15655e-05
LOC_Os02g56130	34351407	34353656	362.048	520.112	342.009	408.056	175.891	147.167	137.211	153.423	1.41336	1.57105e-06	8.89183e-05
LOC_Os02g56540	34632308	34636638	20.0653	145.148	42.0503	69.0877	7.59241	6.44526	9.73124	7.92297	3.12062	1.28008e-05	0.000560553
LOC_Os02g56720	34769644	34771189	13.9585	11.2317	4.67226	9.95413	84.782	49.4136	36.0056	56.7337	-2.49939	1.33574e-05	0.000582983
LOC_Os02g57120	34981044	34989879	10.4689	45.7906	18.689	24.9828	0	6.44526	4.86562	3.77029	2.69239	0.00286692	0.0468935
LOC_Os02g57840	35424002	35425624	45.365	27.6472	24.2957	32.436	97.436	91.3078	119.694	102.813	-1.66381	2.60871e-05	0.00100965
LOC_Os02g58210	35624137	35630806	45.365	168.475	65.4116	93.0838	16.4502	22.5584	29.1937	22.7341	2.02703	0.000195848	0.00550088
LOC_Os02g58220	35639745	35642575	88.9852	151.195	99.0518	113.077	41.7583	19.3358	35.0325	32.0422	1.82456	1.70073e-05	0.000710471
LOC_Os02g58740	35890339	35891495	116.03	122.684	57.0015	98.5718	18.981	7.51947	18.4894	14.9966	2.72104	6.60392e-08	5.28274e-06
LOC_Os03g01880	537609	542771	69.7923	31.967	20.5579	40.7724	3.79621	6.44526	11.6775	7.30632	2.45749	0.000347308	0.00897003
LOC_Os03g02180	726213	728004	31.4066	154.651	28.0335	71.3638	1232.5	432.906	379.518	681.642	-3.25501	0.000453436	0.0110496
LOC_Os03g02290	788208	791596	121.264	179.707	94.3796	131.783	32.9005	42.9684	53.5218	43.1302	1.6058	4.57403e-05	0.00162675
LOC_Os03g02514	922684	928190	832.274	1195.74	1153.11	1060.38	3472.26	2444.9	1813.9	2577.02	-1.28089	2.88536e-05	0.00110053
LOC_Os03g02860	1124956	1127202	17.4481	12.0956	12.1479	13.8972	78.4549	50.4878	52.5487	60.4972	-2.11688	8.39136e-06	0.000394364
LOC_Os03g02874	1131615	1135170	34.8962	16.4155	16.8201	22.7106	113.886	229.881	147.915	163.894	-2.85062	1.01603e-10	1.43762e-08
LOC_Os03g02980	1211679	1217861	438.819	362.005	382.191	394.338	956.644	1377.14	1165.8	1166.53	-1.56499	9.45412e-10	1.12078e-07
LOC_Os03g03654	1619519	1620294	3.48962	0	0	1.16321	50.6161	17.1874	13.6237	27.1424	-4.51933	3.51789e-05	0.00129851
LOC_Os03g03660	1624879	1629530	767.716	781.896	861.564	803.725	1976.56	2286.99	1810.98	2024.84	-1.33307	6.29732e-09	6.37434e-07
LOC_Os03g03810	1714572	1715230	61704.3	20054.6	22519.3	34759.4	128698	115148	111476	118441	-1.76869	8.3178e-06	0.000392308
LOC_Os03g03880	1765300	1770693	79.3888	101.085	99.9863	93.4867	201.199	193.358	170.297	188.284	-1.00941	0.000587202	0.0135919
LOC_Os03g03910	1787648	1790957	24.4273	12.0956	24.2957	20.2729	59.4739	93.4562	67.1456	73.3586	-1.85898	4.65403e-05	0.00165297
LOC_Os03g04080	1870803	1871503	13.0861	25.9192	8.41006	15.8051	51.8815	151.464	180.028	127.791	-3.01401	4.0774e-08	3.45045e-06
LOC_Os03g04110	1878906	1881754	92.4748	154.651	55.1326	100.753	16.4502	39.7458	32.1131	29.4364	1.76829	0.000347797	0.00897384
LOC_Os03g04220	1938202	1939691	5.23443	0.863974	7.47561	4.52467	27.8389	25.781	19.4625	24.3608	-2.43614	0.00134459	0.02631
LOC_Os03g04570	2131972	2136725	229.442	270.424	313.041	270.969	0	5.37105	1.94625	2.4391	6.74112	5.665e-26	4.38504e-23
LOC_Os03g04770	2272965	2276401	221.591	442.354	238.285	300.743	525.142	962.492	836.887	774.84	-1.36555	0.00012582	0.00383699
LOC_Os03g04940	2380026	2384652	692.689	623.789	682.149	666.209	201.199	230.955	281.233	237.796	1.48424	6.55227e-09	6.60699e-07
LOC_Os03g05334	2608931	2609586	47.1098	14.6876	14.9512	25.5829	137.929	163.28	132.345	144.518	-2.49561	1.12312e-07	8.44524e-06
LOC_Os03g05910	2961746	2964306	95.9645	106.269	54.1982	85.4771	16.4502	13.9647	10.7044	13.7064	2.65231	3.18766e-08	2.80578e-06
LOC_Os03g06170	3095752	3096978	26.1721	15.5515	9.34451	17.0227	134.133	133.202	144.022	137.119	-3.00516	1.02349e-12	1.95189e-10
LOC_Os03g06330	3165266	3168965	332.386	344.725	305.566	327.559	1017.38	1450.18	1085.03	1184.2	-1.85411	3.87104e-13	7.54653e-11
LOC_Os03g06670	3371374	3372410	143.074	151.195	66.346	120.205	49.3507	15.0389	26.2744	30.2213	2.00363	5.43622e-05	0.0018863
LOC_Os03g06970	3555490	3558352	4612.4	6195.55	7230.78	6012.91	46.8199	5.37105	39.8981	30.6963	7.61966	1.13879e-57	5.99412e-54
LOC_Os03g07000	3569977	3571884	613.3	645.388	468.16	575.616	213.853	137.499	179.055	176.802	1.70482	3.57125e-09	3.83625e-07
LOC_Os03g07140	3653709	3657820	16.5757	51.8384	17.7546	28.7229	2.5308	1.07421	1.94625	1.85042	3.97459	2.47063e-05	0.00096472
LOC_Os03g07170	3674147	3679317	52.3443	69.1179	90.6418	70.7013	321.412	261.033	191.705	258.05	-1.86751	6.15033e-08	4.96516e-06
LOC_Os03g07226	3694441	3698200	3595.18	3312.47	3305.15	3404.27	10772.4	6985.58	6746.67	8168.21	-1.26258	2.00119e-06	0.000110644
LOC_Os03g07300	3713491	3717958	222.463	203.034	220.531	215.342	465.668	539.253	424.282	476.401	-1.14548	5.26845e-06	0.000262108
LOC_Os03g07510	3814371	3823216	45.365	29.3751	13.0823	29.2741	8.85782	6.44526	4.86562	6.7229	2.13927	0.00243976	0.0419123
LOC_Os03g07810	3974957	3977415	22.6825	82.0775	28.968	44.576	7.59241	8.59368	11.6775	9.28786	2.25531	0.00055982	0.013143
LOC_Os03g07890	4014426	4016478	78.5164	204.762	164.463	149.247	659.275	340.524	280.26	426.686	-1.51432	0.000346042	0.00896371
LOC_Os03g08290	4222083	4223993	13.9585	17.2795	26.1646	19.1342	0	1.07421	0	0.35807	5.60307	6.10464e-05	0.00209468
LOC_Os03g08790	4541351	4543107	3.48962	6.04781	5.60671	5.04805	18.981	32.2263	54.495	35.2341	-2.81182	3.50916e-05	0.00129711
LOC_Os03g09850	4901969	4903749	6.10683	5.18384	4.67226	5.32098	32.9005	29.0037	26.2744	29.3928	-2.46142	0.000101408	0.00321936
LOC_Os03g09970	4984577	4992411	77.644	69.1179	81.2973	76.0197	16.4502	26.8552	26.2744	23.1933	1.70258	3.99545e-05	0.00145238
LOC_Os03g10640	5433906	5440327	27.9169	44.0627	37.3781	36.4525	180.953	296.482	192.679	223.371	-2.61589	4.04355e-13	7.76776e-11
LOC_Os03g10680	5458096	5462607	105.561	169.339	142.037	138.979	322.678	387.79	317.239	342.569	-1.30158	9.53312e-06	0.000440163
LOC_Os03g10730	5479286	5480808	117.775	85.5334	111.2	104.836	35.4313	31.1521	39.8981	35.4938	1.56054	2.16531e-05	0.000864744
LOC_Os03g11180	5755353	5755913	38.3858	178.843	40.1814	85.8032	1.2654	0	0	0.421801	7.77009	7.37472e-09	7.35182e-07
LOC_Os03g11540	5979594	5983099	205.887	400.02	299.024	301.644	41.7583	40.82	44.7637	42.4473	2.82819	1.13535e-15	3.32e-13
LOC_Os03g11560	5994130	5997434	529.549	533.072	649.444	570.688	1489.38	2001.25	1637.77	1709.47	-1.58308	1.49733e-10	2.0418e-08
LOC_Os03g11690	6115338	6118762	49.727	48.3825	40.1814	46.097	5.06161	11.8163	24.3281	13.7353	1.72203	0.00274464	0.0454013
LOC_Os03g12110	6354859	6357807	432.712	1089.47	1054.06	858.748	22.7772	18.2616	18.4894	19.8427	5.44093	1.06281e-38	2.33093e-35
LOC_Os03g12120	6358095	6365595	289.638	381.012	380.322	350.324	112.621	163.28	174.189	150.03	1.22027	4.08403e-05	0.00147845
LOC_Os03g12140	6369445	6373705	347.217	235.865	148.578	243.886	88.5782	52.6363	93.4199	78.2115	1.64146	3.11699e-05	0.00118033
LOC_Os03g12290	6457910	6462727	471.098	680.811	334.534	495.481	2377.69	1145.11	997.452	1506.75	-1.6039	3.29952e-05	0.00124052
LOC_Os03g13030	7043271	7046130	1642.74	1651.92	1221.33	1505.33	626.374	417.868	450.557	498.266	1.59619	6.05025e-09	6.17172e-07
LOC_Os03g13540	7322330	7325484	1548.52	1192.28	1398.87	1379.89	3645.62	3952.02	3350.47	3649.37	-1.40308	1.34406e-09	1.53129e-07
LOC_Os03g14000	7591868	7597447	540.018	446.674	374.715	453.803	1214.79	1415.81	1219.32	1283.31	-1.49953	2.79234e-09	3.02423e-07
LOC_Os03g14050	7626455	7629682	105.561	174.523	142.037	140.707	397.336	307.224	204.356	302.972	-1.1047	0.00137402	0.0266874
LOC_Os03g14180	7697015	7698284	78.5164	244.505	142.971	155.331	659.275	1088.17	620.853	789.434	-2.34528	7.819e-09	7.73611e-07
LOC_Os03g14500	7871494	7873384	39.2582	37.1509	36.4436	37.6176	7.59241	13.9647	5.83875	9.13196	2.04401	0.00038022	0.00966824
LOC_Os03g14590	7914497	7918255	321.917	368.053	428.913	372.961	1081.92	945.304	738.601	921.942	-1.30534	1.04326e-06	6.1839e-05
LOC_Os03g14642	7958992	7959882	0.872404	0	0	0.290801	7.59241	10.7421	6.81187	8.38213	-4.71665	0.00297212	0.0482245
LOC_Os03g15180	8294689	8306264	252.997	209.946	255.105	239.349	306.227	558.589	635.45	500.089	-1.06449	0.00106121	0.0217346
LOC_Os03g15810	8720361	8728030	110.795	181.434	153.25	148.493	22.7772	58.0073	87.5812	56.1219	1.39458	0.0022389	0.039256
LOC_Os03g15870	8753551	8756023	157.033	136.508	112.134	135.225	65.8009	42.9684	70.0649	59.6114	1.18225	0.000774693	0.0171277
LOC_Os03g15960	8805567	8806601	807.846	2140.06	1188.62	1378.84	3167.3	3598.6	2872.66	3212.86	-1.22033	0.000490852	0.0118216
LOC_Os03g16020	8833913	8834377	449.288	1039.36	383.125	623.924	2194.21	2964.82	1935.54	2364.86	-1.92209	5.20797e-07	3.40954e-05
LOC_Os03g16030	8834823	8835802	67.1751	244.505	78.4939	130.058	493.507	1055.95	572.197	707.217	-2.44245	3.01051e-07	2.06868e-05
LOC_Os03g16040	8838031	8838510	55.8339	158.971	69.1494	94.6515	202.464	352.341	171.27	242.025	-1.3537	0.00234841	0.0407687
LOC_Os03g16140	8902704	8906354	1625.29	960.739	1250.3	1278.77	3400.14	2337.48	2305.33	2680.98	-1.06782	0.000278184	0.00744785
LOC_Os03g16410	9051855	9052322	82.006	54.4303	60.7393	65.7252	273.327	127.831	108.017	169.725	-1.36495	0.00110373	0.0224483
LOC_Os03g16920	9411494	9416082	289.638	680.811	430.782	467.077	2961.04	3320.38	2554.45	2945.29	-2.65653	7.10586e-16	2.10126e-13
LOC_Os03g17100	9498900	9499826	450.161	982.338	439.192	623.897	413.787	99.9015	169.324	227.671	1.45671	0.00267275	0.0446045
LOC_Os03g17164	9546132	9550718	141.329	234.137	103.724	159.73	26.5734	44.0426	79.7962	50.1374	1.66346	0.000322508	0.00841206
LOC_Os03g17470	9712370	9714748	1824.2	3847.27	4272.31	3314.59	530.204	300.779	431.094	420.692	2.97854	9.75698e-17	3.2098e-14
LOC_Os03g17790	9899758	9900400	683.965	899.396	872.777	818.713	4122.68	2919.7	2122.38	3054.92	-1.8995	2.68185e-10	3.54679e-08
LOC_Os03g17800	9904420	9907008	44.4926	28.5111	30.8369	34.6135	117.682	163.28	133.318	138.093	-1.99652	3.83219e-08	3.30674e-06
LOC_Os03g17960	9999633	10002142	6.10683	60.4781	14.0168	26.8672	1.2654	4.29684	3.8925	3.15158	3.06908	0.00152376	0.0290387
LOC_Os03g18110	10105981	10108026	28.7893	12.0956	5.60671	15.4972	161.972	176.17	85.6349	141.259	-3.18189	2.06198e-09	2.2706e-07
LOC_Os03g19190	10752594	10759931	151.798	185.754	129.889	155.814	69.5971	75.1947	74.9306	73.2408	1.08865	0.000577214	0.0134122
LOC_Os03g19720	11093668	11094189	86.368	126.14	78.4939	97.0007	313.82	249.217	145.969	236.335	-1.28193	0.000537672	0.0127252
LOC_Os03g19900	11184216	11189385	116.902	183.162	90.6418	130.235	22.7772	19.3358	19.4625	20.5252	2.67033	3.60583e-10	4.63497e-08
LOC_Os03g20120	11367199	11368919	5.23443	0.863974	1.8689	2.65577	17.7156	40.82	36.9787	31.8381	-3.58477	7.59797e-06	0.00036357
LOC_Os03g20550	11650824	11652144	27.0445	23.3273	21.4924	23.9547	3.79621	5.37105	6.81187	5.32637	2.15238	0.00170619	0.0319143
LOC_Os03g20680	11699262	11700672	465.864	887.301	464.422	605.862	1676.66	1588.76	1377.94	1547.79	-1.35282	1.68501e-05	0.000708406
LOC_Os03g20910	11845060	11849005	1.74481	0	0	0.581603	2.5308	15.0389	38.925	18.8316	-5.00699	0.00047525	0.0115172
LOC_Os03g21160	12068075	12071899	0	0	0	0	1.2654	31.1521	20.4356	17.6177	-6.75621	2.28646e-05	0.000900825
LOC_Os03g21380	12223886	12226100	96.8369	39.7428	47.657	61.4122	368.232	272.849	219.926	287.002	-2.22254	1.98012e-08	1.83496e-06
LOC_Os03g21650	12359258	12359722	82.006	90.7172	59.8049	77.5094	317.616	211.619	151.807	227.014	-1.54686	2.29216e-05	0.000901722
LOC_Os03g21970	12587544	12589847	0	0	0	0	2.5308	10.7421	20.4356	11.2362	-6.11139	0.000180558	0.00518203
LOC_Os03g22170	12713329	12714584	0	0	2.80335	0.934451	15.1848	17.1874	7.78499	13.3857	-3.88137	0.00191994	0.0348716
LOC_Os03g22690	13100324	13109352	707.52	814.727	702.707	741.651	310.024	385.641	395.088	363.584	1.02742	2.94048e-05	0.00111751
LOC_Os03g24590	14006155	14007356	30.5341	23.3273	20.5579	24.8065	2.5308	0	0.973124	1.16798	4.48623	2.09285e-05	0.000842196
LOC_Os03g25350	14491736	14492430	16882.8	30193.3	16250.1	21108.7	3235.63	1119.33	1721.46	2025.47	3.38178	1.53424e-17	5.68705e-15
LOC_Os03g26870	15329520	15334903	299.235	242.777	176.611	239.541	288.512	661.713	652.966	534.397	-1.15833	0.00169026	0.0317064
LOC_Os03g27420	15727278	15732159	12.2137	24.1913	21.4924	19.2991	0	0	0	0	6.57836	3.22174e-06	0.00016958
LOC_Os03g29340	16692517	16698316	17.4481	31.103	37.3781	28.6431	44.2891	96.6789	99.2587	80.0755	-1.48918	0.00173315	0.032281
LOC_Os03g29950	17067788	17072249	42.7478	11.2317	19.6235	24.5343	3.79621	0	1.94625	1.91415	3.7263	0.00017685	0.00510343
LOC_Os03g30130	17207293	17210591	156.16	198.714	164.463	173.113	326.474	474.801	573.17	458.148	-1.40522	3.5328e-06	0.000184476
LOC_Os03g30470	17390790	17391871	126.499	120.956	99.0518	115.502	37.9621	13.9647	21.4087	24.4452	2.25576	1.5231e-07	1.11657e-05
LOC_Os03g31390	17882918	17883645	15.7033	9.50371	1.8689	9.0253	0	0	0	0	5.48445	0.00125556	0.0249954
LOC_Os03g31630	18053010	18055376	721.478	1602.67	1090.5	1138.22	110.09	16.1131	30.1669	52.1233	4.45963	7.60852e-17	2.56719e-14
LOC_Os03g31940	18277622	18278859	17.4481	28.5111	14.9512	20.3035	2.5308	0	1.94625	1.49235	3.79386	0.000192341	0.00541974
LOC_Os03g32150	18391035	18392132	0.872404	0	1.8689	0.913769	1.2654	1.07421	56.4412	19.5936	-4.44881	0.00303043	0.0489595
LOC_Os03g33420	19099749	19102100	0	0	0	0	12.654	4.29684	3.8925	6.94779	-5.39699	0.0020856	0.0372303
LOC_Os03g37490	20793053	20799805	208.505	337.814	271.925	272.748	74.6587	94.5304	105.097	91.4289	1.57355	8.34732e-07	5.2058e-05
LOC_Os03g37640	20868325	20875717	19.1929	23.3273	21.4924	21.3375	26.5734	92.382	96.3393	71.7649	-1.75532	0.000889208	0.0190417
LOC_Os03g37810	20961327	20962190	3.48962	11.2317	9.34451	8.02193	0	0	0	0	5.31173	0.00151956	0.0290015
LOC_Os03g38010	21102128	21106012	87.2404	116.636	85.9695	96.6155	18.981	11.8163	27.2475	19.3483	2.31333	1.43005e-07	1.05423e-05
LOC_Os03g38050	21117886	21123456	205.887	245.368	312.107	254.454	650.417	1050.58	909.871	870.288	-1.77498	1.90418e-09	2.12348e-07
LOC_Os03g39020	21687251	21693162	69.7923	268.696	90.6418	143.043	31.6351	26.8552	64.2262	40.9055	1.80129	0.000934707	0.0198384
LOC_Os03g39710	22091999	22095372	15.7033	28.5111	12.1479	18.7874	0	0	1.94625	0.64875	4.7265	0.000275317	0.00740403
LOC_Os03g41050	22815635	22816468	7.85164	17.2795	9.34451	11.4919	58.2085	38.6715	33.0862	43.3221	-1.90671	0.000567352	0.013249
LOC_Os03g41100	22845483	22847345	199.781	218.585	119.61	179.325	29.1043	12.8905	11.6775	17.8908	3.34964	1.07425e-13	2.35601e-11
LOC_Os03g41200	22911337	22918539	723.223	568.495	611.131	634.283	1083.18	1192.37	1565.76	1280.44	-1.01382	9.53233e-05	0.00307065
LOC_Os03g41879	23264430	23264876	0	0	0	0	7.59241	13.9647	30.1669	17.2413	-6.72725	5.63813e-06	0.000278918
LOC_Os03g42130	23450164	23452171	2775.12	5283.2	5728.19	4595.5	3083.79	1321.28	1534.62	1979.89	1.21508	0.00150659	0.0288576
LOC_Os03g42480	23633268	23640082	210.249	96.765	74.7561	127.257	48.0853	50.4878	44.7637	47.779	1.41448	0.00140401	0.0271896
LOC_Os03g42520	23655935	23658301	3.48962	9.50371	0	4.33111	34.1659	133.202	117.748	95.0386	-4.44204	1.30397e-09	1.49208e-07
LOC_Os03g42670	23768899	23771242	83.7508	41.4707	72.8872	66.0362	12.654	24.7068	24.3281	20.563	1.67176	0.000585085	0.0135548
LOC_Os03g43820	24564911	24565759	10758.5	9063.08	8791.32	9537.63	2580.16	1394.32	2123.36	2032.61	2.23049	4.75925e-15	1.33249e-12
LOC_Os03g44890	25326521	25330063	18.3205	77.7576	24.2957	40.1246	7.59241	9.66789	4.86562	7.37531	2.45127	0.000616068	0.0141102
LOC_Os03g45760	25846175	25849240	36.641	73.4378	29.9024	46.6604	2.5308	4.29684	9.73124	5.51963	3.04459	6.97955e-06	0.000337042
LOC_Os03g46090	26064147	26069039	8.72404	25.0552	13.0823	15.6205	58.2085	42.9684	63.2531	54.81	-1.80901	0.000487998	0.011772
LOC_Os03g46640	26396243	26397459	146.564	162.427	156.988	155.326	108.825	48.3394	50.6025	69.2555	1.17373	0.00232569	0.0404545
LOC_Os03g46884	26517626	26520264	5.23443	0.863974	1.8689	2.65577	275.858	242.771	235.496	251.375	-6.55864	1.24434e-29	1.25956e-26
LOC_Os03g47990	27283074	27286338	22.6825	19.0074	14.9512	18.8804	63.2701	50.4878	63.2531	59.0037	-1.6414	0.000194691	0.00547468
LOC_Os03g48626	27723754	27729054	1624.42	960.739	1185.82	1256.99	828.839	447.945	510.89	595.891	1.0778	0.000924909	0.0196649
LOC_Os03g49200	28023221	28026612	27.0445	66.526	35.5091	43.0265	0	0	1.94625	0.64875	5.90898	6.94151e-07	4.45577e-05
LOC_Os03g49630	28260581	28266479	281.787	429.395	405.552	372.244	637.763	843.254	810.613	763.877	-1.03762	0.000182184	0.00521733
LOC_Os03g49720	28304985	28307930	44.4926	19.0074	32.7058	32.0686	92.3744	123.534	129.426	115.111	-1.8462	6.87097e-06	0.000332408
LOC_Os03g49830	28390076	28392181	13.9585	14.6876	8.41006	12.352	0	0	1.94625	0.64875	4.12895	0.00265888	0.0445142
LOC_Os03g50280	28655240	28657434	172.736	64.798	70.0838	102.539	296.104	372.751	221.872	296.909	-1.5329	0.000227348	0.00623916
LOC_Os03g51530	29479234	29479886	10.4689	12.0956	17.7546	13.4397	156.91	51.5621	25.3012	77.9244	-2.53183	7.30911e-05	0.00245359
LOC_Os03g51600	29526111	29529118	47073.2	22093.5	24007	31057.9	91082.4	67083.3	57684.9	71950.2	-1.21203	0.000377719	0.00965101
LOC_Os03g51670	29585925	29591307	63.6855	29.3751	37.3781	43.4796	113.886	118.163	140.13	124.06	-1.51313	0.000102986	0.00325778
LOC_Os03g51920	29784613	29787015	1.74481	6.04781	2.80335	3.53199	20.2464	50.4878	23.355	31.3631	-3.14768	3.50353e-05	0.00129711
LOC_Os03g52390	30078324	30078929	16.5757	6.91179	5.60671	9.69806	48.0853	37.5973	38.925	41.5359	-2.09233	0.000292769	0.00772827
LOC_Os03g52650	30192884	30194132	47.1098	181.434	39.247	89.2637	26.5734	9.66789	21.4087	19.2167	2.22147	0.000413621	0.0103182
LOC_Os03g53340	30603964	30607164	180.588	226.361	61.6738	156.208	722.545	1949.69	1131.74	1267.99	-3.02037	5.62144e-11	8.21917e-09
LOC_Os03g53390	30632873	30636506	155.288	71.7098	59.8049	95.6009	264.469	326.56	313.346	301.458	-1.65632	1.65776e-05	0.00069918
LOC_Os03g53400	30639022	30640147	540.891	331.766	248.564	373.74	1176.82	1312.68	1066.54	1185.35	-1.66482	2.14535e-07	1.52187e-05
LOC_Os03g53610	30740857	30741767	79.3888	31.967	28.0335	46.4631	146.787	153.612	174.189	158.196	-1.7665	3.80841e-05	0.00139402
LOC_Os03g53620	30743107	30743972	65.4303	47.5185	32.7058	48.5516	211.322	135.35	200.464	182.379	-1.90693	3.12986e-07	2.1451e-05
LOC_Os03g53690	30788422	30789523	0	0	0	0	8.85782	8.59368	17.5162	11.6559	-6.15949	6.34163e-05	0.00215632
LOC_Os03g53900	30901299	30903035	1401.08	2435.54	2270.72	2035.78	7872.07	3315.01	3021.55	4736.21	-1.21801	0.0017692	0.0326978
LOC_Os03g53920	30910865	30919482	128.243	427.667	202.776	252.895	27.8389	46.191	72.9843	49.0047	2.36059	1.13268e-06	6.66085e-05
LOC_Os03g54860	31180590	31190830	168.374	107.997	117.741	131.371	48.0853	64.4526	42.8175	51.7851	1.34366	0.000224718	0.0061928
LOC_Os03g55540	31604952	31606236	7.85164	12.0956	13.0823	11.0099	35.4313	44.0426	25.3012	34.925	-1.66519	0.0028318	0.0464925
LOC_Os03g55734	31732515	31733054	1663.67	562.447	600.852	942.325	5567.77	3297.82	2718.91	3861.5	-2.03469	2.3105e-06	0.000125377
LOC_Os03g55740	31735440	31736253	791.271	404.34	456.012	550.541	2468.8	1124.7	942.957	1512.15	-1.45718	0.000290034	0.00767918
LOC_Os03g55776	31757959	31758807	8.72404	0.863974	5.60671	5.06491	63.2701	46.191	50.6025	53.3545	-3.39883	8.35476e-08	6.48139e-06
LOC_Os03g55980	31867211	31867926	5.23443	9.50371	14.9512	9.89645	77.1895	24.7068	29.1937	43.6967	-2.1398	0.000914754	0.0194935
LOC_Os03g56320	32107038	32110407	257.359	247.96	179.415	228.245	449.218	616.596	644.208	570.007	-1.32069	3.69261e-06	0.000191681
LOC_Os03g56590	32237954	32240951	156.16	156.379	68.2149	126.918	43.0237	29.0037	41.8443	37.9572	1.74365	4.98138e-05	0.00175502
LOC_Os03g56700	32307071	32308362	18.3205	19.8714	10.279	16.1569	2.5308	1.07421	1.94625	1.85042	3.14421	0.00132801	0.0261411
LOC_Os03g56782	32354344	32354559	37.5134	95.0371	40.1814	57.5773	21.5118	15.0389	17.5162	18.0223	1.68139	0.00161237	0.0304845
LOC_Os03g56800	32365742	32371274	369.027	584.91	449.471	467.803	210.057	131.054	135.264	158.792	1.56192	8.58615e-07	5.31524e-05
LOC_Os03g57660	32859060	32866608	704.903	1108.48	839.137	884.173	444.156	372.751	450.557	422.488	1.06554	8.88007e-05	0.0028924
LOC_Os03g57840	32951544	32956889	501.632	766.345	802.694	690.224	432.768	284.666	301.669	339.701	1.02404	0.000739605	0.0165659
LOC_Os03g57960	33020035	33022949	12013	11420	10051.9	11161.6	28751.2	26620	24455.6	26608.9	-1.25334	1.05621e-08	1.02573e-06
LOC_Os03g58180	33137576	33138019	40.1306	23.3273	13.0823	25.5134	69.5971	60.1557	93.4199	74.3909	-1.54234	0.00136247	0.026561
LOC_Os03g58300	33214533	33217418	6.10683	13.8236	6.54116	8.82386	32.9005	26.8552	35.0325	31.5961	-1.83664	0.00218472	0.0385372
LOC_Os03g58400	33278922	33281166	41.8754	52.7024	20.5579	38.3786	8.85782	4.29684	14.5969	9.25051	2.044	0.00147848	0.028485
LOC_Os03g58890	33522519	33524525	125.626	202.17	219.596	182.464	474.526	350.192	272.475	365.731	-1.00219	0.00278775	0.0459124
LOC_Os03g59110	33649350	33653755	15.7033	15.5515	17.7546	16.3365	1.2654	1.07421	2.91937	1.75299	3.18588	0.00102362	0.0211822
LOC_Os03g59300	33765460	33767802	0	0	0	0	7.59241	54.7847	81.7424	48.0398	-8.20256	6.10271e-09	6.2012e-07
LOC_Os03g59320	33771756	33773624	77.644	99.357	88.7729	88.5913	29.1043	22.5584	23.355	25.0059	1.83055	3.02624e-06	0.00016025
LOC_Os03g59600	33936155	33937972	223.335	152.059	143.905	173.1	25.308	45.1168	55.4681	41.9643	2.03444	1.70364e-07	1.23516e-05
LOC_Os03g59650	33962373	33968064	216.356	256.6	170.07	214.342	31.6351	39.7458	51.5756	40.9855	2.37903	9.98005e-12	1.59185e-09
LOC_Os03g59774	34039023	34045065	204.143	177.115	128.954	170.07	72.1279	38.6715	88.5543	66.4513	1.35502	0.000449195	0.0110074
LOC_Os03g60419	34354523	34355095	274.807	114.908	53.2637	147.66	56.9431	15.0389	28.2206	33.4009	2.15286	0.000296253	0.00778899
LOC_Os03g60509	34394493	34395664	109.923	113.181	100.921	108.008	293.573	252.439	256.905	267.639	-1.30799	1.34793e-06	7.71189e-05
LOC_Os03g61030	34671286	34674494	109.051	94.1731	84.1006	95.7748	44.2891	26.8552	45.7368	38.9604	1.29879	0.000700546	0.0158529
LOC_Os03g61090	34707018	34707966	34.8962	31.103	28.0335	31.3443	113.886	61.2299	66.1725	80.4295	-1.3539	0.0012163	0.0242872
LOC_Os03g61670	34951952	34955910	289.638	565.039	300.893	385.19	155.644	136.425	189.759	160.609	1.26144	0.000253879	0.00685292
LOC_Os03g62830	35543736	35546969	19.1929	44.0627	28.0335	30.4297	2.5308	1.07421	3.8925	2.49917	3.59028	1.35045e-05	0.000588364
LOC_Os03g63074	35659820	35666982	179.715	65.662	64.4771	103.285	270.796	372.751	376.599	340.049	-1.71895	3.78556e-05	0.00138952
LOC_Os03g63300	35772622	35777460	78.5164	107.133	85.0351	90.2281	12.654	22.5584	36.9787	24.0637	1.88991	3.13969e-05	0.00118722
LOC_Os03g63580	35906755	35908400	31.4066	42.3347	54.1982	42.6465	258.142	189.061	177.109	208.104	-2.28703	6.4383e-11	9.2592e-09
LOC_Os04g05430	2726384	2736959	16.5757	46.6546	57.936	40.3887	0	7.51947	8.75812	5.42586	2.85493	0.000243324	0.00661205
LOC_Os04g06590	3465245	3470783	197.163	133.916	127.085	152.722	1305.9	2281.62	1475.26	1687.59	-3.46572	5.48082e-28	5.15158e-25
LOC_Os04g07590	4037451	4038926	28.7893	23.3273	20.5579	24.2249	0	0	0.973124	0.324375	5.94531	1.10828e-05	0.000500304
LOC_Os04g08510	4597987	4599183	6.97923	11.2317	3.73781	7.31623	0	0	0	0	5.18123	0.00237109	0.0410811
LOC_Os04g09390	5005077	5006210	0	0	0	0	103.763	1424.4	1221.27	916.479	-12.4512	1.24709e-10	1.72742e-08
LOC_Os04g10530	5727999	5731952	27.0445	104.541	42.0503	57.8785	0	6.44526	2.91937	3.12154	4.17301	2.02126e-07	1.44553e-05
LOC_Os04g10650	5785578	5788514	78.5164	193.53	194.366	155.471	44.2891	53.7105	54.495	50.8315	1.61025	0.000109315	0.00343543
LOC_Os04g11050	6004594	6009046	0	0	0	0	48.0853	35.4489	38.925	40.8197	-7.96051	9.75478e-10	1.15124e-07
LOC_Os04g11524	6306223	6309507	9.59645	18.1434	15.8857	14.5419	30.3697	40.82	72.9843	48.058	-1.73136	0.00146202	0.0282093
LOC_Os04g11640	6378760	6382313	7.85164	8.63974	6.54116	7.67751	0	0	0	0	5.24942	0.00148124	0.0285175
LOC_Os04g11730	6424807	6429290	30.5341	52.7024	37.3781	40.2049	6.32701	5.37105	11.6775	7.79185	2.35102	8.79591e-05	0.00288314
LOC_Os04g11990	6575927	6579373	0	0	0	0	13.9194	5.37105	2.91937	7.40328	-5.48758	0.00166187	0.0312855
LOC_Os04g12639	6996863	7005632	1105.34	2455.41	2506.2	2022.32	655.478	487.691	637.396	593.522	1.76872	2.13971e-07	1.52187e-05
LOC_Os04g13364	7426776	7439155	18.3205	18.1434	21.4924	19.3188	44.2891	103.124	55.4681	67.6271	-1.81081	0.000163122	0.00479135
LOC_Os04g16450	8948206	8950028	0.872404	6.04781	1.8689	2.92971	6.32701	42.9684	54.495	34.5968	-3.56123	8.80554e-05	0.00288314
LOC_Os04g16680	9075139	9077888	6.97923	19.8714	11.2134	12.688	179.687	93.4562	95.3662	122.837	-3.26998	3.12823e-11	4.67777e-09
LOC_Os04g19100	10606584	10609399	0	4.31987	3.73781	2.68589	12.654	41.8942	23.355	25.9677	-3.28175	0.000217247	0.00599947
LOC_Os04g19114	10611099	10617668	72.4096	27.6472	22.4268	40.8278	186.014	460.836	182.947	276.599	-2.75891	4.02807e-08	3.4197e-06
LOC_Os04g20164	11236464	11244053	13.0861	9.50371	4.67226	9.08734	6.32701	80.5657	60.3337	49.0755	-2.43437	0.00151037	0.028909
LOC_Os04g20540	11472093	11473569	15.7033	38.8788	43.9192	32.8338	0	0	0	0	7.34444	6.30379e-08	5.07349e-06
LOC_Os04g21870	12387748	12389243	2.61721	25.0552	6.54116	11.4045	0	0	0.973124	0.324375	4.85954	0.00273331	0.0453764
LOC_Os04g22235	12593735	12594095	238.166	646.252	487.784	457.401	10.1232	1.07421	5.83875	5.67872	6.36812	1.55809e-29	1.51873e-26
LOC_Os04g24110	13771321	13773274	29.6617	31.967	14.0168	25.2152	0	0	0	0	6.96584	4.35294e-07	2.89295e-05
LOC_Os04g26920	15924282	15928162	1296.39	1646.73	1720.32	1554.48	191.076	475.875	537.165	401.372	1.95177	1.02865e-07	7.77928e-06
LOC_Os04g27060	16001490	16005331	0.872404	23.3273	3.73781	9.3125	0	0	0	0	5.52911	0.00237105	0.0410811
LOC_Os04g27800	16426989	16428906	18.3205	17.2795	27.0991	20.8997	161.972	274.998	191.705	209.558	-3.33032	4.87809e-18	1.9751e-15
LOC_Os04g27810	16432046	16432507	71.5371	38.0148	38.3125	49.2882	606.128	962.492	551.761	706.794	-3.84089	2.20534e-26	1.81376e-23
LOC_Os04g28120	16602471	16605138	359.431	2755.21	2235.21	1783.28	321.412	106.347	152.781	193.513	3.20467	0.000280583	0.00748273
LOC_Os04g28260	16698985	16707481	32.279	139.964	60.7393	77.6607	16.4502	20.41	27.2475	21.3692	1.85586	0.00103885	0.0213932
LOC_Os04g28420	16813848	16817974	717.116	1388.41	744.758	950.093	2022.11	4854.35	3716.36	3530.94	-1.89394	4.66558e-07	3.09292e-05
LOC_Os04g28820	17063617	17070532	9.59645	12.9596	16.8201	13.1254	10.1232	133.202	138.184	93.8363	-2.84278	5.87314e-05	0.00202581
LOC_Os04g30280	18078124	18084056	2.61721	11.2317	8.41006	7.41964	0	0	0	0	5.19929	0.00255083	0.0430627
LOC_Os04g30720	18361189	18366200	59.3235	220.313	117.741	132.459	48.0853	48.3394	44.7637	47.0628	1.49374	0.00149198	0.0286612
LOC_Os04g31040	18551238	18553801	13.9585	34.5589	12.1479	20.2218	5.06161	1.07421	3.8925	3.34277	2.61421	0.00290739	0.0473494
LOC_Os04g31250	18695867	18696438	41.003	40.6068	62.6082	48.0727	1.2654	0	0.973124	0.746176	6.04181	1.24974e-07	9.31746e-06
LOC_Os04g32070	19233125	19235217	137.84	198.714	128.954	155.169	334.066	371.677	389.25	364.997	-1.23391	1.83649e-05	0.000755201
LOC_Os04g32320	19373689	19376928	17.4481	5.18384	5.60671	9.41288	82.2512	163.28	170.297	138.609	-3.87809	2.20189e-13	4.63595e-11
LOC_Os04g32430	19442954	19444414	76.7716	65.662	60.7393	67.7243	217.649	209.471	183.92	203.68	-1.58702	9.83841e-08	7.50514e-06
LOC_Os04g32890	19865447	19867384	3.48962	24.1913	11.2134	12.9648	35.4313	77.3431	69.0918	60.6221	-2.22623	0.000354114	0.00911896
LOC_Os04g33115	20047507	20048091	2.61721	1.72795	0	1.44839	30.3697	10.7421	5.83875	15.6502	-3.40429	0.00233729	0.040608
LOC_Os04g33150	20065193	20066677	13852.9	8152.45	11454.5	11153.3	39904.5	21738.8	19021.7	26888.3	-1.26949	0.000187535	0.00533574
LOC_Os04g33220	20099031	20103020	846.232	555.535	500.866	634.211	341.659	267.478	319.185	309.441	1.03585	0.000450186	0.0110111
LOC_Os04g33990	20579349	20580533	191.057	85.5334	68.2149	114.935	250.55	270.701	260.797	260.683	-1.18076	0.00280317	0.0461375
LOC_Os04g34000	20587018	20593240	374.261	361.141	286.877	340.76	763.038	1049.5	818.398	876.979	-1.3637	2.07741e-07	1.48166e-05
LOC_Os04g34170	20708033	20709831	4.36202	2.59192	3.73781	3.56392	43.0237	293.259	377.572	237.952	-6.06426	3.23759e-17	1.15145e-14
LOC_Os04g34510	20892244	20892859	232.06	134.78	171.005	179.281	663.071	299.704	307.507	423.428	-1.23838	0.00116018	0.0233616
LOC_Os04g34580	20924201	20925292	12.2137	24.1913	28.0335	21.4795	141.725	75.1947	58.3875	91.7691	-2.09255	2.24532e-05	0.000888607
LOC_Os04g35270	21447896	21449455	343.727	697.227	407.421	482.792	54.4123	34.3747	54.495	47.7607	3.3387	1.81852e-19	8.39644e-17
LOC_Os04g35420	21547034	21558315	232.932	310.167	252.302	265.133	24.0426	76.2689	90.5006	63.604	2.05083	1.43151e-06	8.15462e-05
LOC_Os04g35490	21595744	21597815	71.5371	158.971	63.5427	98.017	215.118	340.524	274.421	276.688	-1.49667	0.000169435	0.00493272
LOC_Os04g35840	21842286	21848136	269.573	504.561	477.505	417.213	844.023	1118.25	832.994	931.757	-1.15934	0.000187106	0.00532927
LOC_Os04g36070	22023832	22027680	9.59645	23.3273	24.2957	19.0732	62.0047	62.3042	54.495	59.6013	-1.64503	0.000593302	0.013709
LOC_Os04g36750	22200999	22201941	34.0238	31.103	5.60671	23.5778	59.4739	90.2336	76.8768	75.5281	-1.67655	0.00264372	0.0443168
LOC_Os04g36770	22205218	22205925	1035.54	557.263	441.995	678.267	70.8625	16.1131	29.1937	38.7231	4.14327	7.89998e-18	3.10316e-15
LOC_Os04g37430	22305064	22309320	140.457	178.843	141.102	153.467	74.6587	46.191	65.1993	62.0164	1.31035	0.00010621	0.0033516
LOC_Os04g37680	22411902	22412993	87.2404	50.9744	66.346	68.187	303.697	117.089	114.829	178.538	-1.38537	0.00179063	0.0329781
LOC_Os04g37770	22452022	22452695	177.97	119.228	42.9848	113.395	22.7772	18.2616	16.5431	19.194	2.56898	1.28148e-06	7.41825e-05
LOC_Os04g38026	22627207	22633284	165.757	203.034	147.643	172.145	40.4929	20.41	23.355	28.0859	2.62998	7.03519e-12	1.1572e-09
LOC_Os04g38220	22744184	22748089	97.7093	142.556	112.134	117.466	69.5971	38.6715	56.4412	54.9033	1.10143	0.00292573	0.0476186
LOC_Os04g38400	22834019	22835356	13.9585	24.1913	24.2957	20.8152	73.3933	49.4136	56.4412	59.7494	-1.51969	0.00081907	0.017806
LOC_Os04g38570	22914742	22921316	0	5.18384	0.934451	2.03943	1.2654	39.7458	32.1131	24.3748	-3.5752	0.00212431	0.0377591
LOC_Os04g39030	23178662	23182857	7.85164	11.2317	4.67226	7.91852	43.0237	29.0037	25.3012	32.4429	-2.02357	0.000952859	0.020094
LOC_Os04g39100	23235806	23237196	1670.65	1239.8	886.794	1265.75	744.057	341.599	326.97	470.875	1.42804	0.000155657	0.00461542
LOC_Os04g39540	23543942	23546897	95.9645	52.7024	45.7881	64.8183	187.28	134.276	131.372	150.976	-1.2169	0.00153923	0.0292698
LOC_Os04g40290	23955470	23959975	33.1514	47.5185	31.7713	37.4804	8.85782	9.66789	5.83875	8.12148	2.21635	0.000146148	0.00438077
LOC_Os04g40380	24004990	24005628	63.6855	72.5738	42.0503	59.4365	16.4502	7.51947	0.973124	8.31427	2.88242	1.25324e-05	0.00055155
LOC_Os04g40500	24060045	24063819	6.10683	19.0074	17.7546	14.2896	45.5545	46.191	53.5218	48.4224	-1.76373	0.000890536	0.0190546
LOC_Os04g40510	24064718	24068529	80.2612	113.181	48.5915	80.6777	783.284	538.179	643.235	654.899	-3.01883	2.06845e-18	8.64088e-16
LOC_Os04g40940	24301441	24303182	70.6647	113.181	58.8704	80.9052	27.8389	24.7068	18.4894	23.6783	1.78065	6.63021e-05	0.00225153
LOC_Os04g40980	24321375	24325746	268.701	113.181	183.152	188.344	685.848	609.077	528.406	607.777	-1.68986	7.05284e-07	4.50526e-05
LOC_Os04g41250	24471709	24479505	27.9169	16.4155	19.6235	21.3186	87.3128	64.4526	74.9306	75.5653	-1.82349	1.69865e-05	0.000710471
LOC_Os04g41350	24534461	24536254	54.9615	116.636	66.346	79.3146	45.5545	19.3358	20.4356	28.442	1.4928	0.00257651	0.0433837
LOC_Os04g41900	24830257	24831375	128.243	311.03	117.741	185.672	65.8009	22.5584	42.8175	43.7256	2.09253	1.8892e-05	0.000773252
LOC_Os04g42230	24977207	24977857	11.3413	33.695	11.2134	18.7499	3.79621	0	1.94625	1.91415	3.33705	0.00132494	0.0261197
LOC_Os04g42260	25001492	25006621	76.7716	114.045	62.6082	84.4748	22.7772	18.2616	26.2744	22.4377	1.91142	1.21083e-05	0.000537361
LOC_Os04g42770	25314271	25320584	349.834	618.605	555.999	508.146	1138.86	1416.88	1245.6	1267.11	-1.31841	4.4451e-06	0.000228043
LOC_Os04g43160	25548378	25550603	213.739	292.887	230.809	245.812	2249.89	1182.7	1033.46	1488.68	-2.59778	2.46936e-14	5.90806e-12
LOC_Os04g43200	25563393	25565204	129.988	304.119	237.351	223.819	1095.84	1045.21	880.677	1007.24	-2.16984	6.05227e-11	8.80019e-09
LOC_Os04g43290	25608130	25611089	29.6617	7.77576	27.0991	21.5122	96.1706	84.8626	39.8981	73.6437	-1.77415	0.00132769	0.0261411
LOC_Os04g43390	25658227	25666730	20.9377	13.8236	10.279	15.0134	89.8436	100.976	88.5543	93.1245	-2.62919	9.83919e-10	1.15602e-07
LOC_Os04g43710	25867807	25869189	52.3443	21.5993	12.1479	28.6972	161.972	196.58	182.947	180.5	-2.65011	1.39617e-08	1.33616e-06
LOC_Os04g44280	26227217	26228435	13.0861	9.50371	14.9512	12.5137	0	0	0.973124	0.324375	4.99089	0.000701198	0.0158541
LOC_Os04g44500	26342443	26343781	26.1721	50.1105	21.4924	32.5917	132.867	76.2689	71.0381	93.3914	-1.51273	0.00103037	0.0212907
LOC_Os04g44580	26381989	26385985	589.745	1149.08	983.043	907.291	422.644	272.849	253.012	316.169	1.52241	5.80298e-06	0.000286534
LOC_Os04g44640	26412806	26423826	29.6617	65.662	21.4924	38.9387	2.5308	4.29684	6.81187	4.5465	3.07172	2.35707e-05	0.00092587
LOC_Os04g44790	26522976	26523540	69.7923	54.4303	55.1326	59.7851	282.185	143.944	92.4468	172.859	-1.52788	0.000387662	0.00976096
LOC_Os04g44820	26532535	26535961	112.54	187.482	170.07	156.698	525.142	375.973	277.34	392.819	-1.3246	9.57926e-05	0.00307823
LOC_Os04g44870	26558810	26561326	247.763	234.137	191.563	224.487	599.801	531.734	406.766	512.767	-1.19038	1.67593e-05	0.000705713
LOC_Os04g44910	26576092	26578766	74.1544	107.133	84.1006	88.4626	37.9621	41.8942	30.1669	36.6744	1.27343	0.000869586	0.0187153
LOC_Os04g45834	27137046	27144292	77.644	44.9266	50.4604	57.677	177.156	148.241	175.162	166.853	-1.53173	7.62154e-06	0.000364036
LOC_Os04g45890	27172115	27173657	0	0	0.934451	0.311484	8.85782	18.2616	4.86562	10.6617	-5.06246	0.00119286	0.0238734
LOC_Os04g46440	27539878	27540929	302.724	289.431	230.809	274.322	799.734	501.656	485.589	595.66	-1.11728	0.000186152	0.00530786
LOC_Os04g46740	27706654	27708850	4.36202	6.04781	0	3.46995	29.1043	178.319	395.088	200.837	-5.84928	2.5951e-05	0.00100586
LOC_Os04g47330	28096279	28097630	33.1514	3.45589	2.80335	13.1369	107.559	110.644	80.7693	99.6574	-2.91874	2.6645e-05	0.00102973
LOC_Os04g47450	28156070	28157125	13.9585	9.50371	9.34451	10.9356	0	0	0	0	5.75958	0.00017676	0.00510343
LOC_Os04g47580	28218714	28221677	29.6617	119.228	54.1982	67.6961	17.7156	11.8163	19.4625	16.3315	2.05156	0.000388317	0.00976096
LOC_Os04g47720	28315067	28316878	27.9169	57.0223	63.5427	49.494	12.654	16.1131	14.5969	14.4547	1.77135	0.000795947	0.0174564
LOC_Os04g48060	28597313	28600302	207.632	237.593	199.038	214.754	126.54	94.5304	93.4199	104.83	1.03834	0.000432415	0.0106931
LOC_Os04g49180	29325884	29326228	22.6825	17.2795	14.0168	17.9929	101.232	47.2652	32.1131	60.2035	-1.73359	0.00136082	0.0265486
LOC_Os04g49320	29437897	29441912	0.872404	5.18384	0.934451	2.33023	22.7772	24.7068	23.355	23.613	-3.32739	9.16545e-05	0.00297431
LOC_Os04g49440	29499367	29501790	13.9585	8.63974	5.60671	9.40164	37.9621	27.9294	36.0056	33.9657	-1.84759	0.00151397	0.0289568
LOC_Os04g49550	29551989	29553107	95.9645	61.3421	52.3293	69.8786	323.943	152.538	101.205	192.562	-1.45868	0.00133446	0.0262033
LOC_Os04g49670	29619361	29621500	19.1929	57.0223	35.5091	37.2414	253.08	110.644	66.1725	143.299	-1.9402	0.000291615	0.00771329
LOC_Os04g49680	29624153	29625132	430.968	442.354	397.142	423.488	1628.57	642.377	589.713	953.554	-1.17013	0.00241794	0.0416462
LOC_Os04g49720	29654078	29654740	34271.5	17418.6	18722.7	23470.9	2076.53	609.077	1196.94	1294.18	4.18112	2.33306e-23	1.42794e-20
LOC_Os04g49730	29656092	29656652	3592.56	2286.07	2083.83	2654.15	811.123	370.602	497.267	559.664	2.24659	1.12851e-10	1.5798e-08
LOC_Os04g49860	29719544	29729743	77.644	134.78	91.5762	101.333	25.308	45.1168	52.5487	40.9912	1.2974	0.00191674	0.0348615
LOC_Os04g49980	29811954	29812728	590.618	852.742	471.898	638.419	2324.54	2064.63	1752.6	2047.26	-1.68073	7.63373e-09	7.5813e-07
LOC_Os04g50120	29894656	29896857	41.003	31.103	52.3293	41.4784	155.644	111.718	72.9843	113.449	-1.44936	0.000440195	0.0108069
LOC_Os04g50216	29975239	29977835	601.087	254.008	304.631	386.575	976.891	789.544	838.833	868.423	-1.16733	0.000775099	0.0171277
LOC_Os04g50970	30172119	30174209	2400.86	2330.14	2382.85	2371.28	8499.71	5191.65	3704.68	5798.68	-1.28992	5.16266e-05	0.001802
LOC_Os04g51110	30267833	30270709	734.564	667.852	566.277	656.231	173.36	329.782	387.303	296.815	1.1425	0.00055821	0.0131169
LOC_Os04g51130	30282336	30284610	27.9169	16.4155	15.8857	20.0727	112.621	171.874	109.963	131.486	-2.71006	6.24459e-11	9.02996e-09
LOC_Os04g51680	30615960	30616175	420.499	265.24	200.907	295.549	1613.39	835.735	588.74	1012.62	-1.77574	1.16805e-05	0.000520147
LOC_Os04g51796	30697527	30701645	37.5134	53.5664	42.9848	44.6882	60.7393	172.948	150.834	128.174	-1.52315	0.000513384	0.0122607
LOC_Os04g52700	31379265	31380794	131.733	89.8533	95.314	105.633	49.3507	23.6326	33.0862	35.3565	1.58763	9.65461e-05	0.00309866
LOC_Os04g52750	31410505	31410993	0.872404	0	0	0.290801	34.1659	259.959	230.63	174.918	-9.10186	6.82636e-12	1.12991e-09
LOC_Os04g52890	31497254	31502769	534.784	608.237	600.852	581.291	1803.2	1436.22	1291.34	1510.25	-1.37711	2.21531e-08	2.01739e-06
LOC_Os04g53540	31899718	31907122	148.309	452.722	305.566	302.199	83.5166	96.6789	120.667	100.288	1.58938	9.72903e-05	0.00311116
LOC_Os04g53720	32009476	32016407	94.2197	160.699	66.346	107.088	31.6351	24.7068	27.2475	27.8631	1.94637	1.15836e-05	0.000517586
LOC_Os04g53760	32033885	32039122	43.6202	158.107	70.0838	90.6037	18.981	15.0389	30.1669	21.3956	2.07677	0.000143164	0.00430112
LOC_Os04g54210	32295071	32295355	56.7063	36.2869	19.6235	37.5389	370.763	153.612	146.942	223.772	-2.57122	7.7742e-08	6.1075e-06
LOC_Os04g54220	32296089	32296600	12.2137	53.5664	60.7393	42.1731	327.739	171.874	109.963	203.192	-2.26785	2.98715e-05	0.00113279
LOC_Os04g54230	32297556	32298132	12.2137	19.8714	7.47561	13.1869	355.578	228.807	116.775	233.72	-4.1401	6.97239e-17	2.38311e-14
LOC_Os04g54240	32301622	32302456	37.5134	114.045	57.0015	69.5198	393.54	316.892	141.103	283.845	-2.02754	1.62441e-05	0.000688426
LOC_Os04g54280	32319644	32323748	20.9377	48.3825	40.1814	36.5005	445.422	286.814	205.329	312.522	-3.0967	4.5408e-14	1.03917e-11
LOC_Os04g54300	32333335	32333993	41.8754	83.8054	28.968	51.5496	250.55	328.708	187.813	255.69	-2.30775	3.96052e-08	3.38425e-06
LOC_Os04g54310	32336347	32337872	2.61721	16.4155	12.1479	10.3935	101.232	45.1168	18.4894	54.9461	-2.39705	0.0008511	0.0183751
LOC_Os04g54590	32459573	32460498	29.6617	22.4633	27.0991	26.408	65.8009	64.4526	68.1187	66.1241	-1.3249	0.000885992	0.0189882
LOC_Os04g55650	33123071	33126988	603.704	472.594	473.767	516.688	277.123	222.361	194.625	231.37	1.16119	2.20647e-05	0.000878514
LOC_Os04g55710	33161540	33164790	916.024	501.969	451.34	623.111	3787.35	2261.21	1700.05	2582.87	-2.05107	3.9609e-08	3.38425e-06
LOC_Os04g55970	33341978	33346562	0	5.18384	0.934451	2.03943	10.1232	34.3747	73.9574	39.4851	-4.26864	1.04943e-05	0.000479497
LOC_Os04g56180	33499949	33506116	0	0	0	0	3.79621	17.1874	66.1725	29.052	-7.47901	7.90976e-07	5.00519e-05
LOC_Os04g56240	33530075	33533747	0.872404	0.863974	0.934451	0.890276	2.5308	26.8552	14.5969	14.661	-4.05023	0.00124607	0.0248252
LOC_Os04g57220	34087746	34090681	4228.54	3163.87	3310.76	3567.73	10558.5	7435.68	6443.06	8145.75	-1.19095	1.64448e-05	0.000694693
LOC_Os04g57530	34231186	34233373	2.61721	14.6876	0.934451	6.07974	68.3317	16.1131	27.2475	37.2308	-2.6006	0.00229928	0.0400908
LOC_Os04g57630	34298775	34302683	47.9822	79.4856	74.7561	67.408	25.308	12.8905	30.1669	22.7885	1.56276	0.00096475	0.0202636
LOC_Os04g57650	34321350	34324747	92.4748	48.3825	33.6402	58.1659	197.403	197.655	228.684	207.914	-1.83643	3.1727e-06	0.000167333
LOC_Os04g57760	34400035	34401645	292.255	284.247	216.793	264.432	732.668	572.554	453.476	586.233	-1.14725	7.35543e-05	0.00246599
LOC_Os04g58280	34694304	34697202	561.828	704.138	414.896	560.288	1632.37	918.449	846.618	1132.48	-1.01448	0.00253186	0.0428787
LOC_Os04g58390	34737984	34742719	1703.81	793.128	744.758	1080.56	2352.38	3098.02	2952.46	2800.95	-1.37412	7.62516e-05	0.00253703
LOC_Os04g58710	34908441	34910661	2525.61	2353.46	2914.55	2597.88	9627.18	4869.39	3374.8	5957.12	-1.19716	0.00102378	0.0211822
LOC_Os04g58780	34958612	34970112	135.223	168.475	103.724	135.807	50.6161	48.3394	75.9037	58.2864	1.2165	0.000878882	0.0188666
LOC_Os04g59150	35187373	35189338	115.157	171.931	46.7226	111.27	30.3697	21.4842	27.2475	26.3671	2.08062	3.19807e-05	0.00120756
LOC_Os05g01210	149946	152046	625.514	481.233	515.817	540.855	1380.55	1156.92	1047.08	1194.85	-1.1431	5.06174e-06	0.000252779
LOC_Os05g01330	207853	209693	11.3413	1.72795	8.41006	7.15975	222.711	238.475	233.55	231.578	-5.02106	1.74621e-27	1.53189e-24
LOC_Os05g01380	230784	231999	16.5757	38.0148	6.54116	20.3772	0	1.07421	0	0.35807	5.69734	9.4706e-05	0.0030545
LOC_Os05g01470	267816	278060	80.2612	105.405	101.855	95.8404	137.929	282.517	228.684	216.377	-1.17694	0.000757247	0.0168892
LOC_Os05g01810	486053	488406	5.23443	12.9596	3.73781	7.31061	135.398	51.5621	63.2531	83.4044	-3.50034	4.87616e-09	5.07236e-07
LOC_Os05g02070	605760	606871	142.202	116.636	120.544	126.461	857.943	1900.28	2670.25	1809.49	-3.83913	8.82945e-24	5.66765e-21
LOC_Os05g02250	716295	718898	1258.88	1745.23	1817.51	1607.2	5524.75	3173.21	2554.45	3750.8	-1.22247	0.000215034	0.00595086
LOC_Os05g02300	738204	739079	157.033	132.188	71.0183	120.08	69.5971	10.7421	24.3281	34.8891	1.79589	0.00170379	0.0318922
LOC_Os05g02310	739646	742966	48.8546	40.6068	20.5579	36.6731	80.9858	127.831	130.399	113.072	-1.62417	0.000123275	0.00376376
LOC_Os05g02610	909668	910526	154.416	49.2465	33.6402	79.1008	26.5734	18.2616	2.91937	15.9181	2.33021	0.000969867	0.0203386
LOC_Os05g02620	912965	913746	68.0475	71.7098	55.1326	64.9633	2.5308	0	0	0.843602	6.46139	6.69677e-09	6.72693e-07
LOC_Os05g03120	1240299	1245353	12.2137	71.7098	30.8369	38.2535	151.848	110.644	125.533	129.342	-1.75563	0.00080274	0.0175761
LOC_Os05g04120	1846097	1848754	63.6855	30.2391	19.6235	37.8494	3.79621	1.07421	3.8925	2.92097	3.70126	4.55989e-06	0.000232469
LOC_Os05g05480	2725695	2733753	142.202	297.207	162.595	200.668	73.3933	47.2652	73.9574	64.872	1.63016	2.87205e-05	0.00109705
LOC_Os05g05580	2767332	2775704	88.1128	91.5812	69.1494	82.9478	8.85782	18.2616	33.0862	20.0685	2.02689	3.2479e-05	0.00122462
LOC_Os05g06460	3313391	3319717	1370.55	1368.53	1023.22	1254.1	478.322	462.984	696.757	546.021	1.1989	1.59454e-05	0.000679048
LOC_Os05g07680	4129180	4134223	55.8339	127.004	72.8872	85.2417	29.1043	22.5584	34.0594	28.574	1.57569	0.000521291	0.0124209
LOC_Os05g07850	4230147	4239980	965.751	1848.9	1578.29	1464.31	718.749	552.144	592.633	621.175	1.23754	4.13818e-05	0.0014919
LOC_Os05g08770	4812048	4815430	446.671	454.45	324.255	408.459	115.152	122.46	158.619	132.077	1.62657	2.56335e-08	2.30246e-06
LOC_Os05g09060	5030749	5032408	146.564	148.603	118.675	137.948	0	0	0	0	9.41646	2.31642e-14	5.69752e-12
LOC_Os05g09500	5337195	5341210	272.19	614.285	649.444	511.973	218.915	168.651	147.915	178.493	1.52169	3.43236e-05	0.0012795
LOC_Os05g10620	5784141	5789560	45.365	43.1987	21.4924	36.6854	5.06161	3.22263	7.78499	5.35641	2.76477	3.82573e-05	0.00139841
LOC_Os05g10940	6090801	6094142	65.4303	95.0371	33.6402	64.7026	18.981	9.66789	8.75812	12.469	2.39554	2.15547e-05	0.000863926
LOC_Os05g11120	6255252	6257922	67.1751	50.9744	29.9024	49.3507	11.3886	15.0389	21.4087	15.9454	1.61964	0.00222469	0.0390329
LOC_Os05g11980	6843465	6852938	129.116	256.6	243.892	209.869	49.3507	76.2689	96.3393	73.9863	1.49867	0.000115501	0.00358883
LOC_Os05g12580	7219557	7219895	324.534	135.644	100.921	187.033	72.1279	59.0815	51.5756	60.9283	1.62117	0.000340098	0.00883583
LOC_Os05g12670	7271691	7272578	179.715	90.7172	93.4451	121.293	1109.76	326.56	332.809	589.709	-2.28017	2.09455e-06	0.000114604
LOC_Os05g14590	8312907	8319399	270.445	446.674	358.829	358.65	56.9431	105.273	116.775	92.9969	1.94196	3.97345e-08	3.38425e-06
LOC_Os05g15480	8755038	8756090	0	2.59192	1.8689	1.48694	13.9194	47.2652	9.73124	23.6386	-3.99424	0.000131316	0.00398614
LOC_Os05g15490	8761663	8762319	17.4481	6.91179	8.41006	10.9233	125.275	96.6789	35.0325	85.6621	-2.96551	3.34781e-07	2.27082e-05
LOC_Os05g18604	10757560	10790758	1819.84	2272.25	2198.76	2096.95	5968.9	4690	5067.06	5241.99	-1.32177	1.81871e-08	1.70337e-06
LOC_Os05g19000	11025510	11027958	182.332	210.81	86.904	160.015	30.3697	7.51947	14.5969	17.4953	3.21323	4.53834e-10	5.71484e-08
LOC_Os05g23130	13187131	13188292	203.27	211.674	183.152	199.365	856.677	457.613	382.438	565.576	-1.50282	1.21283e-05	0.000537361
LOC_Os05g25000	14467864	14469140	47.9822	50.1105	77.5595	58.5507	244.223	151.464	166.404	187.363	-1.67786	2.78214e-06	0.000148822
LOC_Os05g25490	14821904	14824477	0	0.863974	1.8689	0.910959	8.85782	67.6752	169.324	81.9522	-6.51969	8.13884e-09	7.99246e-07
LOC_Os05g25630	14897403	14897890	673.496	1816.94	1038.18	1176.2	161.972	67.6752	92.4468	107.365	3.45741	1.11556e-16	3.6246e-14
LOC_Os05g26240	15266310	15266929	3574.24	2283.48	4381.64	3413.12	1105.96	228.807	186.84	507.203	2.751	0.000941104	0.019942
LOC_Os05g26350	15330469	15331142	84436.5	112127	150723	115762	22366	11131	8376.65	13957.9	3.05207	6.43422e-16	1.92427e-13
LOC_Os05g26368	15333031	15333661	187.567	139.964	219.596	182.376	77.1895	29.0037	15.57	40.5877	2.18227	1.22138e-05	0.000540239
LOC_Os05g26440	15372629	15373075	124.754	140.828	182.218	149.266	25.308	5.37105	6.81187	12.497	3.6183	2.28726e-12	4.09498e-10
LOC_Os05g26460	15384835	15385500	13054.7	72285.2	96481.2	60607	13593	7241.25	6078.13	8970.78	2.75621	2.33322e-07	1.63668e-05
LOC_Os05g26480	15398528	15399097	8972.68	7114.82	2832.32	6306.61	2365.04	988.273	539.111	1297.47	2.28162	4.86737e-06	0.000245401
LOC_Os05g26490	15401029	15401612	16473.6	23943.3	26054.4	22157.1	8432.64	3685.61	2471.74	4863.33	2.1879	8.79829e-08	6.75083e-06
LOC_Os05g26500	15403946	15408408	23.5549	25.9192	48.5915	32.6885	0	1.07421	0.973124	0.682445	5.50028	4.34373e-06	0.000223278
LOC_Os05g26620	15464454	15465082	14828.3	19369.4	24827.4	19675	284.716	187.987	94.3931	189.032	6.70514	1.53224e-70	2.01627e-66
LOC_Os05g26690	15502493	15502954	1124.53	3432.57	5038.56	3198.55	392.275	165.428	116.775	224.826	3.83266	6.01478e-14	1.33023e-11
LOC_Os05g26720	15512513	15513163	79025.9	89654.5	130808	99829.5	27145.4	13798.2	10349.2	17097.6	2.54571	6.29935e-12	1.04928e-09
LOC_Os05g26750	15524253	15524996	13219.5	20002.7	29439.9	20887.4	9269.07	2628.59	2724.75	4874.14	2.09954	6.86994e-06	0.000332408
LOC_Os05g26770	15530219	15530862	54132.7	77672.1	105062	78955.7	8303.57	3639.42	2927.16	4956.72	3.99373	1.8285e-23	1.14577e-20
LOC_Os05g26940	15643309	15644664	2.61721	11.2317	14.0168	9.28855	0	0	0	0	5.52212	0.000876846	0.0188536
LOC_Os05g27060	15732702	15738408	0.872404	38.0148	2.80335	13.8969	0	0	0	0	6.10652	0.000606256	0.0139227
LOC_Os05g27500	15994580	15998427	152.671	362.869	185.956	233.832	0	1.07421	0	0.35807	9.21596	1.73804e-13	3.74932e-11
LOC_Os05g27580	16047150	16050791	9.59645	48.3825	4.67226	20.8837	741.526	153.612	132.345	342.494	-4.03386	0.000572449	0.0133443
LOC_Os05g27820	16216524	16220140	268.701	181.434	171.939	207.358	116.417	63.3784	99.2587	93.018	1.15905	0.000994358	0.0207365
LOC_Os05g28210	16518574	16519496	469.353	925.316	523.293	639.321	2415.65	1940.02	1893.7	2083.13	-1.70385	5.46535e-08	4.46699e-06
LOC_Os05g29010	17006496	17011733	314.938	232.409	205.579	250.975	37.9621	74.1205	70.0649	60.7158	2.04082	1.12361e-08	1.08717e-06
LOC_Os05g29810	17246963	17248264	237.294	279.927	266.319	261.18	812.388	558.589	577.063	649.347	-1.31312	1.13385e-06	6.66085e-05
LOC_Os05g29974	17336715	17344202	40.1306	174.523	118.675	111.11	40.4929	36.5231	30.1669	35.7276	1.63967	0.00131045	0.0258922
LOC_Os05g30580	17720680	17723135	18.3205	46.6546	71.0183	45.3311	0	0	0.973124	0.324375	6.84757	3.21363e-07	2.19679e-05
LOC_Os05g31220	18158247	18161024	31.4066	21.5993	57.936	36.9806	0	0	0.973124	0.324375	6.55338	9.3998e-07	5.68699e-05
LOC_Os05g31550	18354322	18357990	0	0.863974	0.934451	0.599475	16.4502	7.51947	13.6237	12.5311	-4.39462	0.00110081	0.0224122
LOC_Os05g31610	18396847	18401175	28.7893	31.103	27.0991	28.9972	120.213	162.206	135.264	139.228	-2.26372	1.0629e-10	1.4959e-08
LOC_Os05g31670	18429324	18430293	66.3027	88.1253	30.8369	61.755	207.526	245.994	226.738	226.753	-1.87445	1.3326e-06	7.6575e-05
LOC_Os05g31910	18575666	18578864	11.3413	32.831	48.5915	30.9212	174.626	79.4915	66.1725	106.763	-1.78666	0.00109257	0.0223074
LOC_Os05g32220	18789636	18793774	192.801	176.251	177.546	182.199	60.7393	47.2652	95.3662	67.7902	1.42176	4.70991e-05	0.00166831
LOC_Os05g32450	18943690	18946757	81.1336	19.8714	32.7058	44.5703	111.355	152.538	147.915	137.269	-1.62307	0.000767186	0.017053
LOC_Os05g33900	19997533	19999567	5.23443	72.5738	10.279	29.3624	208.791	113.866	131.372	151.343	-2.36253	0.000610079	0.0139861
LOC_Os05g34040	20102713	20112210	98.5817	107.997	87.8384	98.1389	20.2464	37.5973	52.5487	36.7975	1.40332	0.000767881	0.0170541
LOC_Os05g34150	20192361	20193786	17.4481	19.8714	11.2134	16.1776	48.0853	56.9331	59.3606	54.793	-1.75843	0.00015341	0.00455693
LOC_Os05g34170	20204127	20207554	491.164	819.047	384.994	565.068	311.289	123.534	136.237	190.353	1.57291	0.000150742	0.0045082
LOC_Os05g34270	20283253	20287008	20.0653	50.1105	28.968	33.0479	3.79621	6.44526	9.73124	6.65757	2.28935	0.000670799	0.0152453
LOC_Os05g34290	20302077	20304710	60.1959	75.1657	51.3948	62.2521	165.768	135.35	128.452	143.19	-1.19875	0.000281733	0.00749711
LOC_Os05g34700	20586241	20590951	0	0	0.934451	0.311484	1.2654	44.0426	48.6562	31.3214	-6.62394	1.22901e-05	0.000542701
LOC_Os05g35400	21033769	21036041	75.0268	122.684	103.724	100.478	24.0426	44.0426	24.3281	30.8044	1.7036	5.08436e-05	0.0017817
LOC_Os05g35690	21198101	21198992	2219.4	298.071	352.288	956.585	11060.9	7175.72	5444.63	7893.74	-3.04471	0.00231722	0.0403338
LOC_Os05g36280	21499419	21500179	308.831	406.068	206.514	307.137	160.706	83.7883	101.205	115.233	1.41832	0.000116225	0.00359859
LOC_Os05g37470	21926799	21932073	211.994	214.265	129.889	185.383	802.265	549.995	487.535	613.265	-1.72447	7.91021e-08	6.19586e-06
LOC_Os05g38570	22625126	22629028	33.1514	31.103	40.1814	34.8119	6.32701	6.44526	7.78499	6.85242	2.33798	8.829e-05	0.00288314
LOC_Os05g38600	22638494	22639018	54.0891	146.012	121.479	107.193	1151.52	311.521	244.254	569.097	-2.40753	7.53414e-06	0.000361831
LOC_Os05g38660	22665339	22666007	36.641	68.2539	53.2637	52.7195	3.79621	3.22263	7.78499	4.93461	3.39182	7.03232e-08	5.60838e-06
LOC_Os05g38740	22736688	22737282	156.16	139.964	81.2973	125.807	48.0853	21.4842	17.5162	29.0286	2.13223	4.9585e-06	0.000248567
LOC_Os05g39050	22903108	22903946	766.843	558.127	342.944	555.971	278.389	131.054	118.721	176.054	1.66243	4.09647e-05	0.0014804
LOC_Os05g39230	22996896	23005544	139.585	48.3825	43.9192	77.2955	134.133	599.409	587.767	440.436	-2.51067	4.5667e-06	0.000232469
LOC_Os05g39850	23419593	23424596	203.27	368.053	229.875	267.066	80.9858	87.011	115.802	94.5995	1.4947	1.35254e-05	0.000588364
LOC_Os05g39930	23463230	23465862	21.8101	27.6472	33.6402	27.6992	96.1706	92.382	52.5487	80.3671	-1.53485	0.000347087	0.00897003
LOC_Os05g39950	23477065	23478850	318.428	306.711	372.846	332.661	1322.35	614.448	470.019	802.271	-1.26918	0.000796926	0.0174634
LOC_Os05g40010	23508004	23509669	5321.67	1790.15	1516.61	2876.14	10476.3	8094.17	8226.79	8932.41	-1.63486	0.000117281	0.00361851
LOC_Os05g40890	23978509	23979761	842.742	1363.35	788.677	998.257	269.531	170.799	204.356	214.895	2.21748	2.92024e-12	5.08973e-10
LOC_Os05g41390	24240401	24243654	34.8962	153.787	46.7226	78.4687	10.1232	6.44526	8.75812	8.4422	3.22237	6.78888e-07	4.37916e-05
LOC_Os05g41750	24423072	24426490	175.353	178.843	126.151	160.116	41.7583	56.9331	89.5274	62.7396	1.34456	0.000345727	0.00896371
LOC_Os05g41830	24496497	24501715	0	0	0	0	12.654	9.66789	6.81187	9.71126	-5.88585	0.000204047	0.00570075
LOC_Os05g41970	24576897	24577736	467855	95762	118533	227383	844789	573753	550562	656368	-1.52938	0.00193414	0.0350569
LOC_Os05g42070	24616204	24617365	2.61721	3.45589	4.67226	3.58179	15.1848	22.5584	37.9518	25.2317	-2.82912	0.000190952	0.00539793
LOC_Os05g43140	25044639	25045646	67.1751	156.379	48.5915	90.7153	17.7156	11.8163	22.3819	17.3046	2.38811	9.81568e-06	0.000450836
LOC_Os05g43390	25229675	25233242	27.0445	16.4155	14.0168	19.1589	50.6161	59.0815	72.0112	60.5696	-1.66115	0.000325215	0.00847426
LOC_Os05g43530	25300749	25304668	84.6232	91.5812	110.265	95.4899	36.6967	36.5231	49.6293	40.9497	1.21634	0.000904305	0.0193178
LOC_Os05g43610	25357229	25362761	139.585	247.096	132.692	173.124	58.2085	18.2616	57.4143	44.6281	1.95795	2.19073e-05	0.000873571
LOC_Os05g44340	25803530	25807160	1054.74	2582.42	1146.57	1594.58	3968.3	6430.22	4263.26	4887.26	-1.61581	1.56926e-05	0.00067154
LOC_Os05g44792	26042952	26049426	38.3858	62.2061	34.5747	45.0555	2.5308	10.7421	9.73124	7.66805	2.52818	4.02811e-05	0.00146022
LOC_Os05g45710	26480056	26481404	128.243	247.96	213.055	196.42	77.1895	50.4878	66.1725	64.6166	1.60635	1.12303e-05	0.000505231
LOC_Os05g45980	26651542	26654648	129.988	104.541	69.1494	101.226	5.06161	20.41	39.8981	21.7899	2.19639	9.71816e-05	0.00311116
LOC_Os05g46350	26863363	26866194	28.7893	33.695	17.7546	26.7463	6.32701	5.37105	4.86562	5.52123	2.28612	0.000803912	0.0175872
LOC_Os05g46480	26927607	26928902	1442.96	2833.83	1449.33	1908.71	4952.78	4106.7	3821.46	4293.65	-1.16948	0.000252293	0.00681708
LOC_Os05g46760	27075947	27077365	32.279	12.9596	14.9512	20.0633	125.275	158.983	120.667	134.975	-2.74816	1.71342e-10	2.32442e-08
LOC_Os05g47730	27345715	27346293	0	1.72795	0	0.575982	5.06161	13.9647	16.5431	11.8565	-4.34228	0.00222118	0.0390216
LOC_Os05g47960	27498769	27499586	27.0445	10.3677	14.0168	17.143	101.232	78.4173	68.1187	82.5894	-2.26462	1.6538e-06	9.32007e-05
LOC_Os05g48290	27683922	27688470	407.413	1183.64	1097.05	896.034	365.701	360.934	428.175	384.937	1.21862	0.00129331	0.0256692
LOC_Os05g48560	27823342	27827903	688.327	585.774	822.317	698.806	234.099	180.467	243.281	219.283	1.672	8.37045e-10	1.01052e-07
LOC_Os05g48710	27920719	27923744	7.85164	8.63974	5.60671	7.36603	21.5118	36.5231	25.3012	27.7787	-1.91413	0.00207782	0.0371242
LOC_Os05g48840	27989730	27990665	51.4718	36.2869	50.4604	46.073	113.886	146.092	138.184	132.721	-1.52872	7.84619e-06	0.000372737
LOC_Os05g49390	28320165	28325897	111.668	76.8936	85.0351	91.1988	24.0426	46.191	44.7637	38.3325	1.24213	0.00217135	0.0383527
LOC_Os05g49440	28346740	28348039	576.659	957.283	690.559	741.5	1672.86	1406.14	1448.98	1509.33	-1.02516	0.000170537	0.00495932
LOC_Os05g49860	28611973	28612798	218.973	140.828	111.2	157	73.3933	40.82	56.4412	56.8848	1.46915	0.000174992	0.00507206
LOC_Os05g50770	29119644	29121884	131.733	128.732	122.413	127.626	332.801	250.291	275.394	286.162	-1.16362	2.16287e-05	0.000864744
LOC_Os05g50920	29221404	29224479	402.178	288.567	360.698	350.481	1026.24	919.523	741.521	895.762	-1.35338	3.64266e-07	2.4456e-05
LOC_Os05g50990	29257803	29262204	236.422	178.843	164.463	193.242	78.4549	60.1557	72.9843	70.5317	1.45588	5.32273e-06	0.000264309
LOC_Os05g51110	29317524	29324891	198.908	273.88	211.186	227.991	89.8436	79.4915	137.211	102.182	1.15472	0.000492441	0.0118357
LOC_Os06g01250	163205	165539	6.10683	0.863974	4.67226	3.88102	11.3886	54.7847	72.0112	46.0615	-3.57901	8.23812e-06	0.000389248
LOC_Os06g02530	875372	876367	100.326	114.045	89.7073	101.359	30.3697	5.37105	38.925	24.8886	2.02464	0.000174669	0.00506828
LOC_Os06g02770	1010096	1010680	306.214	69.9819	102.79	159.662	630.17	468.355	318.212	472.246	-1.56363	0.00128642	0.0255516
LOC_Os06g03710	1465499	1468600	85.4956	107.133	42.9848	78.5377	15.1848	20.41	20.4356	18.6768	2.06758	2.08748e-05	0.000841321
LOC_Os06g03720	1470865	1472141	112.54	161.563	92.5107	122.205	34.1659	11.8163	10.7044	18.8955	2.7188	3.8449e-08	3.30686e-06
LOC_Os06g04240	1785159	1785889	35.7686	22.4633	21.4924	26.5748	111.355	187.987	103.151	134.164	-2.33477	1.84773e-08	1.72441e-06
LOC_Os06g04790	2088474	2091021	149.181	120.092	98.1174	122.464	833.9	557.515	518.675	636.697	-2.3767	1.5596e-14	3.9467e-12
LOC_Os06g04940	2175882	2176926	19.1929	19.8714	23.3613	20.8085	55.6777	239.549	84.6618	126.629	-2.60763	1.22373e-06	7.14102e-05
LOC_Os06g05160	2292595	2298805	44.4926	106.269	53.2637	68.0084	1.2654	10.7421	1.94625	4.65125	3.8558	4.43277e-08	3.70979e-06
LOC_Os06g05790	2631869	2635262	47.1098	61.3421	57.0015	55.1512	16.4502	13.9647	20.4356	16.9502	1.69766	0.000226538	0.00623644
LOC_Os06g06270	2900815	2901141	333.258	101.085	83.1662	172.503	26.5734	54.7847	52.5487	44.6356	1.94605	0.000265731	0.00716373
LOC_Os06g06460	3040092	3041121	198.036	255.736	120.544	191.439	64.5355	25.781	35.0325	41.783	2.20587	3.41368e-07	2.30954e-05
LOC_Os06g06510	3056088	3056861	184.95	284.247	108.396	192.531	68.3317	18.2616	46.71	44.4344	2.12151	1.51731e-05	0.000651429
LOC_Os06g06520	3057016	3059017	693.561	737.833	1152.18	861.191	2086.65	1861.61	1630.96	1859.74	-1.11075	8.51046e-05	0.0028138
LOC_Os06g07220	3455733	3456811	1.74481	0	0	0.581603	282.185	1786.41	2031.88	1366.83	-11.1811	2.1302e-13	4.52118e-11
LOC_Os06g07640	3696117	3697876	136.967	273.88	213.055	207.967	15.1848	8.59368	10.7044	11.4943	4.19176	1.34402e-20	6.55036e-18
LOC_Os06g07905	3840732	3844896	7.85164	12.0956	77.5595	32.5022	234.099	415.719	252.039	300.619	-3.21132	0.0010146	0.0210586
LOC_Os06g08890	4472342	4476668	7.85164	16.4155	17.7546	14.0072	21.5118	60.1557	57.4143	46.3606	-1.73454	0.00274366	0.0454013
LOC_Os06g09340	4700489	4703227	0	0.863974	0.934451	0.599475	3.79621	23.6326	46.71	24.7129	-5.38598	5.92266e-05	0.00203788
LOC_Os06g09600	4885944	4886653	174.481	115.772	99.9863	130.08	326.474	222.361	259.824	269.553	-1.04951	0.00133516	0.0262033
LOC_Os06g10530	5431526	5432214	30.5341	10.3677	13.0823	17.9947	74.6587	66.601	39.8981	60.3859	-1.7417	0.00110111	0.0224122
LOC_Os06g11290	5918106	5919690	153.543	376.692	311.172	280.469	77.1895	66.601	73.9574	72.5827	1.95069	2.33269e-07	1.63668e-05
LOC_Os06g11650	6177853	6179163	9.59645	3.45589	12.1479	8.40007	112.621	59.0815	36.0056	69.236	-3.04375	5.54595e-07	3.62179e-05
LOC_Os06g11700	6199474	6200741	0	2.59192	0	0.863974	40.4929	18.2616	8.75812	22.5042	-4.66637	8.8407e-05	0.00288314
LOC_Os06g12810	7000436	7004404	20.9377	15.5515	8.41006	14.9664	1.2654	0	0.973124	0.746176	4.35714	0.000880604	0.0188881
LOC_Os06g13270	7298665	7302170	34.8962	19.8714	8.41006	21.0592	2.5308	3.22263	1.94625	2.56656	3.04426	0.000848942	0.0183436
LOC_Os06g13670	7584780	7590605	30.5341	65.662	17.7546	37.9836	5.06161	10.7421	11.6775	9.1604	2.03816	0.00230702	0.0401827
LOC_Os06g14240	7940906	7941692	45.365	75.1657	33.6402	51.3903	264.469	259.959	154.727	226.385	-2.13588	5.0048e-08	4.12904e-06
LOC_Os06g14370	8011835	8014837	311.448	450.13	398.076	386.552	1121.15	731.537	667.563	840.082	-1.11912	0.000189872	0.00537896
LOC_Os06g14460	8127437	8129380	29.6617	59.6142	24.2957	37.8572	5.06161	6.44526	11.6775	7.72812	2.2739	0.000437524	0.0107674
LOC_Os06g14620	8230482	8232132	220.718	273.88	188.759	227.786	115.152	93.4562	105.097	104.568	1.1249	0.000176369	0.00510074
LOC_Os06g15430	8767235	8768349	4.36202	38.8788	43.9192	29.0533	5.06161	6.44526	1.94625	4.48437	2.70807	0.00237503	0.0411224
LOC_Os06g16240	9246577	9248376	827.912	882.117	631.689	780.573	511.223	330.857	294.857	378.979	1.04424	0.000532533	0.0126377
LOC_Os06g16300	9289219	9291362	14.8309	13.8236	14.9512	14.5352	37.9621	55.8589	42.8175	45.5461	-1.64993	0.000627532	0.0143408
LOC_Os06g18670	10588145	10589939	57.5787	103.677	91.5762	84.2772	264.469	333.005	152.781	250.085	-1.56843	3.91898e-05	0.00142853
LOC_Os06g20310	11669578	11673430	43.6202	63.934	53.2637	53.606	22.7772	21.4842	15.57	19.9438	1.43362	0.00173753	0.0323169
LOC_Os06g21360	12333262	12337541	254.742	362.869	363.502	327.037	536.531	875.481	946.85	786.287	-1.26646	3.99358e-05	0.00145238
LOC_Os06g21910	12665586	12666215	241.656	215.993	120.544	192.731	884.516	973.234	784.338	880.696	-2.19112	2.07299e-12	3.76254e-10
LOC_Os06g22070	12801432	12804044	211.994	186.618	209.317	202.643	80.9858	85.9368	107.044	91.3221	1.1467	9.57466e-05	0.00307823
LOC_Os06g22760	13244910	13245626	3.48962	6.04781	1.8689	3.80211	37.9621	32.2263	24.3281	31.5055	-3.03694	1.40003e-05	0.000608018
LOC_Os06g22960	13407319	13408859	54.0891	56.1583	50.4604	53.5692	130.336	292.185	240.362	220.961	-2.046	3.27068e-08	2.86926e-06
LOC_Os06g23030	13439148	13439922	18.3205	13.8236	11.2134	14.4525	93.6398	63.3784	54.495	70.5044	-2.27962	1.13858e-06	6.67375e-05
LOC_Os06g24490	14347071	14348330	3.48962	1.72795	0	1.73919	41.7583	37.5973	26.2744	35.21	-4.31423	2.53517e-07	1.76977e-05
LOC_Os06g26010	15227359	15232637	27.9169	39.7428	35.5091	34.3896	34.1659	127.831	148.888	103.628	-1.59575	0.00194029	0.0350959
LOC_Os06g27770	15724697	15727772	810.464	1383.22	1459.61	1217.77	699.768	241.697	319.185	420.216	1.53646	0.000139687	0.00420808
LOC_Os06g28880	16471613	16481720	211.122	140.828	147.643	166.531	59.4739	67.6752	77.8499	68.333	1.28217	0.000117545	0.00362244
LOC_Os06g29700	17044170	17046351	117.775	82.0775	100.921	100.258	43.0237	41.8942	42.8175	42.5784	1.23556	0.000551753	0.013
LOC_Os06g30179	17411745	17428547	1.74481	3.45589	2.80335	2.66802	8.85782	22.5584	33.0862	21.5008	-3.02006	0.000452872	0.011046
LOC_Os06g30280	17470732	17471497	191.929	120.092	88.7729	133.598	582.085	311.521	289.991	394.532	-1.56026	5.92363e-05	0.00203788
LOC_Os06g30370	17539922	17542480	1083.53	1512.82	1213.85	1270.07	6499.11	2878.88	2542.77	3973.59	-1.64533	7.36387e-06	0.000354301
LOC_Os06g33690	19604055	19606116	445.799	407.796	601.787	485.127	1505.83	1040.91	980.909	1175.88	-1.27709	9.61809e-06	0.000442839
LOC_Os06g34560	20098734	20100496	4.36202	9.50371	8.41006	7.42526	0	0	0	0	5.20025	0.00199799	0.0359174
LOC_Os06g35160	20490195	20492274	113.413	85.5334	61.6738	86.8732	21.5118	30.0779	15.57	22.3866	1.9603	1.31855e-05	0.00057644
LOC_Os06g35660	20812521	20814107	164.884	245.368	186.89	199.048	11.3886	1.07421	6.81187	6.4249	4.98958	6.12651e-22	3.22475e-19
LOC_Os06g36030	21060820	21062007	7.85164	5.18384	2.80335	5.27961	26.5734	19.3358	28.2206	24.7099	-2.22024	0.00130029	0.0257494
LOC_Os06g37020	21841186	21842474	509.484	300.663	293.418	367.855	1397	586.518	605.283	862.935	-1.22923	0.00170094	0.0318615
LOC_Os06g39240	23293234	23294078	928.238	819.047	607.393	784.893	3840.5	1478.11	918.629	2079.08	-1.40496	0.00157761	0.0299133
LOC_Os06g39370	23367125	23368831	160.522	110.589	67.2805	112.797	411.256	224.51	211.168	282.311	-1.32097	0.000973982	0.0204086
LOC_Os06g39875	23689553	23691740	132.605	93.3091	56.0671	93.9939	320.147	479.097	348.378	382.541	-2.02397	2.02555e-08	1.85744e-06
LOC_Os06g40120	23875408	23879965	417.882	152.059	252.302	274.081	1198.34	980.753	751.252	976.78	-1.83308	8.60359e-07	5.31524e-05
LOC_Os06g40530	24157235	24159711	1.74481	8.63974	3.73781	4.70745	56.9431	35.4489	22.3819	38.258	-3.01219	2.22783e-05	0.000884344
LOC_Os06g40590	24198169	24206081	114.285	182.298	114.938	137.174	41.7583	34.3747	62.28	46.1376	1.56767	5.614e-05	0.00194407
LOC_Os06g41030	24502390	24507547	399.561	575.406	234.547	403.172	116.417	73.0462	160.566	116.676	1.78786	8.61996e-06	0.000400982
LOC_Os06g41120	24586164	24586853	88.1128	85.5334	43.9192	72.5218	15.1848	12.8905	15.57	14.5484	2.31887	1.88242e-06	0.000104518
LOC_Os06g42020	25231214	25235898	127.371	724.01	376.584	409.322	20.2464	16.1131	19.4625	18.6074	4.46064	6.40516e-17	2.21804e-14
LOC_Os06g43150	25936095	25941001	0	1.72795	2.80335	1.51043	5.06161	21.4842	21.4087	15.9848	-3.42662	0.00167448	0.0314779
LOC_Os06g43910	26450761	26454696	8.72404	60.4781	27.0991	32.1004	0	0	0	0	7.31321	2.84458e-07	1.9701e-05
LOC_Os06g44040	26563139	26566299	15.7033	17.2795	2.80335	11.9287	58.2085	47.2652	49.6293	51.701	-2.10714	0.000321656	0.00840454
LOC_Os06g45480	27495294	27499532	3598.67	1632.05	1546.52	2259.08	7470.94	9811.83	9236.9	8839.89	-1.96827	1.75528e-08	1.65575e-06
LOC_Os06g45920	27800908	27802149	76.7716	133.916	83.1662	97.9512	5.06161	0	0.973124	2.01158	5.72344	3.09397e-13	6.31218e-11
LOC_Os06g46030	27904549	27906635	2.61721	1.72795	2.80335	2.38284	5.06161	23.6326	22.3819	17.0254	-2.84981	0.00246543	0.0421606
LOC_Os06g46284	28045147	28058082	10916.4	12766.1	12867.4	12183.3	34036.8	29916.7	22290.4	28748	-1.23854	8.72376e-07	5.37686e-05
LOC_Os06g46340	28100801	28106083	4.36202	8.63974	5.60671	6.20282	40.4929	64.4526	86.6081	63.8512	-3.36594	3.35868e-09	3.6227e-07
LOC_Os06g46570	28275643	28279475	129.988	108.861	88.7729	109.207	402.398	736.908	843.699	661.001	-2.59793	2.46101e-14	5.90806e-12
LOC_Os06g46740	28388296	28389574	27.9169	27.6472	14.0168	23.1936	88.5782	55.8589	59.3606	67.9325	-1.54347	0.000732541	0.0164637
LOC_Os06g46900	28463764	28466297	1402.83	1708.94	1252.16	1454.64	3114.16	3408.47	2626.46	3049.69	-1.06786	1.50275e-05	0.00064623
LOC_Os06g46950	28483807	28484624	76.7716	57.8862	38.3125	57.6568	260.673	198.729	111.909	190.437	-1.71995	2.81026e-05	0.00107657
LOC_Os06g46970	28489960	28490687	16.5757	20.7354	26.1646	21.1586	267	189.061	120.667	192.243	-3.18333	1.74123e-14	4.32319e-12
LOC_Os06g46980	28493288	28493572	36.641	21.5993	16.8201	25.0201	226.507	58.0073	43.7906	109.435	-2.12293	0.000449739	0.0110104
LOC_Os06g47220	28629101	28629909	16.5757	29.3751	33.6402	26.5303	132.867	49.4136	54.495	78.9253	-1.56875	0.00216615	0.0382867
LOC_Os06g47230	28639652	28641372	4122.11	4001.06	4006.93	4043.37	19778.2	8933.13	7133.97	11948.4	-1.56312	1.7725e-05	0.000734624
LOC_Os06g48170	29137237	29139250	44.4926	52.7024	40.1814	45.7921	110.09	88.0852	126.506	108.227	-1.24064	0.000452018	0.0110457
LOC_Os06g48960	29665219	29667372	105.561	129.596	122.413	119.19	265.734	270.701	218.953	251.796	-1.07822	0.000113213	0.00353025
LOC_Os06g49190	29807815	29808464	0	0	0	0	3.79621	37.5973	32.1131	24.5022	-7.23222	1.08939e-06	6.4284e-05
LOC_Os06g49620	30028720	30029109	243.401	657.484	483.111	461.332	174.626	22.5584	64.2262	87.1367	2.40961	1.89342e-05	0.000773774
LOC_Os06g50410	30521808	30523034	37.5134	12.9596	27.0991	25.8574	75.9241	84.8626	78.8231	79.8699	-1.62828	0.000321738	0.00840454
LOC_Os06g50930	30823392	30826114	0	1.72795	0.934451	0.887466	11.3886	48.3394	38.925	32.8843	-5.2151	1.6643e-06	9.33922e-05
LOC_Os06g51050	30887215	30888471	14.8309	153.787	26.1646	64.9276	0	2.14842	0	0.71614	6.48272	5.68247e-07	3.69263e-05
LOC_Os06g51110	30915029	30918862	29.6617	107.997	39.247	58.9685	6.32701	4.29684	15.57	8.73128	2.7377	5.06168e-05	0.00177629
LOC_Os07g01030	17515	21408	351.579	251.416	267.253	290.083	577.023	1025.87	980.909	861.268	-1.57054	3.46677e-07	2.33746e-05
LOC_Os07g01090	48787	53212	19.1929	7.77576	8.41006	11.7929	65.8009	34.3747	77.8499	59.3419	-2.32923	2.91587e-05	0.00111056
LOC_Os07g01460	299704	301426	4.36202	0.863974	0	1.742	30.3697	15.0389	13.6237	19.6774	-3.47486	0.00052151	0.0124209
LOC_Os07g01490	306009	309744	23.5549	175.387	99.0518	99.3311	17.7156	21.4842	29.1937	22.7979	2.11832	0.000518761	0.0123778
LOC_Os07g01540	335223	343722	210.249	104.541	132.692	149.161	342.924	952.824	882.624	726.124	-2.28391	2.78069e-08	2.46405e-06
LOC_Os07g01620	383526	385000	12873.2	15582.6	12103	13519.6	598.535	97.7531	213.114	303.134	5.48096	1.04168e-29	1.0966e-26
LOC_Os07g01700	418936	419497	98.5817	95.0371	60.7393	84.786	45.5545	29.0037	27.2475	33.9352	1.33082	0.00139422	0.0270199
LOC_Os07g01820	471174	477655	21.8101	26.7832	19.6235	22.7389	0	0	0.973124	0.324375	5.85405	1.69591e-05	0.000710471
LOC_Os07g02200	699844	700831	2118.2	1057.5	1111.06	1428.92	970.564	455.465	524.514	650.181	1.13687	0.00260137	0.0437183
LOC_Os07g02430	834299	835728	223.335	230.681	261.646	238.554	148.052	75.1947	96.3393	106.529	1.16749	0.000426396	0.0105841
LOC_Os07g03040	1149397	1155205	60.1959	96.765	30.8369	62.5993	2.5308	1.07421	3.8925	2.49917	4.63031	2.15746e-09	2.36584e-07
LOC_Os07g05960	2883039	2892647	205.887	300.663	230.809	245.787	30.3697	78.4173	115.802	74.8629	1.70749	7.57056e-05	0.00252484
LOC_Os07g06450	3122611	3124604	246.89	171.067	154.184	190.714	98.7014	67.6752	74.9306	80.4357	1.24929	0.000217857	0.00601003
LOC_Os07g06830	3332886	3334275	114.285	95.9011	55.1326	88.4395	749.118	501.656	363.948	538.241	-2.60323	2.72403e-12	4.81147e-10
LOC_Os07g07080	3491976	3499332	2554.4	2329.27	2483.77	2455.81	4213.79	7153.16	5755.06	5707.34	-1.21671	4.48257e-06	0.000229518
LOC_Os07g07350	3675965	3678411	716.244	734.378	729.806	726.809	2067.67	1200.97	1107.42	1458.68	-1.00448	0.000759208	0.0169186
LOC_Os07g07450	3713295	3714092	109.923	95.0371	75.6906	93.5502	360.64	175.096	133.318	223.018	-1.24991	0.00210133	0.0374172
LOC_Os07g08140	4139160	4142449	88.9852	71.7098	49.5259	70.0737	159.441	187.987	162.512	169.98	-1.27719	0.000138551	0.00418162
LOC_Os07g08150	4143340	4144573	29.6617	31.967	16.8201	26.1496	91.109	119.237	144.996	118.447	-2.17858	7.69419e-08	6.06275e-06
LOC_Os07g08160	4145912	4146866	17.4481	17.2795	0.934451	11.8873	63.2701	54.7847	58.3875	58.8141	-2.29886	0.00036776	0.00942425
LOC_Os07g08240	4199248	4201268	16.5757	15.5515	19.6235	17.2502	3.79621	1.07421	2.91937	2.5966	2.7485	0.00182322	0.0334023
LOC_Os07g08970	4663405	4667457	40.1306	31.103	43.9192	38.3843	98.7014	133.202	106.071	112.658	-1.55554	1.48722e-05	0.000640601
LOC_Os07g09050	4729466	4733531	8.72404	9.50371	7.47561	8.56779	21.5118	36.5231	34.0594	30.6981	-1.84431	0.00169651	0.0318012
LOC_Os07g09150	4774603	4776611	436.202	237.593	230.809	301.535	776.957	525.288	522.568	608.271	-1.01149	0.00266878	0.0445724
LOC_Os07g09970	5313788	5318164	93.3473	80.3495	87.8384	87.1784	320.147	181.541	135.264	212.317	-1.28115	0.000609214	0.0139785
LOC_Os07g10420	5598638	5600789	189.312	117.5	77.5595	128.124	402.398	215.916	250.093	289.469	-1.17374	0.00281411	0.0462597
LOC_Os07g10570	5736875	5737846	242811	47226.5	60088	116709	400463	381436	324449	368783	-1.65986	0.000750176	0.0167457
LOC_Os07g10680	5800864	5802591	0.872404	2.59192	1.8689	1.77774	15.1848	13.9647	14.5969	14.5821	-3.03525	0.00148926	0.0286326
LOC_Os07g11120	6137056	6141197	2101.62	2494.29	2859.42	2485.11	9732.21	4770.56	4622.34	6375.04	-1.35902	4.45185e-05	0.0015919
LOC_Os07g11160	6155363	6158910	6.97923	12.0956	9.34451	9.47313	6.32701	70.8978	91.4737	56.2328	-2.5745	0.000601691	0.0138542
LOC_Os07g11330	6244130	6244880	10731.4	6978.31	8318.49	8676.08	77552.7	71173.9	78977.8	75901.5	-3.12901	2.95564e-36	5.55618e-33
LOC_Os07g11900	6609124	6609689	4957	6351.07	7655.96	6321.34	22395.1	10561.6	8368.87	13775.2	-1.12372	0.0024503	0.0420415
LOC_Os07g15540	9005169	9008499	0	11.2317	3.73781	4.98982	8.85782	54.7847	62.28	41.9742	-3.07309	0.000696303	0.0157705
LOC_Os07g16320	9531002	9531908	0	3.45589	1.8689	1.77493	34.1659	74.1205	55.4681	54.5848	-4.94359	6.54838e-10	8.01582e-08
LOC_Os07g16330	9533784	9534851	0.872404	3.45589	3.73781	2.6887	26.5734	67.6752	36.9787	43.7425	-4.03345	7.63651e-08	6.03536e-06
LOC_Os07g17010	10018726	10020736	172.736	769.8	412.093	451.543	130.336	62.3042	75.9037	89.5148	2.3379	1.34551e-06	7.71189e-05
LOC_Os07g17160	10090647	10093403	249.508	209.946	217.727	225.727	101.232	93.4562	93.4199	96.0361	1.23406	1.12993e-05	0.000507467
LOC_Os07g17330	10231829	10232702	168.374	159.835	74.7561	134.322	339.128	322.263	289.991	317.127	-1.23782	0.000380794	0.00967349
LOC_Os07g18600	10993119	10994274	0	0	0	0	12.654	7.51947	0.973124	7.04887	-5.4176	0.00308076	0.0496811
LOC_Os07g18610	10998043	10999717	22.6825	39.7428	20.5579	27.6611	1.2654	0	3.8925	1.7193	3.95554	2.37723e-05	0.000931009
LOC_Os07g18670	11033623	11035516	14.8309	55.2943	24.2957	31.4736	8.85782	3.22263	2.91937	4.99994	2.68953	0.000543703	0.0128449
LOC_Os07g18750	11090520	11091267	22.6825	13.8236	6.54116	14.3491	2.5308	1.07421	0	1.20167	3.66943	0.00225001	0.0394247
LOC_Os07g22680	12777061	12778037	41.8754	19.0074	10.279	23.7206	6.32701	4.29684	0.973124	3.86566	2.65658	0.00227025	0.0396607
LOC_Os07g23120	13037520	13038640	11.3413	6.04781	2.80335	6.73081	41.7583	25.781	22.3819	29.9737	-2.14257	0.00155054	0.0294636
LOC_Os07g23570	13323931	13326401	5.23443	20.7354	22.4268	16.1322	2.5308	2.14842	0.973124	1.88412	3.12526	0.0026572	0.0445142
LOC_Os07g24000	13607703	13609045	372.517	241.049	133.627	249.064	1061.67	1228.9	1085.03	1125.2	-2.17503	9.15703e-10	1.09047e-07
LOC_Os07g24050	13638268	13642669	5.23443	18.1434	15.8857	13.0878	0	1.07421	0	0.35807	5.05597	0.000770797	0.0170875
LOC_Os07g26410	15173292	15177870	0.872404	1.72795	1.8689	1.48975	8.85782	25.781	15.57	16.7363	-3.49948	0.000494927	0.0118737
LOC_Os07g26560	15297878	15302052	4.36202	0.863974	0	1.742	32.9005	9.66789	15.57	19.3794	-3.45329	0.000845885	0.018315
LOC_Os07g26630	15358960	15360495	138.712	139.1	124.282	134.031	723.81	349.118	349.352	474.093	-1.8209	1.86479e-07	1.34092e-05
LOC_Os07g26900	15579953	15584476	603.704	572.814	449.471	541.996	72.1279	34.3747	50.6025	52.3684	3.37927	2.9069e-24	2.06767e-21
LOC_Os07g29330	17198415	17209485	285.276	282.519	269.122	278.973	30.3697	107.421	107.044	81.6114	1.76664	2.54386e-05	0.000990373
LOC_Os07g29640	17426381	17429427	165.757	190.074	185.956	180.596	409.99	330.857	370.76	370.536	-1.03637	5.80589e-05	0.00200524
LOC_Os07g31650	18800968	18806189	30.5341	62.2061	40.1814	44.3072	122.744	119.237	135.264	125.749	-1.50449	5.95573e-05	0.00204625
LOC_Os07g32080	19068310	19069374	0	0	0	0	20.2464	23.6326	19.4625	21.1138	-7.01134	4.11796e-07	2.74371e-05
LOC_Os07g32480	19328726	19331908	110.795	109.725	62.6082	94.3761	24.0426	24.7068	57.4143	35.3879	1.40591	0.00253893	0.0429709
LOC_Os07g33360	19938443	19943169	93.3473	98.493	83.1662	91.6688	37.9621	23.6326	41.8443	34.4797	1.41059	0.000277659	0.00744137
LOC_Os07g33370	19943776	19951055	30.5341	88.1253	29.9024	49.5206	2.5308	2.14842	11.6775	5.45224	3.14626	2.59508e-05	0.00100586
LOC_Os07g34006	20313830	20316226	11.3413	12.9596	24.2957	16.1989	41.7583	22.5584	221.872	95.3963	-2.56402	0.000338129	0.00879336
LOC_Os07g34220	20477074	20478169	0	0	0	0	16.4502	2.14842	8.75812	9.11892	-5.79276	0.00062773	0.0143408
LOC_Os07g34589	20733146	20735347	12277.3	4882.31	5706.69	7622.12	30269.7	17534.3	14293.2	20699.1	-1.44127	0.000280732	0.00748273
LOC_Os07g34710	20803306	20805476	48.8546	107.997	23.3613	60.0709	6.32701	0	2.91937	3.08213	4.33321	1.58784e-07	1.15758e-05
LOC_Os07g35310	21133028	21140733	139.585	95.9011	89.7073	108.398	27.8389	47.2652	63.2531	46.1191	1.22427	0.00285642	0.0467582
LOC_Os07g35340	21146479	21149745	39.2582	31.967	15.8857	29.037	3.79621	2.14842	7.78499	4.57654	2.64555	0.000404839	0.0101472
LOC_Os07g35370	21155350	21158796	9.59645	8.63974	3.73781	7.32466	0	0	0	0	5.18275	0.00226416	0.0396198
LOC_Os07g36230	21653254	21657381	47.9822	38.0148	28.0335	38.0102	10.1232	8.59368	10.7044	9.80709	1.9549	0.000475839	0.0115172
LOC_Os07g36800	22045994	22048316	61.9407	38.0148	49.5259	49.8272	153.114	127.831	130.399	137.114	-1.45937	2.1567e-05	0.000863926
LOC_Os07g37010	22169511	22171932	313.193	212.537	213.989	246.573	134.133	81.6399	115.802	110.525	1.15974	0.00040859	0.0102218
LOC_Os07g37290	22343452	22343673	16.5757	18.1434	16.8201	17.1797	177.156	26.8552	36.9787	80.3301	-2.21917	0.00069524	0.01576
LOC_Os07g37320	22353094	22355806	25.2997	18.1434	14.9512	19.4648	53.1469	47.2652	50.6025	50.3382	-1.36801	0.00268682	0.0448109
LOC_Os07g37350	22370220	22372673	77.644	47.5185	45.7881	56.9835	112.621	151.464	148.888	137.657	-1.2732	0.000403672	0.0101276
LOC_Os07g37620	22543276	22544955	1244.05	1367.67	1255.9	1289.21	3586.15	2374	1960.85	2640.33	-1.03393	0.000276527	0.0074186
LOC_Os07g38130	22874252	22875707	4.36202	6.04781	2.80335	4.4044	13.9194	42.9684	28.2206	28.3695	-2.68668	0.000246504	0.00668124
LOC_Os07g38260	22939104	22954819	232.06	489.873	491.521	404.485	87.3128	183.69	229.657	166.887	1.27412	0.00197511	0.0355303
LOC_Os07g38290	22996769	23001763	10869.3	11330.1	11698.4	11299.3	5908.16	2485.72	2224.56	3539.48	1.67485	4.51748e-06	0.000230856
LOC_Os07g38380	23069680	23074579	437.947	252.28	218.662	302.963	627.64	755.169	813.532	732.114	-1.27294	7.46717e-05	0.00249392
LOC_Os07g39020	23398209	23400655	36.641	63.934	35.5091	45.3614	15.1848	8.59368	13.6237	12.4674	1.86904	0.000563091	0.0131845
LOC_Os07g39750	23819798	23824129	952.665	1100.7	1277.39	1110.25	3179.96	2318.14	1737.03	2411.71	-1.11894	0.000122214	0.00374438
LOC_Os07g39860	23902874	23903545	1.74481	0.863974	0.934451	1.18108	72.1279	47.2652	19.4625	46.2852	-5.282	2.16537e-08	1.97876e-06
LOC_Os07g39970	23980540	23981251	2.61721	4.31987	2.80335	3.24681	68.3317	15.0389	20.4356	34.6021	-3.40197	2.68614e-05	0.00103657
LOC_Os07g40000	23996515	23997565	48.8546	22.4633	14.0168	28.4449	8.85782	5.37105	2.91937	5.71608	2.34322	0.0019491	0.0352068
LOC_Os07g41170	24642292	24643406	45.365	76.0297	55.1326	58.8424	22.7772	29.0037	15.57	22.4503	1.39482	0.00278663	0.0459124
LOC_Os07g41240	24713778	24715813	12.2137	60.4781	14.9512	29.2143	142.99	110.644	103.151	118.928	-2.0215	0.000234122	0.00639836
LOC_Os07g41290	24744455	24745346	20607.1	36286.9	33432.8	30108.9	13662.5	6486.08	9588.19	9912.27	1.60295	1.8704e-06	0.00010429
LOC_Os07g41310	24751588	24755397	431.84	369.781	605.524	469.048	745.322	1309.46	817.424	957.403	-1.02985	0.0012713	0.0252705
LOC_Os07g41360	24773276	24776526	314.938	467.41	332.665	371.671	191.076	104.198	109.963	135.079	1.46445	1.47444e-05	0.000636136
LOC_Os07g41650	24961169	24964384	1204.79	1079.1	1163.39	1149.1	2929.41	2238.65	2245.97	2471.34	-1.10459	2.92674e-06	0.000155424
LOC_Os07g41810	25045256	25048472	2823.97	3516.37	3933.11	3424.48	15105.1	7183.24	5945.79	9411.38	-1.45845	4.6763e-05	0.00165864
LOC_Os07g41830	25051856	25054198	27.0445	26.7832	20.5579	24.7952	65.8009	99.9015	91.4737	85.7254	-1.79067	8.37972e-06	0.000394364
LOC_Os07g42160	25226231	25229380	50.5994	96.765	60.7393	69.3679	297.37	248.142	295.83	280.447	-2.01435	1.48042e-09	1.66503e-07
LOC_Os07g42390	25363519	25365553	11349.1	12259.8	11861.9	11823.6	66976.5	21406.8	20546.5	36310	-1.61867	9.86793e-05	0.00315175
LOC_Os07g42970	25741014	25744880	44.4926	17.2795	5.60671	22.4596	99.9668	83.7883	75.9037	86.5529	-1.94153	0.000815073	0.0177428
LOC_Os07g43160	25867212	25871233	2044.92	4115.97	3036.03	3065.64	1655.15	1018.35	1201.81	1291.77	1.24715	0.000110104	0.00344966
LOC_Os07g43250	25907654	25908499	63.6855	88.9893	34.5747	62.4165	13.9194	12.8905	6.81187	11.2073	2.49289	7.59586e-06	0.00036357
LOC_Os07g43540	26044540	26047492	93.3473	101.949	101.855	99.0504	17.7156	29.0037	37.9518	28.2237	1.79775	7.74578e-06	0.000369132
LOC_Os07g43740	26173595	26174386	578.404	463.954	262.581	434.98	1519.75	1271.86	875.812	1222.47	-1.49012	1.64374e-05	0.000694693
LOC_Os07g43770	26188128	26190004	36.641	30.2391	23.3613	30.0804	103.763	80.5657	121.641	101.99	-1.76044	5.84021e-06	0.000287833
LOC_Os07g44290	26464176	26468859	153.543	164.155	135.495	151.065	292.308	403.903	392.169	362.793	-1.26469	4.94775e-06	0.000248502
LOC_Os07g45060	26882080	26884077	830.529	455.314	556.933	614.259	1400.8	1239.64	1086.98	1242.47	-1.01602	0.000549296	0.0129537
LOC_Os07g45530	27158092	27164838	24.4273	23.3273	13.0823	20.279	3.79621	2.14842	3.8925	3.27904	2.63214	0.00121406	0.0242608
LOC_Os07g46280	27615397	27618751	24.4273	76.8936	47.657	49.6593	11.3886	16.1131	12.6506	13.3841	1.88897	0.000937915	0.0198904
LOC_Os07g46360	27652944	27654087	47.1098	36.2869	35.5091	39.6353	116.417	124.608	110.936	117.32	-1.56463	5.24085e-06	0.000261229
LOC_Os07g46480	27746308	27748010	0	0	0	0	1.2654	12.8905	44.7637	19.6399	-6.91521	1.82832e-05	0.000754197
LOC_Os07g46520	27783648	27786920	14.8309	16.4155	24.2957	18.514	62.0047	62.3042	46.71	57.0063	-1.62351	0.000361558	0.00930155
LOC_Os07g46910	28044881	28046299	5.23443	6.91179	4.67226	5.60616	34.1659	20.41	26.2744	26.9501	-2.25858	0.000556612	0.0130911
LOC_Os07g47040	28118073	28125357	191.057	145.148	142.037	159.414	62.0047	91.3078	78.8231	77.3785	1.04003	0.00143131	0.0276573
LOC_Os07g47120	28178236	28181579	392.582	146.876	169.136	236.198	1005.99	454.391	527.433	662.606	-1.48728	0.00052396	0.012468
LOC_Os07g47240	28233256	28234642	1392.36	1645.87	1710.05	1582.76	3326.74	4294.69	4266.18	3962.54	-1.32413	2.70203e-08	2.40243e-06
LOC_Os07g47250	28240466	28245450	160.522	110.589	99.9863	123.699	178.422	368.454	422.336	323.071	-1.38633	0.000238123	0.00650096
LOC_Os07g47284	28264040	28267581	59.3235	538.256	625.148	407.576	6.32701	33.3005	33.0862	24.2379	4.06751	0.00013791	0.00417185
LOC_Os07g47300	28277520	28281063	8.72404	29.3751	36.4436	24.8476	2.5308	4.29684	3.8925	3.57338	2.78323	0.000810355	0.0176694
LOC_Os07g47590	28452722	28456569	234.677	328.31	327.992	296.993	830.104	650.971	635.45	705.508	-1.24783	4.19573e-06	0.000216092
LOC_Os07g47790	28540697	28541796	6.97923	21.5993	17.7546	15.4444	196.137	85.9368	63.2531	115.109	-2.89468	1.27025e-07	9.41706e-06
LOC_Os07g47840	28565613	28567185	4.36202	6.91179	0.934451	4.06942	13.9194	68.7494	58.3875	47.0188	-3.52337	4.9862e-06	0.000249481
LOC_Os07g48030	28678385	28680073	157.033	312.758	148.578	206.123	54.4123	45.1168	79.7962	59.7751	1.78305	1.08538e-05	0.000493351
LOC_Os07g48450	28985797	28988032	24.4273	38.0148	43.9192	35.4538	0	5.37105	3.8925	3.08785	3.46859	6.50145e-06	0.000318631
LOC_Os07g48500	29008871	29009943	25.2997	9.50371	20.5579	18.4538	60.7393	79.4915	65.1993	68.4767	-1.89413	6.19537e-05	0.00212304
LOC_Os07g48830	29220283	29221843	8.72404	6.91179	0.934451	5.52343	78.4549	31.1521	32.1131	47.24	-3.07999	1.18658e-05	0.000527508
LOC_Os07g48980	29323094	29324723	191.929	358.549	224.268	258.249	7.59241	21.4842	11.6775	13.5847	4.23654	3.27956e-21	1.68562e-18
LOC_Os08g01100	71343	72715	152.671	256.6	172.873	194.048	29.1043	23.6326	39.8981	30.8783	2.6467	4.29138e-12	7.28649e-10
LOC_Os08g01120	86335	88510	84.6232	44.9266	39.247	56.2656	18.981	25.781	9.73124	18.1644	1.63845	0.00239155	0.0413269
LOC_Os08g01150	102127	107380	116.03	271.288	77.5595	154.959	0	1.07421	5.83875	2.30432	5.97155	8.99692e-15	2.35108e-12
LOC_Os08g01270	172050	179450	117.775	78.6216	64.4771	86.9578	129.071	201.951	252.039	194.354	-1.16184	0.00192561	0.0349375
LOC_Os08g01370	234133	234423	113.413	55.2943	45.7881	71.4983	583.35	389.938	368.814	447.368	-2.64347	7.4874e-12	1.21638e-09
LOC_Os08g01530	321888	323000	75.0268	40.6068	53.2637	56.2991	255.611	126.757	133.318	171.895	-1.60742	6.99179e-05	0.0023591
LOC_Os08g01630	371457	373855	41.003	39.7428	25.2302	35.3253	13.9194	8.59368	2.91937	8.47749	2.09102	0.00118618	0.023776
LOC_Os08g03200	1477538	1484910	0.872404	0	1.8689	0.913769	31.6351	93.4562	52.5487	59.2133	-6.0529	1.56798e-09	1.75601e-07
LOC_Os08g03410	1597234	1599568	164.884	94.1731	80.3628	113.14	3253.35	26757.5	24809.8	18273.5	-7.33538	1.36481e-17	5.13131e-15
LOC_Os08g03610	1686244	1688804	3.48962	6.91179	14.9512	8.45088	0	0	0	0	5.38466	0.00132329	0.0261067
LOC_Os08g03690	1755764	1757166	3.48962	0.863974	0	1.4512	24.0426	123.534	152.781	100.119	-6.09061	1.65805e-11	2.52234e-09
LOC_Os08g04210	2054188	2056025	6.97923	50.1105	9.34451	22.1447	0	0	0.973124	0.324375	5.81684	0.000101737	0.00322592
LOC_Os08g04290	2095644	2100604	456.267	787.08	826.989	690.112	306.227	281.443	235.496	274.389	1.33141	1.47109e-05	0.000635732
LOC_Os08g04520	2232677	2233399	89.8576	189.21	146.709	141.926	82.2512	37.5973	52.5487	57.4657	1.31006	0.00177611	0.0327566
LOC_Os08g04640	2320437	2320994	887.235	908.036	579.36	791.544	27.8389	2.14842	13.6237	14.537	5.79508	2.27926e-32	2.99928e-29
LOC_Os08g04670	2332335	2332910	604.576	659.212	196.235	486.674	3.79621	1.07421	0	1.62347	8.35912	6.6034e-23	3.69762e-20
LOC_Os08g04680	2336257	2337164	201.525	94.1731	65.4116	120.37	2.5308	0	0	0.843602	7.34698	9.01831e-11	1.28991e-08
LOC_Os08g04690	2338798	2339355	10.4689	21.5993	3.73781	11.9353	0	0	0	0	5.88762	0.000215409	0.00595497
LOC_Os08g04700	2341709	2342245	68.0475	82.9415	25.2302	58.7397	2.5308	0	0	0.843602	6.3058	7.05373e-08	5.60846e-06
LOC_Os08g04710	2344012	2344747	1182.11	1060.1	727.938	990.047	79.7203	8.59368	24.3281	37.5474	4.73547	5.94814e-19	2.56628e-16
LOC_Os08g04740	2365410	2366051	8561.78	6435.74	6883.17	7293.56	3183.75	1715.51	3330.03	2743.1	1.41084	4.03789e-06	0.00020878
LOC_Os08g04790	2389729	2393042	569.68	503.697	405.552	492.976	1395.74	953.898	688.972	1012.87	-1.03802	0.0010321	0.0213042
LOC_Os08g05720	3069784	3070533	11.3413	19.8714	1.8689	11.0272	229.038	62.3042	54.495	115.279	-3.37607	9.99457e-07	5.96404e-05
LOC_Os08g05910	3182309	3190451	169.246	225.497	187.825	194.189	29.1043	38.6715	52.5487	40.1082	2.26576	1.15603e-10	1.60976e-08
LOC_Os08g06600	3722365	3726246	35.7686	72.5738	50.4604	52.9342	18.981	6.44526	15.57	13.6654	1.96197	0.000375834	0.00961244
LOC_Os08g07240	4037277	4039081	136.095	41.4707	52.3293	76.6317	642.824	1226.75	828.129	899.233	-3.55217	2.77658e-16	8.52011e-14
LOC_Os08g08820	5109238	5116781	232.932	414.707	218.662	288.767	86.0474	90.2336	119.694	98.6584	1.54736	1.09526e-05	0.000496982
LOC_Os08g11669	6842135	6845290	0	0	0	0	6.32701	3.22263	17.5162	9.02196	-5.792	0.00058419	0.013546
LOC_Os08g13110	7783342	7783842	58.4511	51.8384	43.9192	51.4029	11.3886	15.0389	24.3281	16.9186	1.58864	0.00117129	0.0235134
LOC_Os08g13680	8147276	8148687	15.7033	19.8714	23.3613	19.6453	0	5.37105	1.94625	2.4391	2.97199	0.00116618	0.0234466
LOC_Os08g14760	8874179	8878927	0	1.72795	0	0.575982	77.1895	21.4842	17.5162	38.73	-6.03021	1.66158e-06	9.33922e-05
LOC_Os08g15070	9111251	9111709	8.72404	13.8236	0	7.51587	89.8436	36.5231	40.8712	55.746	-2.87756	0.000108096	0.00340295
LOC_Os08g16610	10160231	10165699	123.009	131.324	135.495	129.943	18.981	16.1131	15.57	16.8881	2.95011	2.42625e-14	5.90806e-12
LOC_Os08g17160	10508124	10509239	1018.97	607.373	303.697	643.346	160.706	40.82	86.6081	96.0447	2.74775	3.00502e-08	2.65389e-06
LOC_Os08g17784	10899779	10909658	50.5994	45.7906	47.657	48.0157	78.4549	187.987	138.184	134.875	-1.49273	0.00016538	0.00483446
LOC_Os08g17820	10925217	10936209	346.344	222.041	250.433	272.94	341.659	1003.31	979.936	774.969	-1.50623	0.00015973	0.00470222
LOC_Os08g18150	11126801	11130613	131.733	156.379	161.66	149.924	59.4739	46.191	41.8443	49.1698	1.61425	1.28772e-06	7.43207e-05
LOC_Os08g20420	12266091	12269671	205.015	43.1987	65.4116	104.542	461.872	575.776	441.798	493.149	-2.23745	2.81201e-06	0.000149811
LOC_Os08g20544	12331526	12342183	300.107	278.199	200.907	259.738	297.37	640.229	761.956	566.518	-1.12589	0.00218746	0.0385597
LOC_Os08g22380	13494686	13499083	123.881	87.2613	104.659	105.267	22.7772	33.3005	35.0325	30.3701	1.78519	3.61787e-06	0.000188545
LOC_Os08g23580	14267649	14275938	6.10683	5.18384	7.47561	6.25543	11.3886	39.7458	53.5218	34.8854	-2.49028	0.000386098	0.00975467
LOC_Os08g23870	14450166	14451006	604.576	1293.37	699.904	865.95	2680.12	2032.4	1968.63	2227.05	-1.36253	3.8019e-05	0.00139357
LOC_Os08g25440	15484361	15486133	19.1929	37.1509	34.5747	30.3062	99.9668	104.198	82.7156	95.6269	-1.65761	3.53833e-05	0.00130423
LOC_Os08g25640	15600545	15605067	20.9377	19.8714	15.8857	18.8983	0	4.29684	1.94625	2.08103	3.13997	0.000790897	0.0173602
LOC_Os08g26990	16489493	16490328	8.72404	30.2391	18.689	19.2174	0	0	0	0	6.57281	5.44188e-06	0.000269717
LOC_Os08g27260	16645741	16645992	29.6617	85.5334	54.1982	56.4644	6.32701	10.7421	1.94625	6.33845	3.1696	2.0917e-06	0.000114604
LOC_Os08g29600	18161058	18161614	45.365	39.7428	40.1814	41.7631	227.772	104.198	121.641	151.204	-1.85254	3.12463e-06	0.000165129
LOC_Os08g30930	19094725	19098940	248.635	311.894	332.665	297.731	795.938	704.681	638.37	712.996	-1.25964	8.20514e-07	5.1415e-05
LOC_Os08g31280	19340472	19341395	2.61721	0	0	0.872404	11.3886	19.3358	13.6237	14.7827	-4.0662	0.000789319	0.01734
LOC_Os08g31670	19632712	19635614	36.641	18.1434	20.5579	25.1141	86.0474	157.909	119.694	121.217	-2.27164	1.23888e-07	9.26273e-06
LOC_Os08g31700	19647746	19649747	118.647	157.243	130.823	135.571	356.843	235.252	222.845	271.647	-1.0005	0.001346	0.0263179
LOC_Os08g32370	20046559	20052310	50.5994	45.7906	64.4771	53.6224	155.644	205.174	119.694	160.171	-1.57928	8.09959e-06	0.000384081
LOC_Os08g32390	20060667	20061749	30.5341	35.4229	49.5259	38.4943	148.052	135.35	64.2262	115.876	-1.58827	0.00021283	0.0059085
LOC_Os08g32600	20186975	20192388	17.4481	107.997	28.968	51.4709	6.32701	4.29684	18.4894	9.7044	2.3914	0.00176449	0.0326337
LOC_Os08g33270	20728662	20735072	42.7478	70.8458	43.9192	52.5043	15.1848	16.1131	25.3012	18.8664	1.46798	0.00266913	0.0445724
LOC_Os08g33400	20828249	20831337	714.499	281.655	278.466	424.874	167.033	155.76	225.765	182.853	1.21564	0.00249794	0.0424956
LOC_Os08g34500	21643599	21649534	136.967	180.57	120.544	146.027	406.194	325.485	326.97	352.883	-1.27142	1.04702e-05	0.000479225
LOC_Os08g35110	22136791	22137879	62.8131	12.0956	21.4924	32.1337	11.3886	2.14842	3.8925	5.80985	2.4995	0.00247006	0.0422123
LOC_Os08g35670	22492748	22497789	245.146	513.2	204.645	320.997	106.294	114.94	112.882	111.372	1.52718	6.32769e-05	0.00215436
LOC_Os08g35910	22647366	22652881	149.181	129.596	114.938	131.238	29.1043	56.9331	77.8499	54.6291	1.25534	0.00174929	0.0324438
LOC_Os08g36010	22692351	22694354	46.2374	70.8458	59.8049	58.9627	11.3886	15.0389	18.4894	14.9723	1.96624	3.73205e-05	0.00137371
LOC_Os08g36570	23077540	23079365	748.523	482.097	403.683	544.768	312.554	98.8273	90.5006	167.294	1.70728	0.000208044	0.0058001
LOC_Os08g36870	23295968	23301712	0	7.77576	2.80335	3.52637	35.4313	50.4878	25.3012	37.0734	-3.38767	1.83211e-05	0.000754578
LOC_Os08g36900	23335165	23337151	2.61721	2.59192	0.934451	2.04786	355.578	1106.44	2340.36	1267.46	-9.26093	1.25344e-34	2.17107e-31
LOC_Os08g37690	23869795	23871110	254.742	260.056	209.317	241.372	712.422	458.687	419.417	530.175	-1.13371	0.000151151	0.00451532
LOC_Os08g37730	23894541	23896644	0	0	0	0	2.5308	7.51947	13.6237	7.89134	-5.60165	0.00113548	0.0229873
LOC_Os08g37840	23969345	23970659	1080.91	769.8	449.471	766.727	158.175	88.0852	79.7962	108.686	2.82314	4.0249e-13	7.76776e-11
LOC_Os08g38190	24197695	24201723	100.326	62.2061	114.938	92.49	15.1848	38.6715	44.7637	32.8734	1.48002	0.0015917	0.0301561
LOC_Os08g38300	24261320	24262356	370.772	388.788	199.038	319.533	125.275	70.8978	84.6618	93.6115	1.77536	1.27584e-06	7.41227e-05
LOC_Os08g38320	24274009	24277516	80.2612	76.8936	76.625	77.9266	24.0426	20.41	21.4087	21.9538	1.83097	4.73218e-06	0.000239771
LOC_Os08g40540	25667017	25668442	67.1751	23.3273	39.247	43.2498	106.294	100.976	183.92	130.397	-1.59401	0.000428344	0.010615
LOC_Os08g40590	25694808	25699639	57.5787	84.6694	56.0671	66.1051	174.626	208.397	177.109	186.71	-1.49713	3.33156e-06	0.000174662
LOC_Os08g40910	25888230	25889165	189.312	305.847	117.741	204.3	1243.89	1134.37	718.166	1032.14	-2.33585	3.77647e-10	4.80141e-08
LOC_Os08g40919	25889494	25893900	174.481	326.582	203.71	234.924	67.0663	62.3042	102.178	77.1828	1.60258	1.26376e-05	0.000554326
LOC_Os08g41440	26165009	26167022	40.1306	47.5185	59.8049	49.1513	18.981	10.7421	10.7044	13.4758	1.88191	0.000226925	0.00623907
LOC_Os08g41550	26245378	26250946	68.9199	102.813	100.921	90.8845	36.6967	26.8552	32.1131	31.8883	1.51403	0.000112718	0.003519
LOC_Os08g41750	26351181	26352296	3.48962	4.31987	0.934451	2.91465	26.5734	23.6326	40.8712	30.3591	-3.37046	8.21659e-06	0.000388928
LOC_Os08g41890	26448418	26452961	77.644	28.5111	46.7226	50.9592	148.052	227.732	340.594	238.793	-2.23002	3.33701e-07	2.26934e-05
LOC_Os08g42390	26751370	26754564	198.036	69.1179	88.7729	118.642	299.9	364.157	364.922	342.993	-1.53152	0.000107205	0.00337896
LOC_Os08g42590	26918194	26921575	635.11	1909.38	1389.53	1311.34	589.677	580.073	522.568	564.106	1.21714	0.000962901	0.0202409
LOC_Os08g42890	27118803	27119438	9496.99	8024.59	6738.33	8086.64	339.128	54.7847	80.7693	158.227	5.67706	1.2911e-11	1.99776e-09
LOC_Os08g43050	27205869	27209951	3.48962	11.2317	8.41006	7.71044	27.8389	34.3747	40.8712	34.3616	-2.15959	0.000437765	0.0107674
LOC_Os08g43210	27324298	27325279	9.59645	6.91179	1.8689	6.12571	134.133	102.05	61.3068	99.1631	-4.00238	1.64309e-12	3.02397e-10
LOC_Os08g43270	27357415	27359108	24.4273	42.3347	33.6402	33.4674	316.351	274.998	290.964	294.104	-3.13479	5.47487e-22	3.00183e-19
LOC_Os08g43334	27380765	27390339	529.549	469.138	312.107	436.931	1070.53	973.234	810.613	951.459	-1.12206	8.91339e-05	0.00289966
LOC_Os08g43390	27420501	27422836	0	0	0	0	6.32701	6.44526	9.73124	7.50117	-5.52185	0.000982294	0.0205266
LOC_Os08g43550	27547971	27549173	15.7033	6.04781	4.67226	8.80778	54.4123	50.4878	42.8175	49.2392	-2.47618	1.57626e-05	0.00067344
LOC_Os08g44230	27842259	27847633	172.736	216.857	188.759	192.784	56.9431	60.1557	104.124	73.741	1.38048	6.77594e-05	0.0022951
LOC_Os08g44360	27916313	27922617	0	0	0	0	0	11.8163	12.6506	8.15564	-5.64762	0.00296526	0.0481468
LOC_Os08g44420	27942706	27948818	114.285	489.873	185.956	263.371	37.9621	64.4526	96.3393	66.2513	1.98671	0.000121394	0.0037236
LOC_Os09g00999	2874	5458	2482.86	1077.38	886.794	1482.34	4693.38	4489.12	2003.66	3728.72	-1.33065	0.00180445	0.0332094
LOC_Os09g01360	286233	297374	64.5579	133.916	80.3628	92.9455	50.6161	23.6326	33.0862	35.7783	1.38509	0.00215438	0.0381811
LOC_Os09g02770	1255785	1257020	143.947	67.3899	91.5762	100.971	51.8815	26.8552	32.1131	36.9499	1.45815	0.000950397	0.0200582
LOC_Os09g03810	1932233	1932893	0	2.59192	0	0.863974	103.763	60.1557	82.7156	82.2114	-6.53408	7.35535e-12	1.20235e-09
LOC_Os09g04960	2663446	2669408	167.502	142.556	173.808	161.288	291.043	368.454	334.755	331.417	-1.04003	0.000100086	0.00318894
LOC_Os09g06499	3073884	3092870	917.769	1448.88	1633.42	1333.36	207.526	201.951	313.346	240.941	2.46671	6.74462e-15	1.82995e-12
LOC_Os09g06560	3118920	3125244	214.611	225.497	185.956	208.688	25.308	55.8589	48.6562	43.2744	2.26045	3.55412e-10	4.60775e-08
LOC_Os09g06920	3335140	3341666	0	0	0	0	98.7014	116.015	104.124	106.28	-9.34341	5.2254e-14	1.1754e-11
LOC_Os09g08300	4290113	4291626	33.1514	77.7576	27.0991	46.0027	12.654	1.07421	8.75812	7.49545	2.63484	0.0002497	0.00675396
LOC_Os09g08620	4502955	4506806	144.819	89.8533	71.9527	102.208	235.365	286.814	168.351	230.176	-1.1697	0.00136792	0.0266278
LOC_Os09g08710	4577706	4580686	83.7508	95.9011	78.4939	86.0486	8.85782	27.9294	18.4894	18.4255	2.20993	1.7548e-06	9.80527e-05
LOC_Os09g09650	5197975	5201335	95.0921	96.765	79.4284	90.4285	241.692	197.655	171.27	203.539	-1.16789	0.000110098	0.00344966
LOC_Os09g10620	5789801	5790358	25.2997	45.7906	28.0335	33.0413	103.763	66.601	78.8231	83.0624	-1.32597	0.00146984	0.0283394
LOC_Os09g10780	5883560	5884196	125.626	43.1987	48.5915	72.4721	345.455	157.909	154.727	219.363	-1.59526	0.000846226	0.018315
LOC_Os09g11440	6368332	6371361	21.8101	27.6472	11.2134	20.2236	1.2654	2.14842	4.86562	2.75981	2.83389	0.00122496	0.0244417
LOC_Os09g11790	6594470	6594871	125.626	348.181	257.909	243.905	10.1232	6.44526	5.83875	7.46907	5.05043	5.98846e-22	3.21641e-19
LOC_Os09g12290	6995049	7009516	712.754	1686.48	1725.93	1375.05	446.687	349.118	460.288	418.698	1.71549	1.2189e-06	7.12869e-05
LOC_Os09g12780	7334171	7335241	62.8131	31.967	14.9512	36.5771	6.32701	1.07421	2.91937	3.4402	3.44965	2.7962e-05	0.00107275
LOC_Os09g14700	8726763	8729680	82.006	10.3677	21.4924	37.9554	97.436	143.944	166.404	135.928	-1.84057	0.00194897	0.0352068
LOC_Os09g15230	9245915	9246868	0	0	0	0	10.1232	8.59368	4.86562	7.86084	-5.58055	0.000807482	0.0176213
LOC_Os09g15330	9366323	9370328	194.546	286.839	318.648	266.678	989.545	508.101	494.347	663.998	-1.31533	0.000185606	0.00529939
LOC_Os09g15700	9577650	9581099	209.377	256.6	119.61	195.196	89.8436	99.9015	64.2262	84.6571	1.20786	0.00126951	0.025254
LOC_Os09g17850	10922338	10926994	242.528	243.641	260.712	248.96	107.559	84.8626	134.291	108.904	1.19102	6.24655e-05	0.00213225
LOC_Os09g19890	11904341	11908232	252.997	229.817	213.989	232.268	473.26	455.465	482.67	470.465	-1.01811	2.74255e-05	0.00105524
LOC_Os09g20400	12263315	12267430	158.778	84.6694	90.6418	111.363	466.933	350.192	462.234	426.453	-1.93647	4.62857e-09	4.85318e-07
LOC_Os09g21000	12662738	12667523	225.08	516.656	458.816	400.184	197.403	196.58	181.001	191.661	1.06233	0.00212236	0.0377591
LOC_Os09g21710	13154943	13155832	23.5549	19.0074	11.2134	17.9252	102.498	87.011	71.0381	86.8489	-2.27006	2.20568e-07	1.55628e-05
LOC_Os09g23220	13780703	13782442	0	0	0	0	1.2654	11.8163	24.3281	12.4699	-6.26145	0.000166659	0.00485729
LOC_Os09g23300	13831868	13833654	27.0445	50.1105	29.9024	35.6858	125.275	94.5304	71.0381	96.9478	-1.43706	0.000595506	0.0137409
LOC_Os09g23640	14046754	14050424	115.157	86.3974	115.872	105.809	40.4929	45.1168	53.5218	46.3772	1.18541	0.000840572	0.0182376
LOC_Os09g25160	15085404	15086698	75.0268	63.934	88.7729	75.9112	107.559	150.389	279.287	179.078	-1.24196	0.00200743	0.0360625
LOC_Os09g25170	15087007	15088116	50.5994	24.1913	22.4268	32.4058	96.1706	96.6789	106.071	99.64	-1.61917	0.000120022	0.00369012
LOC_Os09g25380	15208405	15215467	109.051	116.636	57.0015	94.2295	6.32701	13.9647	9.73124	10.0077	3.2235	3.61313e-10	4.63497e-08
LOC_Os09g25740	15438141	15440358	138.712	71.7098	83.1662	97.8627	30.3697	35.4489	30.1669	31.9951	1.61284	9.96879e-05	0.0031801
LOC_Os09g26370	15927025	15928164	28.7893	18.1434	28.0335	24.9888	64.5355	71.972	97.3124	77.94	-1.64554	8.71591e-05	0.00287723
LOC_Os09g26470	15991281	15996929	143.947	330.902	293.418	256.089	115.152	60.1557	63.2531	79.5201	1.69228	3.26761e-05	0.00123028
LOC_Os09g26670	16200910	16201902	35.7686	7.77576	9.34451	17.6296	54.4123	76.2689	54.495	61.7254	-1.80574	0.0021812	0.0385009
LOC_Os09g26760	16252173	16257558	21.8101	45.7906	28.0335	31.8781	3.79621	3.22263	1.94625	2.98836	3.43926	8.99478e-06	0.000416768
LOC_Os09g27480	16696171	16697423	84.6232	122.684	117.741	108.349	0	0	0	0	9.06755	3.32927e-13	6.68853e-11
LOC_Os09g27750	16886019	16887617	0	0	0	0	111.355	213.768	318.212	214.445	-10.3579	1.90173e-16	6.03008e-14
LOC_Os09g27890	16958544	16962181	52.3443	38.0148	23.3613	37.9068	6.32701	11.8163	13.6237	10.589	1.82537	0.00203555	0.0364433
LOC_Os09g28150	17077665	17079644	42.7478	41.4707	62.6082	48.9423	177.156	113.866	107.044	132.689	-1.43747	0.000122996	0.00375958
LOC_Os09g28850	17533437	17537827	54.0891	63.0701	51.3948	56.1847	240.426	198.729	177.109	205.421	-1.86794	1.97196e-09	2.18979e-07
LOC_Os09g29430	17881819	17885641	198.036	340.406	330.796	289.746	146.787	84.8626	94.3931	108.681	1.41839	5.17953e-05	0.0018055
LOC_Os09g29490	17932644	17935814	661.282	215.129	150.447	342.286	40.4929	63.3784	31.14	45.0037	2.928	1.58578e-08	1.50666e-06
LOC_Os09g29584	17987174	17996613	23.5549	23.3273	16.8201	21.2341	2.5308	4.29684	1.94625	2.92463	2.86428	0.000452472	0.011046
LOC_Os09g30411	18511782	18514353	15.7033	20.7354	17.7546	18.0644	96.1706	47.2652	61.3068	68.2475	-1.91282	3.89895e-05	0.0014232
LOC_Os09g30446	18543826	18549134	64.5579	60.4781	53.2637	59.4333	92.3744	147.167	215.06	151.534	-1.35341	0.000432715	0.0106931
LOC_Os09g31200	18760704	18761836	109.051	106.269	101.855	105.725	335.332	175.096	207.275	239.234	-1.17567	0.000426195	0.0105841
LOC_Os09g31350	18845066	18848443	50.5994	93.3091	30.8369	58.2485	12.654	13.9647	19.4625	15.3604	1.91684	0.000494721	0.0118737
LOC_Os09g32095	19158244	19159491	62.8131	57.0223	22.4268	47.4207	101.232	184.764	116.775	134.257	-1.49993	0.000738796	0.0165619
LOC_Os09g32330	19302892	19305020	408.285	389.652	287.811	361.916	1137.6	698.236	573.17	803.001	-1.14864	0.000382705	0.00970331
LOC_Os09g32540	19424957	19430845	562.701	576.27	449.471	529.481	1481.79	2050.67	1835.31	1789.25	-1.75672	3.95874e-12	6.80955e-10
LOC_Os09g32730	19519240	19520185	38.3858	30.2391	25.2302	31.285	188.545	98.8273	122.614	136.662	-2.12281	8.88763e-08	6.79955e-06
LOC_Os09g34250	20222174	20224114	44.4926	137.372	93.4451	91.7698	2.5308	11.8163	4.86562	6.40424	3.82408	1.02073e-09	1.19025e-07
LOC_Os09g35600	20469822	20471447	89.8576	38.8788	37.3781	55.3715	7.59241	4.29684	0	3.96308	3.86924	3.26288e-07	2.22467e-05
LOC_Os09g35790	20591230	20595143	560.956	495.057	318.648	458.22	1565.3	943.156	800.881	1103.11	-1.26665	0.000187993	0.00534297
LOC_Os09g36060	20764202	20768571	328.896	614.285	422.372	455.185	7.59241	1.07421	4.86562	4.51075	6.69306	1.3199e-34	2.17107e-31
LOC_Os09g36740	21197503	21199723	33.1514	58.7502	23.3613	38.4209	5.06161	4.29684	12.6506	7.33635	2.36772	0.000378567	0.00965418
LOC_Os09g36820	21239750	21242582	48.8546	82.9415	67.2805	66.3589	12.654	11.8163	16.5431	13.6711	2.27289	2.09278e-06	0.000114604
LOC_Os09g36900	21276447	21280620	113.413	112.317	110.265	111.998	56.9431	48.3394	58.3875	54.5567	1.03779	0.00152904	0.029107
LOC_Os09g37710	21735440	21740633	153.543	182.298	197.169	177.67	220.18	464.059	401.9	362.046	-1.02861	0.00216315	0.0382593
LOC_Os09g38000	21902714	21905059	54.9615	40.6068	31.7713	42.4465	0	2.14842	0.973124	1.04051	5.29209	1.12295e-07	8.44524e-06
LOC_Os09g38450	22134460	22137041	10.4689	68.2539	18.689	32.4706	3.79621	1.07421	8.75812	4.54285	2.81884	0.00152071	0.0290015
LOC_Os09g38600	22202078	22204168	7.85164	25.0552	33.6402	22.1824	0	5.37105	0.973124	2.11472	3.3624	0.000949819	0.0200582
LOC_Os09g39440	22677560	22680376	158.778	230.681	225.203	204.887	446.687	583.296	467.1	499.027	-1.28473	4.73747e-06	0.000239771
LOC_Os09g39730	22791286	22792870	18.3205	12.9596	10.279	13.853	29.1043	76.2689	90.5006	65.2912	-2.24	4.02003e-05	0.0014593
LOC_Os09g39780	22809904	22811004	694.434	457.906	507.407	553.249	289.777	257.81	232.577	260.055	1.09023	8.8254e-05	0.00288314
LOC_Os10g01570	377147	382430	138.712	233.273	95.314	155.766	30.3697	27.9294	45.7368	34.6786	2.16271	5.68138e-07	3.69263e-05
LOC_Os10g01650	431802	433551	56.7063	98.493	78.4939	77.8977	40.4929	24.7068	25.3012	30.167	1.37758	0.00133723	0.0262245
LOC_Os10g01760	488939	489472	29.6617	50.9744	21.4924	34.0429	0	0	0	0	7.39866	3.62109e-08	3.13487e-06
LOC_Os10g02380	866389	870954	9.59645	4.31987	4.67226	6.19619	26.5734	48.3394	52.5487	42.4872	-2.77964	6.55516e-06	0.000320667
LOC_Os10g02625	1004276	1005490	103.816	142.556	132.692	126.355	15.1848	1.07421	10.7044	8.9878	3.83456	1.03375e-12	1.95728e-10
LOC_Os10g02770	1092789	1096966	46.2374	45.7906	11.2134	34.4138	5.06161	3.22263	4.86562	4.38329	2.97818	0.000103994	0.00328561
LOC_Os10g05460	2691360	2692392	67.1751	32.831	39.247	46.4177	3.79621	21.4842	12.6506	12.6437	1.8608	0.00252027	0.0427374
LOC_Os10g05750	2897616	2899194	6577.93	7144.2	4604.98	6109.03	3835.43	1113.96	1940.41	2296.6	1.41171	0.000446553	0.0109528
LOC_Os10g07114	3740880	3743910	44.4926	38.8788	57.0015	46.791	102.498	128.905	147.915	126.439	-1.43815	4.52234e-05	0.00161054
LOC_Os10g07450	3949346	3950209	193.674	72.5738	62.6082	109.619	297.37	272.849	231.604	267.274	-1.28456	0.00255479	0.043086
LOC_Os10g09850	5325563	5329971	125.626	101.949	85.9695	104.515	259.407	365.231	321.131	315.257	-1.59295	1.01546e-07	7.70166e-06
LOC_Os10g09870	5340966	5346935	140.457	106.269	92.5107	113.079	49.3507	41.8942	63.2531	51.4993	1.13236	0.00191834	0.0348667
LOC_Os10g11330	6284702	6286882	12.2137	81.2135	41.1159	44.8477	1.2654	11.8163	6.81187	6.63119	2.73751	0.000555542	0.0130776
LOC_Os10g14020	7623932	7625107	0	0	0	0	3.79621	12.8905	39.8981	18.8616	-6.85766	8.6236e-06	0.000400982
LOC_Os10g14230	7712328	7714713	2.61721	0	0	0.872404	111.355	58.0073	36.0056	68.4561	-6.26656	5.86397e-10	7.27962e-08
LOC_Os10g16440	8193773	8201072	710.137	854.47	879.319	814.642	0	0	0	0	11.9781	4.34606e-23	2.48652e-20
LOC_Os10g17790	9000703	9002773	0.872404	0	0	0.290801	5.06161	15.0389	18.4894	12.8633	-5.34316	0.000413173	0.0103168
LOC_Os10g18510	9393164	9395500	38.3858	37.1509	29.9024	35.1464	153.114	80.5657	54.495	96.0581	-1.44415	0.00152007	0.0290015
LOC_Os10g19898	9957415	9959380	200.653	565.903	565.343	443.966	36.6967	12.8905	36.9787	28.8553	3.94539	1.23065e-16	3.94977e-14
LOC_Os10g19902	9960579	9961128	988.434	867.429	711.117	855.66	65.8009	23.6326	48.6562	46.0299	4.22392	5.97038e-32	7.4823e-29
LOC_Os10g19904	9963958	9964501	6.10683	123.548	23.3613	51.0054	5.06161	0	0.973124	2.01158	4.73837	1.70738e-05	0.000710992
LOC_Os10g19919	9984427	9987828	69.7923	3.45589	13.0823	28.7769	268.265	808.88	374.653	483.933	-4.07143	0.000363642	0.00933691
LOC_Os10g19925	9992320	9992760	2569.23	3882.7	3948.99	3466.97	1585.55	982.902	1598.84	1389.1	1.31957	9.62475e-06	0.000442839
LOC_Os10g19960	10011969	10017330	1831.18	2334.46	1593.24	1919.62	847.82	743.353	1044.16	878.445	1.12759	2.36495e-05	0.00092758
LOC_Os10g20470	10301575	10304395	194.546	235.865	200.907	210.439	74.6587	95.6046	112.882	94.3819	1.1527	0.000158185	0.0046724
LOC_Os10g20650	10427659	10431911	0	0	0	0	2.5308	20.41	31.14	18.0269	-6.79161	1.13869e-05	0.000509925
LOC_Os10g21540	11026550	11029493	41.003	52.7024	74.7561	56.1538	229.038	94.5304	121.641	148.403	-1.40027	0.000982729	0.0205266
LOC_Os10g22990	11989589	11990593	56.7063	25.0552	21.4924	34.418	422.644	137.499	92.4468	217.53	-2.6563	2.10204e-06	0.000114775
LOC_Os10g25310	13088805	13091555	7.85164	12.9596	11.2134	10.6749	110.09	118.163	165.431	131.228	-3.62222	8.46721e-17	2.82076e-14
LOC_Os10g26060	13497239	13499435	357147	243938	277696	292927	1.11252e+06	1.01436e+06	916623	1.0145e+06	-1.79215	3.66934e-13	7.23835e-11
LOC_Os10g26280	13600497	13606431	115.157	134.78	96.2485	115.395	41.7583	13.9647	21.4087	25.7106	2.18227	9.63987e-07	5.80554e-05
LOC_Os10g26560	13843156	13848669	41.003	77.7576	54.1982	57.6529	1.2654	7.51947	8.75812	5.84766	3.25957	1.67468e-07	1.21752e-05
LOC_Os10g26940	14171326	14172896	30.5341	76.0297	27.0991	44.5543	3.79621	6.44526	10.7044	6.98194	2.65095	7.15537e-05	0.00240812
LOC_Os10g27380	14443785	14445504	211.122	82.9415	85.0351	126.366	41.7583	23.6326	33.0862	32.8257	1.94937	3.7677e-05	0.00138489
LOC_Os10g28000	14505709	14508788	131.733	181.434	185.021	166.063	78.4549	58.0073	75.9037	70.7887	1.23094	0.000164864	0.00482635
LOC_Os10g28020	14532843	14543224	383.858	539.12	527.965	483.647	193.607	233.103	273.448	233.386	1.04941	0.000199551	0.00558699
LOC_Os10g28230	14678069	14679443	634.238	462.226	338.271	478.245	204.995	91.3078	108.017	134.773	1.83141	1.28251e-06	7.41825e-05
LOC_Os10g28350	14751950	14754326	133.478	254.872	249.498	212.616	20.2464	1.07421	33.0862	18.1356	3.54555	5.92181e-09	6.11177e-07
LOC_Os10g28630	14921923	14925034	56.7063	114.908	132.692	101.436	22.7772	9.66789	15.57	16.005	2.67513	7.57859e-08	6.00763e-06
LOC_Os10g28660	14944271	14949000	1.74481	30.2391	2.80335	11.5957	58.2085	68.7494	46.71	57.8893	-2.31395	0.00302215	0.0488857
LOC_Os10g29320	15248755	15250899	0	0	0	0	22.7772	15.0389	14.5969	17.471	-6.73403	2.38083e-06	0.000128136
LOC_Os10g29650	15414197	15423563	857.573	1251.9	1433.45	1180.97	3.79621	4.29684	4.86562	4.31956	8.08258	1.36097e-55	5.96967e-52
LOC_Os10g30010	15576230	15578895	6.97923	34.5589	24.2957	21.9446	142.99	206.248	115.802	155.013	-2.82043	1.37901e-08	1.32456e-06
LOC_Os10g30020	15580171	15583761	0	1.72795	0.934451	0.887466	24.0426	33.3005	16.5431	24.6288	-4.7908	8.44906e-06	0.000396368
LOC_Os10g30280	15730619	15734015	264.338	171.067	169.136	201.514	17.7156	41.8942	32.1131	30.5743	2.71077	1.05819e-11	1.67768e-09
LOC_Os10g30410	15806654	15811018	13.9585	15.5515	25.2302	18.2467	0	4.29684	0.973124	1.75665	3.34194	0.000945016	0.0199767
LOC_Os10g32030	16826589	16831409	6.10683	2.59192	4.67226	4.457	8.85782	75.1947	115.802	66.6181	-3.9078	8.91267e-07	5.48046e-05
LOC_Os10g32110	16861659	16863255	28.7893	52.7024	18.689	33.3936	0	0	0	0	7.37103	5.41977e-08	4.44354e-06
LOC_Os10g33350	17544741	17547685	39.2582	27.6472	17.7546	28.22	105.028	90.2336	88.5543	94.6054	-1.74103	2.23125e-05	0.00088437
LOC_Os10g33460	17619114	17623642	0	3.45589	2.80335	2.08642	15.1848	16.1131	15.57	15.6227	-2.90906	0.00243628	0.0418799
LOC_Os10g33862	17973596	17974879	66.3027	73.4378	103.724	81.1549	199.934	198.729	164.458	187.707	-1.21023	0.000147519	0.00441683
LOC_Os10g34790	18573539	18575856	125.626	49.2465	66.346	80.4062	10.1232	18.2616	11.6775	13.3541	2.58558	9.17294e-07	5.58828e-05
LOC_Os10g34990	18666506	18666979	2.61721	4.31987	7.47561	4.80423	27.8389	26.8552	25.3012	26.6651	-2.48026	0.000285751	0.00758106
LOC_Os10g35330	18885473	18888739	50.5994	33.695	40.1814	41.4919	196.137	105.273	134.291	145.234	-1.8049	2.00536e-06	0.000110644
LOC_Os10g35580	19033885	19036321	55.8339	150.331	34.5747	80.2467	29.1043	7.51947	19.4625	18.6954	2.1112	0.000736771	0.0165435
LOC_Os10g35800	19146523	19148586	3216.55	4238.65	4688.14	4047.78	19011.4	8075.91	6554.97	11214.1	-1.47005	0.000139747	0.00420808
LOC_Os10g35840	19159093	19162504	86.368	72.5738	67.2805	75.4074	35.4313	20.41	35.0325	30.2912	1.31795	0.00134934	0.0263638
LOC_Os10g36420	19471068	19475406	0	0	0	0	3.79621	3.22263	14.5969	7.20523	-5.46989	0.00201495	0.0361729
LOC_Os10g36580	19568640	19569328	443.181	351.637	287.811	360.877	231.569	102.05	147.915	160.511	1.17199	0.000955803	0.0201239
LOC_Os10g36610	19583304	19583573	104.689	48.3825	48.5915	67.2208	24.0426	7.51947	8.75812	13.4401	2.34703	5.04949e-05	0.00177629
LOC_Os10g36670	19615205	19616026	3.48962	5.18384	1.8689	3.51412	21.5118	20.41	15.57	19.1639	-2.43581	0.00185967	0.0339562
LOC_Os10g36780	19687251	19692904	58.4511	75.1657	87.8384	73.8184	16.4502	31.1521	39.8981	29.1668	1.32664	0.0029655	0.0481468
LOC_Os10g36830	19715738	19720115	146.564	151.195	164.463	154.074	34.1659	29.0037	40.8712	34.6802	2.14816	2.93911e-10	3.86757e-08
LOC_Os10g37090	19853823	19855861	24.4273	19.0074	17.7546	20.3964	0	0	0	0	6.65883	1.6468e-06	9.30055e-05
LOC_Os10g37190	19899083	19900928	9.59645	9.50371	13.0823	10.7275	116.417	36.5231	41.8443	64.9282	-2.5933	8.51237e-06	0.000397214
LOC_Os10g37400	20022551	20023144	13.0861	15.5515	9.34451	12.6607	63.2701	36.5231	35.0325	44.9419	-1.81865	0.0005774	0.0134122
LOC_Os10g37540	20098367	20100038	251.252	254.008	183.152	229.471	12.654	12.8905	6.81187	10.7855	4.42963	1.02041e-25	7.67289e-23
LOC_Os10g37690	20166148	20171124	371.644	308.439	282.204	320.762	118.948	141.796	182.947	147.897	1.11403	0.000158099	0.0046724
LOC_Os10g38590	20592501	20593608	42.7478	58.7502	43.9192	48.4724	6.32701	1.07421	1.94625	3.11582	4.02693	2.23806e-08	2.03108e-06
LOC_Os10g39610	21168487	21169232	247.763	456.178	347.616	350.519	740.26	675.678	817.424	744.454	-1.08674	0.000213731	0.00592346
LOC_Os10g39850	21322788	21327370	65.4303	60.4781	65.4116	63.7734	20.2464	16.1131	19.4625	18.6074	1.7788	3.50314e-05	0.00129711
LOC_Os10g40360	21617952	21620589	128.243	111.453	53.2637	97.6532	604.862	485.543	489.482	526.629	-2.42908	3.16504e-12	5.4801e-10
LOC_Os10g40440	21662437	21663224	9.59645	5.18384	6.54116	7.10715	0	0	0	0	5.13758	0.00240435	0.0414665
LOC_Os10g40600	21757768	21762202	15.7033	18.1434	17.7546	17.2004	35.4313	76.2689	49.6293	53.7765	-1.64797	0.000737349	0.0165435
LOC_Os10g41250	22166887	22168850	112.54	105.405	87.8384	101.928	341.659	193.358	183.92	239.646	-1.23034	0.000341152	0.00885449
LOC_Os10g41390	22247749	22253378	298.362	374.101	389.666	354.043	107.559	139.647	193.652	146.953	1.26472	5.06201e-05	0.00177629
LOC_Os10g42066	22629803	22631277	72.4096	77.7576	111.2	87.1223	6.32701	0	0	2.109	5.53362	4.81998e-12	8.13155e-10
LOC_Os10g42299	22774954	22780305	412.647	525.296	424.241	454.061	327.739	168.651	140.13	212.173	1.10112	0.00187739	0.0342169
LOC_Os10g42490	22910460	22916203	97.7093	256.6	119.61	157.973	0	12.8905	22.3819	11.7575	3.73809	0.00246073	0.0421077
LOC_Os11g01610	356595	357786	54.0891	27.6472	11.2134	30.9832	1.2654	4.29684	7.78499	4.44908	2.76445	0.000747799	0.0167068
LOC_Os11g01620	359125	362651	23.5549	55.2943	28.0335	35.6276	10.1232	6.44526	7.78499	8.11782	2.14353	0.000654801	0.0148946
LOC_Os11g02080	563160	564398	425.733	379.284	399.945	401.654	2166.37	996.866	634.477	1265.9	-1.65553	3.45291e-05	0.00128534
LOC_Os11g02240	630580	633695	44.4926	112.317	127.085	94.6315	2.5308	8.59368	3.8925	5.00566	4.22477	2.56005e-11	3.87214e-09
LOC_Os11g02369	693419	693864	74.1544	76.8936	65.4116	72.1532	191.076	164.354	130.399	161.943	-1.16348	0.000243033	0.00661205
LOC_Os11g03290	1222800	1226701	1.74481	17.2795	14.0168	11.0137	1.2654	0	0	0.421801	4.80701	0.00287909	0.0469758
LOC_Os11g03430	1306316	1308723	34.0238	38.8788	42.0503	38.3176	8.85782	1.07421	4.86562	4.93255	2.99059	1.11563e-05	0.000502759
LOC_Os11g03750	1471819	1472376	11.3413	13.8236	5.60671	10.2572	1.2654	0	0	0.421801	4.70687	0.00220165	0.0387839
LOC_Os11g04000	1615763	1616952	799.122	5309.12	4168.59	3425.61	754.18	348.044	519.648	540.624	2.66402	2.66629e-07	1.85639e-05
LOC_Os11g04030	1626474	1631421	212.867	379.284	285.942	292.698	49.3507	96.6789	118.721	88.2502	1.72399	6.79682e-06	0.000330111
LOC_Os11g05050	2204509	2207566	509.484	627.245	613.934	583.554	1665.27	1412.59	1348.75	1475.54	-1.33808	2.02161e-08	1.85744e-06
LOC_Os11g05170	2276387	2277132	466.736	376.692	201.841	348.423	1679.19	1299.79	935.172	1304.72	-1.90408	8.77406e-08	6.75083e-06
LOC_Os11g05400	2423603	2426866	110.795	98.493	62.6082	90.6322	571.962	485.543	407.739	488.415	-2.42787	9.00289e-15	2.35108e-12
LOC_Os11g05556	2517481	2521945	351.579	558.127	467.226	458.977	188.545	229.881	264.69	227.705	1.00963	0.000575845	0.0133997
LOC_Os11g05730	2625662	2626283	68.0475	95.9011	60.7393	74.896	39.2275	7.51947	13.6237	20.1236	1.91711	0.000630054	0.0143814
LOC_Os11g05820	2696427	2699725	17.4481	28.5111	19.6235	21.8609	103.763	92.382	72.0112	89.3854	-2.02777	9.22878e-07	5.60931e-05
LOC_Os11g05940	2798972	2802221	9.59645	36.2869	7.47561	17.7863	0	0	0	0	6.46266	1.84452e-05	0.000757319
LOC_Os11g06150	2932659	2933856	22.6825	14.6876	31.7713	23.0471	0	0	0	0	6.8333	8.26719e-07	5.16807e-05
LOC_Os11g06720	3278435	3279425	22.6825	31.103	11.2134	21.6663	0	0	3.8925	1.2975	3.95593	0.000280878	0.00748273
LOC_Os11g07600	3853546	3857282	43.6202	37.1509	36.4436	39.0716	84.782	112.792	75.9037	91.1592	-1.2216	0.000993282	0.0207305
LOC_Os11g07911	4084031	4084731	34.8962	46.6546	13.0823	31.5444	70.8625	111.718	137.211	106.597	-1.75589	0.000295123	0.00776704
LOC_Os11g08170	4285112	4285498	175.353	239.321	165.398	193.357	1.2654	0	0	0.421801	8.94178	3.5374e-13	7.05282e-11
LOC_Os11g08210	4299149	4301783	308.831	298.935	243.892	283.886	111.355	105.273	116.775	111.134	1.35295	1.00164e-06	5.96404e-05
LOC_Os11g08220	4315043	4315616	5951.54	5334.17	4482.56	5256.09	1137.6	776.654	1014.97	976.406	2.42874	3.3305e-21	1.68562e-18
LOC_Os11g08240	4326038	4326364	21.8101	21.5993	6.54116	16.6502	0	1.07421	0	0.35807	5.40591	0.000206994	0.00577696
LOC_Os11g08250	4327769	4328098	32.279	32.831	19.6235	28.2445	1.2654	3.22263	8.75812	4.41538	2.63125	0.000490955	0.0118216
LOC_Os11g08260	4330064	4330414	47.1098	57.8862	12.1479	39.048	0	0	0	0	7.59687	3.33564e-08	2.91652e-06
LOC_Os11g08280	4342477	4342815	207.632	260.92	143.905	204.153	6.32701	3.22263	5.83875	5.12946	5.32304	8.03124e-24	5.28415e-21
LOC_Os11g09180	4923839	4925639	202.398	237.593	290.614	243.535	942.725	682.123	605.283	743.377	-1.60959	2.63146e-08	2.34762e-06
LOC_Os11g10090	5441804	5448578	274.807	370.645	344.813	330.088	91.109	200.877	179.055	157.014	1.06867	0.00195411	0.0352248
LOC_Os11g10590	5808751	5809017	0.872404	0	0	0.290801	24.0426	512.398	514.783	350.408	-10.1025	5.76042e-08	4.67909e-06
LOC_Os11g10820	5962686	5969581	7.85164	18.1434	4.67226	10.2224	0	0	0	0	5.66389	0.000434547	0.0107211
LOC_Os11g11420	6348492	6349758	6.97923	32.831	27.0991	22.3031	1.2654	1.07421	1.94625	1.42862	3.94688	0.000173633	0.00504379
LOC_Os11g11430	6356615	6358507	794.76	1160.32	913.893	956.323	366.967	334.079	371.733	357.593	1.41925	3.4668e-08	3.02117e-06
LOC_Os11g11530	6410837	6412449	1218.75	2273.98	1586.7	1693.14	40.4929	7.51947	13.6237	20.5454	6.39305	4.76018e-43	1.25279e-39
LOC_Os11g11540	6417573	6417989	82.006	64.798	57.936	68.2467	1.2654	0	0.973124	0.746176	6.54946	4.18587e-09	4.44208e-07
LOC_Os11g11620	6462223	6465280	38.3858	57.8862	38.3125	44.8615	0	0	1.94625	0.64875	5.96524	2.7033e-07	1.87719e-05
LOC_Os11g11680	6494799	6495209	215.484	176.251	138.299	176.678	12.654	5.37105	10.7044	9.57648	4.21693	1.5171e-20	7.25944e-18
LOC_Os11g11694	6497626	6502790	167.502	69.1179	115.872	117.497	10.1232	11.8163	42.8175	21.5857	2.42669	1.52475e-05	0.000653555
LOC_Os11g12710	7178371	7181200	10.4689	19.0074	14.0168	14.4977	70.8625	91.3078	94.3931	85.5211	-2.56161	5.15282e-09	5.33905e-07
LOC_Os11g13930	7694141	7696419	59.3235	62.2061	47.657	56.3955	16.4502	4.29684	18.4894	13.0788	2.10934	0.00011654	0.0036041
LOC_Os11g14080	7832539	7835759	20.9377	50.1105	23.3613	31.4698	0	0	0	0	7.28498	8.20634e-08	6.38978e-06
LOC_Os11g14390	8082868	8084825	24.4273	21.5993	22.4268	22.8178	7.59241	3.22263	0.973124	3.92939	2.5931	0.00114202	0.0230992
LOC_Os11g14810	8334116	8337340	247.763	123.548	221.465	197.592	20.2464	17.1874	38.925	25.4529	2.94519	1.29414e-11	1.99776e-09
LOC_Os11g14880	8373820	8374488	3315.14	2905.54	3163.12	3127.93	912.355	490.914	728.87	710.713	2.13846	4.13488e-14	9.54578e-12
LOC_Os11g14900	8379342	8382036	1.74481	19.8714	2.80335	8.13985	93.6398	65.5268	51.5756	70.2474	-3.09962	9.4923e-06	0.000439048
LOC_Os11g14930	8401643	8404969	417.882	201.306	259.777	292.988	35.4313	35.4489	50.6025	40.4942	2.8501	5.87437e-14	1.31018e-11
LOC_Os11g15280	8631629	8635205	13.9585	13.8236	15.8857	14.5559	3.79621	1.07421	0	1.62347	3.26091	0.00254546	0.0430537
LOC_Os11g15624	8864461	8867281	32.279	87.2613	100.921	73.487	6.32701	11.8163	12.6506	10.2646	2.82378	9.39888e-07	5.68699e-05
LOC_Os11g17799	9961174	9962633	10.4689	10.3677	3.73781	8.19145	67.0663	47.2652	58.3875	57.573	-2.80353	1.95686e-07	1.40329e-05
LOC_Os11g17970	10096106	10102801	170.991	362.005	245.761	259.586	1408.39	892.668	719.139	1006.73	-1.95472	5.35602e-08	4.40499e-06
LOC_Os11g18140	10207195	10215689	228.57	395.7	377.518	333.929	149.317	91.3078	128.452	123.026	1.44212	1.77696e-05	0.000735317
LOC_Os11g19864	11436951	11446266	22.6825	17.2795	17.7546	19.2389	56.9431	69.8236	43.7906	56.8524	-1.56107	0.000543666	0.0128449
LOC_Os11g22650	13032265	13032966	1.74481	0	2.80335	1.51605	6.32701	27.9294	39.8981	24.7182	-4.05383	8.7677e-05	0.00288075
LOC_Os11g23080	13280136	13283302	283.531	63.0701	95.314	147.305	937.663	2015.22	1168.72	1373.87	-3.22114	3.57591e-11	5.31699e-09
LOC_Os11g25040	14267737	14268968	154.416	214.265	283.139	217.273	0	0	0	0	10.0711	3.69212e-16	1.11689e-13
LOC_Os11g26020	14880584	14881556	0	0	0.934451	0.311484	30.3697	16.1131	17.5162	21.333	-6.05906	1.25048e-05	0.000551261
LOC_Os11g26030	14883702	14890574	222.463	74.3017	66.346	121.037	453.014	472.652	466.127	463.931	-1.93778	6.60602e-06	0.000322555
LOC_Os11g26780	15336034	15337163	13.0861	11.2317	2.80335	9.04036	2.5308	69.8236	97.3124	56.5556	-2.64543	0.0024891	0.0424275
LOC_Os11g26790	15342564	15343857	897.704	1260.54	724.2	960.814	3810.13	3437.47	2773.4	3340.33	-1.7974	3.3306e-10	4.33935e-08
LOC_Os11g26990	15531380	15533837	14.8309	25.9192	26.1646	22.3049	84.782	58.0073	61.3068	68.032	-1.60705	0.000275703	0.00740403
LOC_Os11g28480	16388381	16395195	7.85164	8.63974	11.2134	9.23493	137.929	37.5973	17.5162	64.3475	-2.79564	7.39354e-05	0.00247247
LOC_Os11g29380	17046948	17052915	476.333	870.885	736.348	694.522	182.218	251.365	244.254	225.946	1.61868	1.79722e-07	1.29587e-05
LOC_Os11g31060	18070199	18071815	773.823	994.434	541.047	769.768	2853.48	3280.64	2269.33	2801.15	-1.86326	3.62795e-10	4.63497e-08
LOC_Os11g31380	18311804	18313703	1133.25	1901.61	1614.73	1549.86	5032.51	3309.64	2820.11	3720.75	-1.26329	5.20523e-05	0.00181205
LOC_Os11g32080	18900995	18901494	177.098	141.692	135.495	151.428	8.85782	0	3.8925	4.2501	5.2184	5.55405e-19	2.43619e-16
LOC_Os11g32500	19180541	19182360	202.398	178.843	158.857	180.032	96.1706	64.4526	101.205	87.276	1.04506	0.00112923	0.0229138
LOC_Os11g32880	19421481	19429665	233.804	234.137	177.546	215.162	78.4549	92.382	135.264	102.034	1.07225	0.00106622	0.0218201
LOC_Os11g32890	19430335	19431158	88.1128	133.052	71.0183	97.3944	539.061	513.472	461.261	504.598	-2.37156	1.68913e-14	4.23377e-12
LOC_Os11g35090	20571984	20577400	120.392	158.107	99.9863	126.162	25.308	26.8552	33.0862	28.4165	2.14589	1.9434e-08	1.80729e-06
LOC_Os11g35310	20702710	20703160	49.727	107.997	42.9848	66.9028	24.0426	19.3358	9.73124	17.7032	1.9322	0.00038809	0.00976096
LOC_Os11g36760	21705480	21708029	711.882	470.866	617.672	600.14	189.81	182.616	231.604	201.343	1.57451	1.7361e-08	1.64355e-06
LOC_Os11g37270	22011917	22013643	14754.1	15724.3	17753.6	16077.4	58536.2	71109.4	61737	63794.2	-1.9884	4.89065e-19	2.18156e-16
LOC_Os11g38220	22651496	22652160	2.61721	26.7832	14.9512	14.7839	0	0	0	0	6.19435	8.75467e-05	0.00288007
LOC_Os11g38870	23132264	23137598	6.10683	16.4155	11.2134	11.2452	65.8009	33.3005	23.355	40.8188	-1.85166	0.00261254	0.0438781
LOC_Os11g38980	23194769	23197394	507.739	826.823	603.656	646.072	331.535	323.337	287.072	313.981	1.04162	0.000194707	0.00547468
LOC_Os11g40080	23902612	23909194	1310.35	1329.66	1320.38	1320.13	1839.9	4164.71	3527.58	3177.39	-1.26736	6.66528e-05	0.00226053
LOC_Os11g40640	24252953	24255574	27.0445	19.0074	25.2302	23.7607	1.2654	0	1.94625	1.07055	4.45141	2.82149e-05	0.0010793
LOC_Os11g40650	24259690	24261130	184.95	34.5589	57.936	92.4815	3.79621	2.14842	4.86562	3.60342	4.67528	6.11872e-10	7.52488e-08
LOC_Os11g42170	25399967	25400677	8.72404	10.3677	5.60671	8.23281	107.559	60.1557	49.6293	72.4481	-3.12742	5.97404e-09	6.1416e-07
LOC_Os11g42520	25608408	25608796	57.5787	365.461	122.413	181.818	3.79621	1.07421	0.973124	1.94785	6.61498	2.73434e-14	6.48311e-12
LOC_Os11g42550	25617707	25618704	95.9645	73.4378	63.5427	77.6483	34.1659	22.5584	12.6506	23.125	1.76444	0.000151466	0.00451959
LOC_Os11g43360	26168969	26170260	2.61721	0	0.934451	1.18389	17.7156	11.8163	11.6775	13.7365	-3.53064	0.00152956	0.029107
LOC_Os11g43590	26299760	26305709	1.74481	3.45589	2.80335	2.66802	2.5308	40.82	54.495	32.6152	-3.61884	0.000152567	0.00453701
LOC_Os11g43760	26433999	26439652	171.864	27.6472	69.1494	89.5534	445.422	1049.5	948.796	814.574	-3.18532	1.09416e-09	1.26855e-07
LOC_Os11g44250	26741918	26743907	0.872404	0.863974	0.934451	0.890276	24.0426	16.1131	10.7044	16.9534	-4.24501	0.000165582	0.00483446
LOC_Os11g45360	27437610	27438082	578.404	1189.69	1303.56	1023.89	145.521	69.8236	98.2856	104.543	3.29518	5.60147e-18	2.23363e-15
LOC_Os11g47820	28838673	28842809	748.523	632.429	397.142	592.698	241.692	297.556	283.179	274.142	1.11197	0.000279644	0.00747933
LOC_Os12g01160	93091	95423	105.561	204.762	240.154	183.492	87.3128	73.0462	68.1187	76.1592	1.2704	0.000780341	0.0172002
LOC_Os12g02040	606570	608215	357.686	425.075	414.896	399.219	2710.49	1256.83	844.672	1604	-2.00595	2.93826e-07	2.02432e-05
LOC_Os12g02200	679074	682269	52.3443	127.868	117.741	99.3177	21.5118	26.8552	29.1937	25.8536	1.93642	2.27237e-05	0.000897963
LOC_Os12g02310	732978	734220	591.49	402.612	359.764	451.288	1122.41	1045.21	789.204	985.607	-1.12639	0.000116886	0.00361056
LOC_Os12g02330	746155	747300	27.0445	4.31987	2.80335	11.3893	108.825	153.612	97.3124	119.916	-3.3909	8.11702e-08	6.33899e-06
LOC_Os12g02980	1107401	1110538	58.4511	183.162	250.433	164.015	7.59241	1.07421	1.94625	3.53762	5.60383	5.80753e-15	1.59211e-12
LOC_Os12g03180	1212877	1216296	16.5757	56.1583	24.2957	32.3432	1.2654	7.51947	7.78499	5.52329	2.52005	0.000980152	0.0205053
LOC_Os12g03250	1242368	1246665	457.14	254.008	311.172	340.773	666.867	815.325	760.01	747.401	-1.13323	0.000115113	0.00358102
LOC_Os12g03360	1305139	1307108	34.0238	41.4707	43.9192	39.8046	7.59241	11.8163	14.5969	11.3352	1.79614	0.000805584	0.0175945
LOC_Os12g03830	1568001	1572324	887.235	1151.68	1340	1126.31	269.531	207.322	301.669	259.507	2.11737	5.17789e-14	1.17476e-11
LOC_Os12g05540	2535821	2539020	52.3443	50.9744	22.4268	41.9152	163.237	235.252	207.275	201.921	-2.26615	4.33726e-09	4.56593e-07
LOC_Os12g06200	2939684	2945064	137.84	127.868	147.643	137.784	39.2275	62.3042	56.4412	52.6576	1.3819	4.46623e-05	0.00159271
LOC_Os12g06760	3287847	3288382	37.5134	51.8384	50.4604	46.6041	1.2654	0	0	0.421801	6.88853	8.54222e-08	6.59279e-06
LOC_Os12g06820	3317597	3319831	41.8754	31.967	32.7058	35.5161	206.261	147.167	155.7	169.709	-2.2541	5.39182e-11	7.92748e-09
LOC_Os12g06980	3402727	3413832	57.5787	164.155	69.1494	96.961	12.654	27.9294	38.925	26.5028	1.86013	0.000526269	0.0125003
LOC_Os12g07550	3761710	3762557	67.1751	47.5185	33.6402	49.4446	420.114	137.499	145.969	234.527	-2.24227	2.45872e-06	0.000132058
LOC_Os12g10800	5808123	5816196	32.279	44.0627	50.4604	42.2673	69.5971	132.128	129.426	110.383	-1.38945	0.000524609	0.0124721
LOC_Os12g12220	6710981	6711600	70.6647	185.754	156.988	137.802	1.2654	0	0.973124	0.746176	7.56256	1.29803e-11	1.99776e-09
LOC_Os12g12230	6715419	6717177	495.526	1543.92	819.514	952.987	21.5118	7.51947	3.8925	10.9746	6.4834	1.40724e-33	2.05755e-30
LOC_Os12g13030	7235000	7236919	23.5549	59.6142	86.904	56.691	0	0	0	0	8.1322	8.50423e-10	1.02198e-07
LOC_Os12g13100	7285912	7287583	79.3888	114.045	109.331	100.921	50.6161	36.5231	43.7906	43.6433	1.21226	0.000954941	0.0201218
LOC_Os12g13570	7612301	7620079	44.4926	83.8054	40.1814	56.1598	10.1232	6.44526	13.6237	10.0641	2.47499	1.0632e-05	0.000484426
LOC_Os12g13640	7664708	7669593	63.6855	118.364	72.8872	84.979	43.0237	30.0779	33.0862	35.3959	1.26881	0.00240014	0.0414481
LOC_Os12g13950	7921635	7926719	116.03	97.629	68.2149	93.9579	7.59241	20.41	23.355	17.1191	2.43692	3.65432e-07	2.44719e-05
LOC_Os12g13960	7935903	7936286	2322.34	4160.9	2690.29	3057.84	140.46	41.8942	72.0112	84.7883	5.17888	2.78431e-37	5.63672e-34
LOC_Os12g16210	9274091	9276999	29.6617	57.0223	18.689	35.1243	6.32701	6.44526	12.6506	8.47429	2.03804	0.0020561	0.0367862
LOC_Os12g16510	9453854	9457055	14.8309	31.967	16.8201	21.206	77.1895	61.2299	39.8981	59.4392	-1.48046	0.00281356	0.0462597
LOC_Os12g16880	9686915	9687610	570.552	805.223	465.357	613.711	3459.61	3962.76	877.758	2766.71	-2.17231	1.88183e-06	0.000104518
LOC_Os12g17010	9733273	9734352	0.872404	0.863974	0	0.578793	25.308	12.8905	17.5162	18.5716	-4.97162	8.74748e-05	0.00288007
LOC_Os12g17030	9740767	9741206	1021.15	837.19	894.27	917.536	2291.64	1691.88	1817.8	1933.77	-1.07558	0.00255556	0.043086
LOC_Os12g17530	10048848	10053017	27.0445	69.1179	24.2957	40.1527	3.79621	4.29684	4.86562	4.31956	3.20996	8.50594e-06	0.000397214
LOC_Os12g17804	10194067	10196413	1.74481	3.45589	4.67226	3.29099	22.7772	26.8552	14.5969	21.4098	-2.70535	0.000570134	0.0133021
LOC_Os12g17840	10211508	10212437	31.4066	11.2317	20.5579	21.0654	0	2.14842	4.86562	2.33801	3.10379	0.000969118	0.0203386
LOC_Os12g17910	10293567	10297912	990.179	2060.58	1475.5	1508.75	844.023	567.183	617.934	676.38	1.15799	0.00034682	0.00897003
LOC_Os12g18800	10885484	10888535	25.2997	22.4633	17.7546	21.8392	45.5545	82.7141	106.071	78.1131	-1.84216	6.26549e-05	0.00213595
LOC_Os12g19100	11084855	11085444	0	6.04781	4.67226	3.57336	69.5971	11.8163	9.73124	30.3816	-3.08155	0.001761	0.0325921
LOC_Os12g22650	12792447	12792868	19.1929	48.3825	14.9512	27.5089	10.1232	0	0.973124	3.69878	2.96323	0.00226616	0.0396284
LOC_Os12g23520	13300352	13315559	17.4481	4.31987	8.41006	10.0593	0	0	0	0	5.63889	0.000479291	0.0115831
LOC_Os12g23980	13625244	13627725	8015.65	18141.7	13141.2	13099.5	117.682	11.8163	43.7906	57.7631	7.82869	1.72324e-20	8.09861e-18
LOC_Os12g24550	14026695	14037355	187.567	307.575	213.055	236.065	73.3933	119.237	137.211	109.947	1.0984	0.00175583	0.0325365
LOC_Os12g25090	14411272	14412023	6.10683	0.863974	1.8689	2.94657	32.9005	17.1874	9.73124	19.9397	-2.74585	0.0025509	0.0430627
LOC_Os12g25130	14433330	14434052	2656.47	3731.5	3065	3150.99	7.59241	0	3.8925	3.8283	9.74727	4.34443e-73	1.14337e-68
LOC_Os12g25630	14827312	14830607	262.594	377.556	292.483	310.878	120.213	150.389	158.619	143.074	1.11756	0.000127113	0.00386746
LOC_Os12g26060	15134407	15140195	22.6825	53.5664	35.5091	37.2527	8.85782	4.29684	11.6775	8.27738	2.16524	0.000639114	0.0145504
LOC_Os12g27940	16469119	16469933	3373.59	5766.16	3799.48	4313.08	26.5734	2.14842	17.5162	15.4127	8.14755	6.84213e-67	4.50178e-63
LOC_Os12g28750	16988415	16990867	228.57	87.2613	84.1006	133.311	65.8009	31.1521	34.0594	43.6708	1.6176	0.00101349	0.0210586
LOC_Os12g29960	17907578	17908652	74.1544	51.8384	62.6082	62.867	182.218	121.386	111.909	138.504	-1.13648	0.00131209	0.0259052
LOC_Os12g31370	18876115	18879204	24.4273	45.7906	21.4924	30.5701	3.79621	2.14842	8.75812	4.90091	2.61743	0.000365082	0.00936474
LOC_Os12g31810	19138380	19143545	29.6617	51.8384	25.2302	35.5768	2.5308	5.37105	6.81187	4.90457	2.83171	3.50895e-05	0.00129711
LOC_Os12g32040	19332567	19333950	3112.74	3932.81	3312.63	3452.73	137.929	24.7068	85.6349	82.7569	5.38753	6.99776e-34	1.08333e-30
LOC_Os12g34510	20888185	20889121	1235.32	777.576	658.788	890.563	596.005	273.923	344.486	404.805	1.13888	0.00173008	0.0322466
LOC_Os12g34524	20889965	20899619	21.8101	7.77576	7.47561	12.3538	43.0237	50.4878	41.8443	45.1186	-1.86558	0.000911068	0.0194307
LOC_Os12g34802	21139036	21141043	180.588	216.857	227.072	208.172	37.9621	93.4562	93.4199	74.9461	1.46682	0.000110915	0.00346682
LOC_Os12g35630	21660651	21666897	50.5994	92.4452	51.3948	64.8131	16.4502	30.0779	17.5162	21.3481	1.60017	0.000958752	0.0201698
LOC_Os12g36220	22197918	22198462	0	0.863974	0	0.287991	0	13.9647	41.8443	18.603	-5.87473	0.000434662	0.0107211
LOC_Os12g36750	22511489	22514907	232.932	161.563	144.84	179.778	363.17	536.031	555.654	484.952	-1.43211	4.14707e-06	0.000214005
LOC_Os12g36890	22602880	22607315	72.4096	318.806	87.8384	159.685	45.5545	17.1874	29.1937	30.6452	2.38798	3.30781e-05	0.00124187
LOC_Os12g38140	23420042	23420870	2.61721	0	0	0.872404	7.59241	66.601	118.721	64.3049	-6.19416	0.000368801	0.00944174
LOC_Os12g38150	23427679	23428881	5.23443	1.72795	2.80335	3.25524	39.2275	214.842	185.867	146.645	-5.49448	9.02269e-15	2.35108e-12
LOC_Os12g38760	23810525	23814363	4.36202	0.863974	0	1.742	8.85782	35.4489	44.7637	29.6901	-4.08107	3.4232e-05	0.00127891
LOC_Os12g38960	23952249	23956079	27.9169	38.0148	78.4939	48.1419	13.9194	6.44526	10.7044	10.3564	2.22398	0.00023338	0.00638472
LOC_Os12g39380	24218359	24224963	31.4066	28.5111	26.1646	28.6941	3.79621	1.07421	4.86562	3.24535	3.13823	3.33607e-05	0.00125069
LOC_Os12g39400	24237164	24238781	64.5579	39.7428	46.7226	50.3411	137.929	109.569	103.151	116.883	-1.21286	0.000724758	0.0163167
LOC_Os12g39700	24514584	24525496	29.6617	36.2869	42.0503	35.9996	1.2654	7.51947	16.5431	8.44266	2.05557	0.00275608	0.0455048
LOC_Os12g39840	24627827	24630949	435.33	424.211	425.175	428.239	151.848	206.248	181.974	180.024	1.24862	1.49393e-06	8.47357e-05
LOC_Os12g40350	24984480	24986483	7.85164	18.1434	2.80335	9.59948	0	0	0	0	5.57357	0.000813376	0.0177206
LOC_Os12g40380	25001966	25003359	45.365	41.4707	28.0335	38.2898	117.682	84.8626	87.5812	96.7087	-1.33219	0.000476126	0.0115172
LOC_Os12g40730	25214547	25225410	0	0	0	0	5.06161	68.7494	64.2262	46.0124	-8.13957	1.42961e-08	1.3632e-06
LOC_Os12g40860	25298066	25302654	230.315	185.754	155.119	190.396	15.1848	23.6326	21.4087	20.0754	3.23642	1.65714e-17	5.97434e-15
LOC_Os12g41230	25561750	25569052	398.689	560.719	386.863	448.757	120.213	145.018	178.082	147.771	1.60003	8.37325e-08	6.48139e-06
LOC_Os12g42190	26155053	26158753	13.0861	24.1913	9.34451	15.5406	0	2.14842	0	0.71614	4.42107	0.000932072	0.0197984
LOC_Os12g42300	26299853	26306151	381.241	381.012	311.172	357.808	96.1706	135.35	156.673	129.398	1.46366	7.91154e-07	5.00519e-05
LOC_Os12g42700	26530280	26536043	115.157	226.361	119.61	153.709	39.2275	41.8942	39.8981	40.3399	1.93009	9.09388e-07	5.56588e-05
LOC_Os12g42980	26698649	26703351	957.9	2023.43	2146.43	1709.25	721.279	358.786	420.39	500.152	1.77383	2.30145e-06	0.000125144
LOC_Os12g43140	26793280	26793954	34.0238	42.3347	19.6235	31.994	279.654	124.608	172.243	192.168	-2.58165	1.3549e-09	1.537e-07
LOC_Os12g43340	26888763	26890254	58.4511	53.5664	85.0351	65.6842	189.81	152.538	131.372	157.907	-1.26503	0.000228401	0.00626117
LOC_Os12g43670	27132245	27134777	198.908	121.82	107.462	142.73	46.8199	47.2652	75.9037	56.6629	1.32837	0.000676593	0.0153637
LOC_Os12g43870	27239013	27239339	20.9377	35.4229	16.8201	24.3936	87.3128	84.8626	73.9574	82.0443	-1.74564	4.18759e-05	0.00150559
LOC_Os12g44020	27303880	27307146	132.605	273.88	97.1829	167.889	24.0426	23.6326	54.495	34.0567	2.29328	2.92919e-06	0.000155424
LOC_Os12g44160	27394407	27398395	145.692	159.835	141.102	148.876	39.2275	76.2689	71.0381	62.1781	1.25305	0.000386048	0.00975467
LOC_Os12g44220	27426310	27427745	0	0	0	0	6.32701	7.51947	4.86562	6.23737	-5.25067	0.00274023	0.0454013
LOC_Os12g44270	27443875	27444246	2.61721	0.863974	0	1.1604	8.85782	39.7458	23.355	23.9862	-4.35425	4.34942e-05	0.00155739
