# Supplementary material for: OsSHMT4 Is Required for Synthesis of Rice Storage Protein and Storage Organelle Formation in Endosperm Cells
Source: Plants (Basel). 2023 Dec 26;13(1):81. doi: 10.3390/plants13010081 (PMC10780996; doi:10.3390/plants13010081)
Supplement: Supplementary file 1 [file plants-13-00081-s001.zip › Table S3.xlsx]

## Sheet: Sheet1
Table S3. Primer pairs used in this study
Primer Name	Sequence (5ʹ - 3ʹ)
RT-GluA1-F	CTTCCGTGCTCTCCCAAATG
RT-GluA1-R	GGAGTGAATGCACCGAACTC
RT-GluA2-F	GAGCGCCGTTAAAGTAAATCTA
RT-GluA2-R	ACTTGAACCTGGGCTCGGCCTT
RT-GluC1-F	AGGGAAGGCCTCCATTCTTC
RT-GluC1-R	AGAGTCCTCCCTTGAAAGCC
RT-globulin-F	CAATGGCTAGCAAGGTCGTC
RT-globulin-R	CCTGAACCTCATCTCCGACT
RT-Pro10.2-F	GCCGCTACTACAATCACCAC
RT-Pro10.2-R	GAGAGCAATTGGTTGTGGCA
RT-Pro10.3-F	AAGTGCAGCTACCGCAATCACC
RT-Pro10.3-R	AGGGATTCATGGTGCCCATTGC
RT-Pro13a.1-F	ACAACCAAGTCATGCAGCAG
RT-Pro13a.1-R	TTGGGCTTGAGCTTGAGTCT
RT-Pro13a.3-F	GCAGTGCAGCACAGTGGAAATC
RT-Pro13a.3-R	GCATGACTTGGCAGTTTCTCAGC
RT-Pro13a.5-F	CCAGGCCATTAGCAGTGTTC
RT-Pro13a.5-R	ACGCCAGCAAACTGTTGTAG
RT-Pro13a.6-F	GCTGCAGCCGCATCTCATGG
RT-Pro13a.6-R	ACGCCAGCAAACTGTTGTAG
RT-Pro13b.5-F	TGGTATCTACCCTAGGTACT
RT-Pro13b.5-R	AACTCATTACAAGACACCGCCA
RT-Pro13b.8-F	TCTTGCAATCAGCTGCGTTT
RT-Pro13b.8-R	AGCTTGAGCCAGATTCCGAT
RT-Pro13b.10-F	CCTTGCTATTGCTGCATGCAGC
RT-Pro13b.10-R	AGGACAGGCGACTGCAGCTGAT
RT-Pro13b.15-F	ACATTGTTCAGGCCATAGCG
RT-Pro13b.15-R	ACTGGGTGCACCATAGTACC
RT-Pro13b.19-F	GATGTTTTAGCTGCGTTTCAAC
RT-Pro13b.19-R	ATGTTAATACCTTGATAGTGAG
RT-Pro13b.20-F	CATTGTTCAGGCCATAGCGCAAC
RT-Pro13b.20-R	GCAAGTTCAAAGCCAACAGAGC
RT-Pro13b.21-F	GTGGCGCAACAGTCTCACTATG
RT-Pro13b.21-R	GTTCAAAGCCAACAGAGCTTGGG
RT-Pro13b.22-F	GGCGCAACAGTCTCACTATC
RT-Pro13b.22-R	AGCTTGAGCTTGACCCAGAT
RT-OsUbiquitin-F	GCTCCGTGGCGGTATCAT
RT-OsUbiquitin-R	CGGCAGTTGACAGCCCTAG
